# Supplementary material for: Differentiation of Symbiotic Cells and Endosymbionts in Medicago truncatula Nodulation Are Coupled to Two Transcriptome-Switches
Source: PubMed Central journal article supplement (PMC2832008; doi:10.1371/journal.pone.0009519), 2010-03-04
Supplement: pone.0009519.s006.pdf [file pone.0009519.s006.pdf]

| tree n° | expression profile | induction factor | clone n° | GenBank accession        | MtGI accession           | annotation                                                                                    |
|---------|--------------------|------------------|----------|--------------------------|--------------------------|-----------------------------------------------------------------------------------------------|
| 1       | profile 1          | 3,174548684      | AC0073   | <a href="#">AJ388714</a> | <a href="#">TC94210</a>  | class III peroxidase                                                                          |
| 2       | profile 1          | 3,113332709      | AC1366   | <a href="#">DY615989</a> | <a href="#">TC93959</a>  | class I chitinase                                                                             |
| 3       | profile 1          | 4,142124409      | AC0589   | <a href="#">DY615508</a> | <a href="#">TC100398</a> | chalcone reductase                                                                            |
| 4       | profile 1          | 3,293078828      | AC4521   | <a href="#">DY618225</a> | <a href="#">TC100399</a> | chalcone reductase                                                                            |
| 5       | profile 1          | 2,763481866      | AC2173   | <a href="#">DY616637</a> | <a href="#">TC94379</a>  | endoxyloglucan transferase; cell wall biosynthesis                                            |
| 6       | profile 1          | 2,381882534      | AC0320   | <a href="#">AJ388949</a> | <a href="#">TC106716</a> | 3-deoxy-D-arabino-heptulosonate 7-phosphate synthase; aromatic amino acid family biosynthesis |
| 7       | profile 1          | 2,640342419      | AC4011   | <a href="#">DY617826</a> | <a href="#">TC94783</a>  | protein of unknown function                                                                   |
| 8       | profile 1          | 2,727792485      | AC1668   | <a href="#">DY616229</a> | <a href="#">TC101355</a> | N-hydroxycinnamoyl/benzoyltransferase; phytoalexin biosynthesis                               |
| 9       | profile 1          | 4,670527656      | AC4532   | <a href="#">DY618233</a> | <a href="#">TC106619</a> | aquaporin                                                                                     |
| 10      | profile 1          | 2,736543308      | AC2320   | <a href="#">DY616740</a> | <a href="#">TC106642</a> | cysteine proteinase                                                                           |
| 11      | profile 1          | 2,165400925      | AC0416   | <a href="#">AJ389039</a> | <a href="#">TC100146</a> | polyubiquitin protein                                                                         |
| 12      | profile 1          | 5,340956395      | AC2248   | <a href="#">DY616694</a> | <a href="#">TC100291</a> | aquaporin                                                                                     |
| 13      | profile 1          | 2,790428956      | AC2703   | <a href="#">DY617025</a> | <a href="#">TC94604</a>  | arginine decarboxylase                                                                        |
| 14      | profile 1          | 2,032468495      | AC2153   | <a href="#">DY616618</a> | <a href="#">TC106701</a> | protein of unknown function                                                                   |
| 15      | profile 1          | 8,266523366      | AC1414   | <a href="#">DY616027</a> | <a href="#">TC106536</a> | chalcone synthase                                                                             |
| 16      | profile 1          | 3,823504572      | AC0662   | <a href="#">DY615578</a> | <a href="#">TC94281</a>  | isoflavone reductase                                                                          |
| 17      | profile 1          | 4,924898619      | AC2540   | <a href="#">DY616902</a> | singleton                | isoflavone reductase                                                                          |
| 18      | profile 1          | 2,637140889      | AC4715   | <a href="#">DY618371</a> | <a href="#">TC94651</a>  | MYB transcription factor                                                                      |
| 19      | profile 1          | 2,569288491      | AC2663   | <a href="#">DY616994</a> | <a href="#">TC108442</a> | protein of unknown function                                                                   |
| 20      | profile 1          | 3,444317729      | AC4171   | <a href="#">DY617954</a> | <a href="#">TC100215</a> | protein of unknown function with Sec14p-like lipid-binding domain                             |
| 21      | profile 1          | 3,377020122      | AC4841   | <a href="#">DY618465</a> | <a href="#">TC94571</a>  | protein of unknown function with DUF1645 domain                                               |
| 22      | profile 1          | 1,851731693      | AC1207   | <a href="#">DY615867</a> | <a href="#">TC95172</a>  | Ethylene-responsive transcription factor                                                      |
| 23      | profile 1          | 2,946113522      | AC4864   | <a href="#">DY618481</a> | <a href="#">TC94944</a>  | protein of unknown function                                                                   |
| 24      | profile 1          | 2,435018614      | AC3026   | <a href="#">DY617248</a> | <a href="#">TC106726</a> | protein of unknown function; B12D protein                                                     |
| 25      | profile 1          | 2,673564939      | AC4245   | <a href="#">DY618015</a> | <a href="#">TC94676</a>  | Class III peroxidase                                                                          |
| 26      | profile 1          | 4,502894407      | AC2350   | <a href="#">DY616765</a> | <a href="#">TC97485</a>  | beta-glucan-elicitor receptor                                                                 |
| 27      | profile 1          | 1,89086513       | AC1461   | <a href="#">DY616071</a> | <a href="#">TC94230</a>  | hydroxyisourate hydrolase; glycosyl hydrolase family 1 protein                                |
| 28      | profile 1          | 1,894433222      | AC3007   | <a href="#">DY617236</a> | <a href="#">TC106810</a> | cellulose synthase                                                                            |
| 29      | profile 1          | 4,551261155      | AC4215   | <a href="#">DY617986</a> | <a href="#">TC93930</a>  | 60S ribosomal protein L10                                                                     |
| 30      | profile 1          | 5,522483514      | AC1191   | <a href="#">DY615854</a> | <a href="#">TC108403</a> | protease inhibitor                                                                            |

|    |           |             |        |                          |                          |                                                                                    |
|----|-----------|-------------|--------|--------------------------|--------------------------|------------------------------------------------------------------------------------|
| 31 | profile 1 | 3,841309937 | AC0044 | <a href="#">AJ388685</a> | <a href="#">TC107101</a> | isoflavone reductase                                                               |
| 32 | profile 1 | 3,345965354 | AC1101 | <a href="#">DY615780</a> | <a href="#">TC100155</a> | lipxygenase                                                                        |
| 33 | profile 1 | 4,162226616 | AC3828 | <a href="#">DY617683</a> | <a href="#">TC94611</a>  | eukaryotic aspartyl protease                                                       |
| 34 | profile 1 | 3,073747616 | AC4284 | <a href="#">DY618045</a> | <a href="#">TC106484</a> | class III peroxidase                                                               |
| 35 | profile 1 | 4,402662817 | AC1560 | <a href="#">DY616156</a> | <a href="#">TC100746</a> | class III peroxidase                                                               |
| 36 | profile 1 | 4,400341435 | AC1700 | <a href="#">DY616252</a> | <a href="#">TC100779</a> | protein of unknown function with plastocyanin-like domain (copper binding protein) |
| 37 | profile 1 | 4,417545026 | AC2725 | <a href="#">DY617046</a> | <a href="#">TC106753</a> | protein of unknown function; DREPP plasma membrane polypeptide                     |
| 38 | profile 1 | 2,016419936 | AC1159 | <a href="#">DY615827</a> | <a href="#">TC107600</a> | lipase                                                                             |
| 39 | profile 1 | 1,877274083 | AC1741 | <a href="#">DY616282</a> | <a href="#">TC101289</a> | protein of unknown function                                                        |
| 40 | profile 1 | 2,958864522 | AC2315 | <a href="#">DY616736</a> | <a href="#">TC106503</a> | protein of unknown function; protein with 4 ACT domain repeats                     |
| 41 | profile 1 | 2,542450632 | AC3226 | <a href="#">DY617344</a> | <a href="#">TC100768</a> | protein of unknown function; IQ calmodulin-binding motif                           |
| 42 | profile 1 | 3,398984724 | AC3887 | <a href="#">DY617723</a> | singleton                | no homology                                                                        |
| 43 | profile 1 | 2,656858335 | AC1541 | <a href="#">DY616140</a> | <a href="#">TC106316</a> | plant invertase/pectin methylesterase inhibitor (PMEI)                             |
| 44 | profile 1 | 2,108181563 | AC1562 | <a href="#">DY616158</a> | <a href="#">TC94661</a>  | signal peptidase I                                                                 |
| 45 | profile 1 | 1,82994603  | AC3744 | <a href="#">DY617614</a> | <a href="#">TC107320</a> | isoflavone reductase                                                               |
| 46 | profile 1 | 2,181402092 | AC0768 | <a href="#">DY615680</a> | <a href="#">TC93944</a>  | protein of unknown function; late-embryogenesis protein                            |
| 47 | profile 1 | 3,709907936 | AC2927 | <a href="#">DY617198</a> | <a href="#">TC100398</a> | chalcone reductase                                                                 |
| 48 | profile 1 | 3,429524479 | AC0371 | <a href="#">AJ388996</a> | <a href="#">TC106667</a> | phenylalanine ammonia-lyase (PAL)                                                  |
| 49 | profile 1 | 5,899128294 | AC4292 | <a href="#">DY618051</a> | <a href="#">TC94347</a>  | class III peroxidase                                                               |
| 50 | profile 1 | 4,90075482  | AC1202 | <a href="#">DY615862</a> | <a href="#">TC94347</a>  | class III peroxidase                                                               |
| 51 | profile 2 | 3,607386615 | AC2044 | <a href="#">DY616525</a> | <a href="#">TC106656</a> | beta-glucosidase; Glycosyl hydrolase family 1                                      |
| 52 | profile 2 | 2,425738457 | AC4622 | <a href="#">DY618297</a> | <a href="#">TC107222</a> | brassinosteroid biosynthetic protein diminuto; cell elongation                     |
| 53 | profile 2 | 1,932263083 | AC1612 | <a href="#">DY616191</a> | <a href="#">TC107365</a> | glutamyl-peptide cyclotransferase; protein post-translational modification         |
| 54 | profile 2 | 1,989311802 | AC1530 | <a href="#">DY616131</a> | <a href="#">TC100802</a> | Protein of unknown function with DUF791 domain                                     |
| 55 | profile 2 | 2,680067565 | AC4716 | <a href="#">DY618372</a> | <a href="#">TC106540</a> | class III peroxidase                                                               |
| 56 | profile 2 | 2,132690607 | AC1121 | <a href="#">DY615797</a> | <a href="#">TC103583</a> | dirigent-like protein; disease resistance response protein                         |
| 57 | profile 2 | 3,070246093 | AC1174 | <a href="#">DY615840</a> | <a href="#">TC100478</a> | serine protease; subtilisin-like proteinase                                        |
| 58 | profile 2 | 5,353958163 | AC3809 | <a href="#">DY617667</a> | <a href="#">TC100589</a> | quinone oxidoreductase                                                             |
| 59 | profile 2 | 3,568896063 | AC2749 | <a href="#">DY617066</a> | <a href="#">TC100519</a> | UDP-glucosyltransferase; anthocyanidin-3-glucoside rhamnosyltransferase            |
| 60 | profile 2 | 7,161939748 | AC0143 | <a href="#">AJ388780</a> | <a href="#">TC100308</a> | aquaporin                                                                          |
| 61 | profile 2 | 2,349413382 | AC0156 | <a href="#">AJ388793</a> | <a href="#">TC106425</a> | L-ascorbate peroxidase                                                             |
| 62 | profile 2 | 2,66582142  | AC1141 | <a href="#">DY615814</a> | <a href="#">TC94364</a>  | glutathione S-transferase                                                          |
| 63 | profile 2 | 2,01128208  | AC1300 | <a href="#">DY615953</a> | <a href="#">TC106715</a> | glycine/serine hydroxymethyltransferase; amino acid transport and metabolism       |
| 64 | profile 2 | 4,177603903 | AC4494 | <a href="#">DY618204</a> | <a href="#">TC100885</a> | class III peroxidase                                                               |
| 65 | profile 2 | 6,674177139 | AC3440 | <a href="#">DY617449</a> | <a href="#">TC106496</a> | ripening related protein; Pathogenesis-related protein Bet v I family              |

|    |           |             |        |                          |                          |                                                                                           |
|----|-----------|-------------|--------|--------------------------|--------------------------|-------------------------------------------------------------------------------------------|
| 66 | profile 2 | 1,944179067 | AC0547 | <a href="#">DY615476</a> | <a href="#">TC106633</a> | 3-hydroxy-3-methylglutaryl coenzyme a reductase (HMGR1)                                   |
| 67 | profile 2 | 4,620355967 | AC1326 | <a href="#">DY615967</a> | <a href="#">TC97494</a>  | aquaporin                                                                                 |
| 68 | profile 2 | 2,346663931 | AC1018 | <a href="#">DY615729</a> | <a href="#">TC100483</a> | calmodulin                                                                                |
| 69 | profile 2 | 1,594109391 | AC0378 | <a href="#">AJ389002</a> | <a href="#">TC94131</a>  | Ras-like Sar1 GTP binding protein; intracellular protein transport                        |
| 70 | profile 2 | 1,738898254 | AC0406 | <a href="#">AJ389029</a> | <a href="#">TC100979</a> | disease resistance protein-like protein MsR1; CC-NBS-LRR class                            |
| 71 | profile 2 | 1,444282997 | AC0191 | <a href="#">AJ388825</a> | <a href="#">TC103840</a> | protein of unknown function                                                               |
| 72 | profile 2 | 1,573173061 | AC0274 | <a href="#">AJ388905</a> | <a href="#">TC106899</a> | 40S ribosomal protein S20                                                                 |
| 73 | profile 2 | 1,408161876 | AC0527 | <a href="#">DY615458</a> | <a href="#">TC107324</a> | small G-protein ROP/RAC                                                                   |
| 74 | profile 3 | 2,493032823 | AC2134 | <a href="#">DY616602</a> | <a href="#">TC107303</a> | bZIP transcription factor                                                                 |
| 75 | profile 3 | 8,759055838 | AC3794 | <a href="#">DY617654</a> | <a href="#">TC106600</a> | auxin-repressed protein of unknown function                                               |
| 76 | profile 3 | 2,469072633 | AC4796 | <a href="#">DY618428</a> | <a href="#">TC107164</a> | protein of unknown function                                                               |
| 77 | profile 3 | 2,044508588 | AC0561 | <a href="#">DY615487</a> | <a href="#">TC94532</a>  | O-diphenol-O-methyl transferase                                                           |
| 78 | profile 3 | 3,465199359 | AC3792 | <a href="#">DY617652</a> | <a href="#">TC106608</a> | protein of unknown function                                                               |
| 79 | profile 3 | 1,718115821 | AC1768 | <a href="#">DY616304</a> | singleton                | peptidase; papain; cathepsin B-like cysteine proteinase                                   |
| 80 | profile 3 | 2,208180964 | AC1824 | <a href="#">DY616353</a> | <a href="#">TC94526</a>  | protein of unknown function                                                               |
| 81 | profile 3 | 1,981241886 | AC1067 | <a href="#">DY615761</a> | <a href="#">TC100463</a> | Cinnamyl alcohol dehydrogenase                                                            |
| 82 | profile 3 | 3,529538586 | AC2351 | <a href="#">DY616766</a> | <a href="#">TC107254</a> | protein of unknown function with CBS domain                                               |
| 83 | profile 4 | 5,764768108 | AC2456 | <a href="#">DY616837</a> | <a href="#">TC109032</a> | MtN3; contains 7 transmembrane domains                                                    |
| 84 | profile 4 | 3,866165691 | AC2566 | <a href="#">DY616921</a> | <a href="#">TC94341</a>  | cytochrome P450; isopenoid hydroxylase                                                    |
| 85 | profile 4 | 4,334194709 | AC2383 | <a href="#">DY616791</a> | <a href="#">TC106707</a> | protein disulfide-isomerase (PDI)                                                         |
| 86 | profile 4 | 2,392486036 | AC4565 | <a href="#">DY618259</a> | <a href="#">TC94606</a>  | xyloglucan endotransglycosylase; cell growth                                              |
| 87 | profile 4 | 2,016240434 | AC1372 | <a href="#">DY615995</a> | <a href="#">TC109033</a> | aurora kinase; regulation of mitosis; serine/threonine-specific protein kinase            |
| 88 | profile 4 | 1,651238498 | AC1147 | <a href="#">DY615818</a> | <a href="#">TC106512</a> | 60S ribosomal protein L39                                                                 |
| 89 | profile 4 | 3,625190073 | AC2113 | <a href="#">DY616584</a> | <a href="#">TC100408</a> | tubulin alpha; cytoskeleton                                                               |
| 90 | profile 4 | 1,955636668 | AC3099 | <a href="#">DY617279</a> | <a href="#">TC106356</a> | mitochondrial heat shock 70 kDa protein; protein synthesis; protein folding               |
| 91 | profile 4 | 2,566989359 | AC0391 | <a href="#">AJ389014</a> | <a href="#">TC108193</a> | histone H4                                                                                |
| 92 | profile 4 | 2,52634809  | AC1675 | <a href="#">DY616234</a> | <a href="#">TC107228</a> | calmodulin-binding protein                                                                |
| 93 | profile 4 | 9,072096398 | AC2751 | <a href="#">DY617068</a> | <a href="#">TC100767</a> | L-asparaginase (conversion of asparagine to aspartate); nitrogen metabolism               |
| 94 | profile 4 | 1,852903683 | AC0405 | <a href="#">AJ389028</a> | <a href="#">TC108603</a> | NADH-cytochrome b5 reductase                                                              |
| 95 | profile 4 | 2,811152845 | AC1181 | <a href="#">DY615847</a> | singleton                | GRP1G; EST corresponds to 3' untranslated                                                 |
| 96 | profile 4 | 1,681223343 | AC1958 | <a href="#">DY616463</a> | <a href="#">TC112406</a> | protein of unknown function                                                               |
| 97 | profile 4 | 5,293315948 | AC2026 | <a href="#">DY616512</a> | <a href="#">TC106691</a> | secreted protein; glutamine rich cell wall protein homologous to cotton fiber proteins E6 |
| 98 | profile 4 | 2,193864035 | AC3854 | <a href="#">DY617701</a> | <a href="#">TC104788</a> | transcription factor; CCH-type zinc finger                                                |

|     |           |             |        |                          |                          |                                                                                                                                                                                        |
|-----|-----------|-------------|--------|--------------------------|--------------------------|----------------------------------------------------------------------------------------------------------------------------------------------------------------------------------------|
| 99  | profile 4 | 2,714218506 | AC1467 | <a href="#">DY616076</a> | <a href="#">TC101141</a> | histone deacetylase HD2; repression of expression; associated with cell cycle progression                                                                                              |
| 100 | profile 4 | 2,189604286 | AC1477 | <a href="#">DY616085</a> | singleton                | RING-finger-containing ubiquitin ligase                                                                                                                                                |
| 101 | profile 4 | 3,17221606  | AC1114 | <a href="#">DY615791</a> | <a href="#">TC94539</a>  | 60S ribosomal protein L6                                                                                                                                                               |
| 102 | profile 4 | 2,390893947 | AC2771 | <a href="#">DY617083</a> | <a href="#">TC106375</a> | 60S ribosomal protein L7                                                                                                                                                               |
| 103 | profile 4 | 2,875493019 | AC0310 | <a href="#">AJ388940</a> | <a href="#">TC106692</a> | 60S ribosomal protein L9                                                                                                                                                               |
| 104 | profile 4 | 2,177532824 | AC0098 | <a href="#">AJ388737</a> | <a href="#">TC94402</a>  | 40S ribosomal protein S13                                                                                                                                                              |
| 105 | profile 4 | 3,007846766 | AC3782 | <a href="#">DY617645</a> | <a href="#">TC106902</a> | 40S ribosomal protein S15a                                                                                                                                                             |
| 106 | profile 4 | 2,576334085 | AC0374 | <a href="#">AJ388998</a> | <a href="#">TC106741</a> | 40S ribosomal protein S24                                                                                                                                                              |
| 107 | profile 4 | 2,931844647 | AC2647 | <a href="#">DY616983</a> | <a href="#">TC106794</a> | T-complex protein 1 epsilon subunit (TCP-1-epsilon) (CCT-epsilon); subunit of cytosolic chaperonin; promote protein folding by using energy derived from ATP hydrolysis                |
| 108 | profile 4 | 2,664960787 | AC4226 | <a href="#">DY617997</a> | <a href="#">TC106794</a> | T-complex protein 1 epsilon subunit (TCP-1-epsilon) (CCT-epsilon); subunit of cytosolic chaperonin; promote protein folding by using energy derived from ATP hydrolysis                |
| 109 | profile 4 | 2,606753616 | AC1422 | <a href="#">DY616034</a> | singleton                | UDP-glucose glucosyltransferase                                                                                                                                                        |
| 110 | profile 4 | 1,528223937 | AC2805 | <a href="#">DY617112</a> | <a href="#">TC95942</a>  | Uridine 5'-monophosphate synthase (UMP synthase); Pyrimidine metabolism                                                                                                                |
| 111 | profile 4 | 5,85735412  | AC0358 | <a href="#">AJ388983</a> | <a href="#">TC106640</a> | ferritin, iron ion binding protein, iron homeostasis                                                                                                                                   |
| 112 | profile 4 | 2,88207529  | AC1815 | <a href="#">DY616346</a> | <a href="#">TC106674</a> | cyclophilin; peptidylprolyl cis-trans isomerase (PPIase); PPIase accelerates protein folding by catalyzing the cis-trans isomerization of the peptide bonds preceding proline residues |
| 113 | profile 4 | 2,351303921 | AC2025 | <a href="#">DY616511</a> | <a href="#">TC95495</a>  | RNA binding protein; contains a RRM domain found in proteins part of RNPs                                                                                                              |
| 114 | profile 4 | 2,470543264 | AC0042 | <a href="#">AJ388684</a> | <a href="#">TC94718</a>  | translation initiation factor 3 subunit 3 (eIF-3 gamma)                                                                                                                                |
| 115 | profile 4 | 2,527649397 | AC3765 | <a href="#">DY617632</a> | <a href="#">TC107407</a> | elongation factor 1-gamma                                                                                                                                                              |
| 116 | profile 4 | 4,005753699 | AC4448 | <a href="#">DY618172</a> | <a href="#">TC100539</a> | WD-40 repeat protein; signal transduction; expressed in nodule primordia & meristem                                                                                                    |
| 117 | profile 4 | 2,521368707 | AC1609 | <a href="#">DY616190</a> | <a href="#">TC95169</a>  | mitochondrial import receptor subunit TOM40; protein-mitochondrial targeting; mitochondrial outer membrane translocase complex                                                         |
| 118 | profile 4 | 2,639047991 | AC4092 | <a href="#">DY617889</a> | <a href="#">TC107200</a> | lysyl-tRNA synthetase                                                                                                                                                                  |
| 119 | profile 4 | 2,499246529 | AC4836 | <a href="#">DY618462</a> | <a href="#">TC100645</a> | mevalonate diphosphate decarboxylase; mevalonate pathway                                                                                                                               |
| 120 | profile 4 | 5,079627361 | AC4013 | <a href="#">DY617828</a> | <a href="#">TC107261</a> | rip1; Secretory peroxidase; Class III of the plant heme-dependent peroxidase superfamily                                                                                               |
| 121 | profile 4 | 3,929664944 | AC0043 | <a href="#">AJ389056</a> | <a href="#">TC106354</a> | polyadenylate-binding protein, positive regulation of translation                                                                                                                      |
| 122 | profile 4 | 2,293330026 | AC2731 | <a href="#">DY617052</a> | <a href="#">TC107591</a> | endo-polygalacturonase                                                                                                                                                                 |
| 123 | profile 4 | 9,101148097 | AC2810 | <a href="#">DY617117</a> | <a href="#">TC106707</a> | protein disulfide-isomerase precursor (PDI)                                                                                                                                            |
| 124 | profile 4 | 2,843658241 | AC0145 | <a href="#">AJ388782</a> | <a href="#">TC94384</a>  | sec1 translocase alpha subunit; ER protein involved in protein secretion                                                                                                               |

|     |           |             |        |                          |                          |                                                                                                                                                |
|-----|-----------|-------------|--------|--------------------------|--------------------------|------------------------------------------------------------------------------------------------------------------------------------------------|
| 125 | profile 4 | 1,722339367 | AC0110 | <a href="#">AJ388748</a> | <a href="#">TC107342</a> | ribosome biogenesis; WD repeat; mRNA processing; rRNA processing                                                                               |
| 126 | profile 4 | 2,937769445 | AC1261 | <a href="#">DY615915</a> | <a href="#">TC100411</a> | Ribosomal protein L3                                                                                                                           |
| 127 | profile 4 | 2,39311315  | AC1304 | <a href="#">DY615956</a> | <a href="#">TC94304</a>  | 60S ribosomal protein L4                                                                                                                       |
| 128 | profile 4 | 2,801555409 | AC0082 | <a href="#">AJ388722</a> | <a href="#">TC106773</a> | 60S ribosomal protein L5                                                                                                                       |
| 129 | profile 4 | 2,084549171 | AC1411 | <a href="#">DY616024</a> | <a href="#">TC94398</a>  | 26S proteasome subunit 4 AtRPT2a                                                                                                               |
| 130 | profile 4 | 3,276002669 | AC4859 | <a href="#">DY618477</a> | <a href="#">TC106368</a> | tubulin beta chain (Beta tubulin)                                                                                                              |
| 131 | profile 4 | 2,621008736 | AC3411 | <a href="#">DY617425</a> | <a href="#">TC104645</a> | UDP-glycosyltransferase; cell division activation (Woo et al., 1999 Plant Cell 11, 2303-2315)                                                  |
| 132 | profile 4 | 3,553824101 | AC0605 | <a href="#">DY615522</a> | <a href="#">TC94313</a>  | 60S ribosomal protein L19                                                                                                                      |
| 133 | profile 4 | 2,50132679  | AC1288 | <a href="#">DY615941</a> | <a href="#">TC94406</a>  | 12-oxophytodienoate reductase; jasmonic acid biosynthesis                                                                                      |
| 134 | profile 4 | 1,954462804 | AC1428 | <a href="#">DY616039</a> | <a href="#">TC94398</a>  | 26S proteasome subunit 4 AtRPT2a                                                                                                               |
| 135 | profile 4 | 2,114996019 | AC2486 | <a href="#">DY616861</a> | <a href="#">TC100179</a> | ADP-ribosylation factor (small GTPase ARF); intracellular protein transport                                                                    |
| 136 | profile 4 | 3,945629146 | AC1115 | <a href="#">DY615792</a> | <a href="#">TC106434</a> | tubulin beta; cytoskeleton                                                                                                                     |
| 137 | profile 4 | 2,210418845 | AC1936 | <a href="#">DY616445</a> | <a href="#">TC107124</a> | EF-hand Calcium binding protein; conserved plant protein                                                                                       |
| 138 | profile 4 | 2,486927332 | AC0525 | <a href="#">DY615456</a> | <a href="#">TC101346</a> | cell division control protein (cdk) 2                                                                                                          |
| 139 | profile 4 | 2,164164704 | AC0326 | <a href="#">AJ388953</a> | <a href="#">TC106500</a> | 60S ribosomal protein L18a                                                                                                                     |
| 140 | profile 4 | 2,813174408 | AC0348 | <a href="#">AJ388975</a> | <a href="#">TC93950</a>  | 60S ribosomal protein L27A                                                                                                                     |
| 141 | profile 4 | 1,679208556 | AC1446 | <a href="#">DY616057</a> | <a href="#">TC100761</a> | coatamer delta subunit (Delta COP); intracellular vesicle transport; Golgi vesicle                                                             |
| 142 | profile 4 | 5,007045486 | AC0517 | <a href="#">DY615448</a> | <a href="#">TC95953</a>  | cyclin D3                                                                                                                                      |
| 143 | profile 4 | 2,036475241 | AC1702 | <a href="#">DY616254</a> | <a href="#">TC107031</a> | cytosolic tRNA-Ala synthetase; translation; protein synthesis                                                                                  |
| 144 | profile 4 | 2,332617088 | AC0222 | <a href="#">AJ388856</a> | <a href="#">TC106485</a> | elongation factor 1-alpha, protein biosynthesis, regulation of translation                                                                     |
| 145 | profile 4 | 2,066734351 | AC2441 | <a href="#">DY616832</a> | <a href="#">TC100199</a> | translation initiation factor eIF-4A; DEAD box RNA helicase                                                                                    |
| 146 | profile 4 | 1,726836323 | AC3998 | <a href="#">DY617814</a> | <a href="#">TC95177</a>  | beta-1,3 glucanase (callose degradation)                                                                                                       |
| 147 | profile 4 | 2,16928415  | AC1627 | <a href="#">DY616202</a> | <a href="#">TC108345</a> | alpha-glucosidase; starch metabolism; Hydrolysis of terminal, non-reducing 1,4-linked alpha-D-glucose residues with release of alpha-D-glucose |
| 148 | profile 4 | 2,80590201  | AC4124 | <a href="#">DY617917</a> | <a href="#">TC94521</a>  | HSP90-like protein (SHEPHERD); Endoplasmic homolog; ER localized                                                                               |
| 149 | profile 4 | 3,118665356 | AC1383 | <a href="#">DY616001</a> | <a href="#">TC98647</a>  | heat shock protein                                                                                                                             |
| 150 | profile 4 | 2,149025015 | AC0763 | <a href="#">DY615675</a> | <a href="#">TC100786</a> | isoflavone reductase                                                                                                                           |
| 151 | profile 4 | 3,297026292 | AC0721 | <a href="#">DY615636</a> | <a href="#">TC108572</a> | MtN3-like; contains two transmembrane helices                                                                                                  |
| 152 | profile 4 | 1,295605766 | AC0234 | <a href="#">AJ388866</a> | <a href="#">TC94582</a>  | NADH-ubiquinone oxidoreductase 24 kDa subunit mitochondrial precursor; oxidative phosphorylation                                               |
| 153 | profile 4 | 4,481302834 | AC1381 | <a href="#">DY616000</a> | singleton                | protein of unknown function                                                                                                                    |
| 154 | profile 4 | 1,617049555 | AC4600 | <a href="#">DY618282</a> | <a href="#">TC102084</a> | hypothetical protein, contains 3 transmembrane domains                                                                                         |
| 155 | profile 4 | 1,749486457 | AC2250 | <a href="#">DY616696</a> | <a href="#">TC100615</a> | nucleolin; contains 2 RRM (RNA recognition motif); role in pre-rRNA transcription and ribosome assembly; role in transcriptional elongation    |
| 156 | profile 4 | 2,725879309 | AC1549 | <a href="#">DY616147</a> | <a href="#">TC106342</a> | poly-A Binding Protein; positive regulator of translation                                                                                      |

|     |           |             |        |                          |                          |                                                                                                         |
|-----|-----------|-------------|--------|--------------------------|--------------------------|---------------------------------------------------------------------------------------------------------|
| 157 | profile 4 | 1,594328176 | AC4015 | <a href="#">DY617830</a> | <a href="#">TC100933</a> | potassium ion channel regulatory beta chain with aldo-keto oxidoreductase activity                      |
| 158 | profile 4 | 1,824127139 | AC1170 | <a href="#">DY615836</a> | <a href="#">TC94135</a>  | 26S proteasome subunit RPN5a                                                                            |
| 159 | profile 4 | 2,374896623 | AC1918 | <a href="#">DY616430</a> | <a href="#">TC107025</a> | 20S proteasome alpha 6 subunit                                                                          |
| 160 | profile 4 | 3,780063682 | AC4802 | <a href="#">DY618433</a> | <a href="#">TC94066</a>  | beta-1 3-glucanase                                                                                      |
| 161 | profile 4 | 2,820979081 | AC1474 | <a href="#">DY616082</a> | <a href="#">TC94015</a>  | elongation factor EF-2; translation                                                                     |
| 162 | profile 4 | 2,293581097 | AC0284 | <a href="#">AJ388914</a> | <a href="#">TC101000</a> | protein with unknown function                                                                           |
| 163 | profile 4 | 1,499413187 | AC1927 | <a href="#">DY616438</a> | <a href="#">TC107201</a> | conserved plant protein; contains a N-terminal Sm-domain conserved in RNA binding proteins part of RNPs |
| 164 | profile 4 | 2,377236778 | AC2268 | <a href="#">DY616709</a> | <a href="#">TC94934</a>  | protein with Tetratricopeptide repeat domain (TPR); unknown function                                    |
| 165 | profile 4 | 2,106507473 | AC2425 | <a href="#">DY616823</a> | <a href="#">TC101237</a> | cop-coated vesicle membrane protein; secretory pathway                                                  |
| 166 | profile 4 | 1,998648033 | AC2621 | <a href="#">DY616963</a> | <a href="#">TC106798</a> | hypothetical protein; unknown function; DNA binding, homologous to Alba an archeal chromatin protein    |
| 167 | profile 4 | 2,562845625 | AC3191 | <a href="#">DY617323</a> | <a href="#">TC107034</a> | conserved protein of unknown function; contains transmembrane domains                                   |
| 168 | profile 4 | 1,784369115 | AC3471 | <a href="#">DY617469</a> | <a href="#">TC109490</a> | Armadillo/beta-catenin-like repeat containing protein of unknown function                               |
| 169 | profile 4 | 1,508432805 | AC0350 | <a href="#">AJ388977</a> | <a href="#">TC111704</a> | 50S ribosomal protein L21 mitochondrial precursor                                                       |
| 170 | profile 4 | 1,686288263 | AC1085 | <a href="#">DY615769</a> | <a href="#">TC100778</a> | ribosomal protein L28                                                                                   |
| 171 | profile 4 | 2,491910597 | AC2112 | <a href="#">DY616583</a> | <a href="#">TC106330</a> | 60S ribosomal protein L17                                                                               |
| 172 | profile 4 | 3,217459641 | AC2213 | <a href="#">DY616668</a> | <a href="#">TC101073</a> | 60S ribosomal protein L18                                                                               |
| 173 | profile 4 | 2,718521243 | AC2453 | <a href="#">DY616836</a> | <a href="#">TC94302</a>  | 60S ribosomal protein L4                                                                                |
| 174 | profile 4 | 2,244601802 | AC0192 | <a href="#">AJ388826</a> | <a href="#">TC94496</a>  | 60S ribosomal protein L12                                                                               |
| 175 | profile 4 | 3,019581794 | AC3032 | <a href="#">DY617253</a> | <a href="#">TC100447</a> | 60S ribosomal protein L13a-4                                                                            |
| 176 | profile 4 | 2,483991082 | AC0022 | <a href="#">AJ388670</a> | <a href="#">TC107120</a> | ribosomal protein L14; hydroxyproline-rich glycoprotein                                                 |
| 177 | profile 4 | 2,548248334 | AC0253 | <a href="#">AJ388884</a> | <a href="#">TC100421</a> | 60S ribosomal protein L15                                                                               |
| 178 | profile 4 | 3,397997303 | AC1844 | <a href="#">DY616370</a> | <a href="#">TC106334</a> | ribosomal protein L2                                                                                    |
| 179 | profile 4 | 2,384281187 | AC1052 | <a href="#">DY615753</a> | <a href="#">TC106429</a> | ribosomal L22e protein                                                                                  |
| 180 | profile 4 | 2,133535467 | AC3735 | <a href="#">DY617609</a> | <a href="#">TC94760</a>  | 60S ribosomal protein L26                                                                               |
| 181 | profile 4 | 1,850061651 | AC1542 | <a href="#">DY616141</a> | <a href="#">TC106474</a> | 60S ribosomal protein L34                                                                               |
| 182 | profile 4 | 2,381937673 | AC0114 | <a href="#">AJ388751</a> | <a href="#">TC100995</a> | 60S ribosomal protein L35                                                                               |
| 183 | profile 4 | 2,980373864 | AC0054 | <a href="#">AJ388695</a> | <a href="#">TC100531</a> | 60S ribosomal protein L6                                                                                |
| 184 | profile 4 | 2,299755803 | AC1472 | <a href="#">DY616080</a> | <a href="#">TC100719</a> | 60S acidic ribosomal protein P1                                                                         |
| 185 | profile 4 | 2,75001686  | AC1798 | <a href="#">DY616330</a> | <a href="#">TC106748</a> | 40S ribosomal protein S10                                                                               |
| 186 | profile 4 | 2,789824306 | AC1926 | <a href="#">DY616437</a> | <a href="#">TC100470</a> | 40S ribosomal protein S11                                                                               |
| 187 | profile 4 | 3,373993584 | AC1529 | <a href="#">DY616130</a> | <a href="#">TC107406</a> | 40S ribosomal protein S12                                                                               |
| 188 | profile 4 | 3,367140181 | AC0196 | <a href="#">AJ388830</a> | <a href="#">TC106824</a> | 40S ribosomal protein S15-1                                                                             |
| 189 | profile 4 | 2,618346275 | AC0377 | <a href="#">AJ389001</a> | <a href="#">TC94278</a>  | 40S ribosomal protein S2                                                                                |

|     |           |             |        |                          |                          |                                                                                                                                                                                                                                                         |
|-----|-----------|-------------|--------|--------------------------|--------------------------|---------------------------------------------------------------------------------------------------------------------------------------------------------------------------------------------------------------------------------------------------------|
| 190 | profile 4 | 2,99553378  | AC3563 | <a href="#">DY617514</a> | <a href="#">TC100931</a> | 40S ribosomal protein S20                                                                                                                                                                                                                               |
| 191 | profile 4 | 2,764133894 | AC0290 | <a href="#">AJ388920</a> | <a href="#">TC106541</a> | 40S ribosomal protein S3                                                                                                                                                                                                                                |
| 192 | profile 4 | 2,329772607 | AC1342 | <a href="#">DY615976</a> | <a href="#">TC93948</a>  | 40S ribosomal S4 protein                                                                                                                                                                                                                                |
| 193 | profile 4 | 2,634616162 | AC1746 | <a href="#">DY616284</a> | <a href="#">TC106523</a> | 40S ribosomal protein S6                                                                                                                                                                                                                                |
| 194 | profile 4 | 3,557221528 | AC2119 | <a href="#">DY616589</a> | <a href="#">TC100149</a> | 40S ribosomal protein S7                                                                                                                                                                                                                                |
| 195 | profile 4 | 1,818761075 | AC1329 | <a href="#">DY615970</a> | <a href="#">TC106644</a> | 40S ribosomal protein S9                                                                                                                                                                                                                                |
| 196 | profile 4 | 2,190300225 | AC2691 | <a href="#">DY617014</a> | <a href="#">TC108094</a> | signal peptide peptidase (SPP)                                                                                                                                                                                                                          |
| 197 | profile 4 | 1,617351458 | AC2408 | <a href="#">DY616809</a> | <a href="#">TC101217</a> | protein transport protein SEC13; secretory pathway; contains WD40 domain                                                                                                                                                                                |
| 198 | profile 4 | 1,792995521 | AC4328 | <a href="#">DY618081</a> | <a href="#">TC108419</a> | U2 small nuclear ribonucleoprotein A' (U2 snRNP-A'); RNA splicing                                                                                                                                                                                       |
| 199 | profile 4 | 3,476310816 | AC0338 | <a href="#">AJ388965</a> | <a href="#">TC106866</a> | ubiquitin / ribosomal protein CEP52 (Ubiquitin fused to ribosomal protein L40)                                                                                                                                                                          |
| 200 | profile 5 | 19,27522593 | AC0655 | <a href="#">DY615572</a> | <a href="#">TC103668</a> | protein with unknown function                                                                                                                                                                                                                           |
| 201 | profile 5 | 6,46254704  | AC2722 | <a href="#">DY617043</a> | singleton                | ubiquitin carboxyl-terminal hydrolase; deubiquitinating enzyme; MtN2                                                                                                                                                                                    |
| 202 | profile 5 | 6,018016746 | AC4482 | <a href="#">DY618196</a> | <a href="#">TC100662</a> | alcohol dehydrogenase                                                                                                                                                                                                                                   |
| 203 | profile 5 | 5,148961243 | AC2657 | <a href="#">DY616990</a> | <a href="#">TC95584</a>  | MtN9; MtMMPL1; Zinc-dependent metalloprotease; signal peptide                                                                                                                                                                                           |
| 204 | profile 5 | 18,36802283 | AC1810 | <a href="#">DY616342</a> | <a href="#">TC102486</a> | Thioredoxin S-type, (symbiotic-type); defense against oxidative stress (reducing hydrogen peroxide and certain radicals), reducing protein disulfide bonds and thereby regulation of protein (enzymes, transcription factors) functions; signal peptide |
| 205 | profile 5 | 6,869798705 | AC4780 | <a href="#">DY618415</a> | <a href="#">TC102163</a> | MtN1-like (defensin like)                                                                                                                                                                                                                               |
| 206 | profile 5 | 33,34792733 | AC1608 | <a href="#">DY616189</a> | <a href="#">TC96169</a>  | nodulin 6 (MtN6); nodulin 61 (soybean); glutamate-ammonia ligase (glutamine syntase)                                                                                                                                                                    |
| 207 | profile 5 | 10,41475901 | AC4496 | <a href="#">DY618205</a> | singleton                | protein with unknown function                                                                                                                                                                                                                           |
| 208 | profile 5 | 12,07040973 | AC2126 | <a href="#">DY616596</a> | <a href="#">TC111120</a> | protein with unknown function                                                                                                                                                                                                                           |
| 209 | profile 6 | 18,32982105 | AC4018 | <a href="#">DY617833</a> | <a href="#">TC98964</a>  | caffeic acid O-methyltransferase (catalyzes the S-adenosylmethionine-dependent O-methylation of caffeic acid to form ferulic acid (antioxidant))                                                                                                        |
| 210 | profile 6 | 19,04469603 | AC0102 | <a href="#">AJ388741</a> | <a href="#">TC94567</a>  | NCR084                                                                                                                                                                                                                                                  |
| 211 | profile 6 | 26,11458658 | AC1531 | <a href="#">DY616132</a> | singleton                | NCR145                                                                                                                                                                                                                                                  |
| 212 | profile 6 | 30,5745779  | AC3478 | <a href="#">DY617472</a> | <a href="#">TC109261</a> | NCR213                                                                                                                                                                                                                                                  |
| 213 | profile 6 | 7,985041228 | AC2302 | <a href="#">DY616733</a> | <a href="#">TC97740</a>  | NCR233                                                                                                                                                                                                                                                  |
| 214 | profile 6 | 5,787608499 | AC2067 | <a href="#">DY616542</a> | singleton                | NCR321                                                                                                                                                                                                                                                  |
| 215 | profile 6 | 7,338613812 | AC3774 | <a href="#">DY617638</a> | <a href="#">TC98265</a>  | NCR336                                                                                                                                                                                                                                                  |
| 216 | profile 6 | 11,83497238 | AC2577 | <a href="#">DY616926</a> | singleton                | NCR356                                                                                                                                                                                                                                                  |
| 217 | profile 6 | 7,500150713 | AC2834 | <a href="#">DY617139</a> | singleton                | protein with unknown function                                                                                                                                                                                                                           |

|     |           |             |        |                          |                          |                                                                                                                                                                                                                      |
|-----|-----------|-------------|--------|--------------------------|--------------------------|----------------------------------------------------------------------------------------------------------------------------------------------------------------------------------------------------------------------|
| 218 | profile 6 | 5,029945076 | AC3666 | <a href="#">DY617554</a> | singleton                | HRD ubiquitin ligase complex, ER membrane component [Posttranslational modification, protein turnover, chaperones]                                                                                                   |
| 219 | profile 6 | 4,928192698 | AC2423 | <a href="#">DY616821</a> | <a href="#">TC100662</a> | alcohol dehydrogenase                                                                                                                                                                                                |
| 220 | profile 6 | 99,8583964  | AC0131 | <a href="#">AJ388768</a> | <a href="#">TC100150</a> | carbonic anhydrase                                                                                                                                                                                                   |
| 221 | profile 6 | 43,72509995 | AC0643 | <a href="#">DY615560</a> | <a href="#">TC101756</a> | Lipase/lipoxygenase, PLAT/LH2 (interaction with lipids or membrane bound proteins), Embryo-specific protein 3, (ATS3), signal peptide; (6 nodule specific genes on genomic locus - see clones AC1452; AC3976; AC643) |
| 222 | profile 6 | 10,43015702 | AC1296 | <a href="#">DY615949</a> | <a href="#">TC100834</a> | signal peptidase 25kDa subunit (SPC25); ER; protein secretion                                                                                                                                                        |
| 223 | profile 6 | 37,93077627 | AC1371 | <a href="#">DY615994</a> | <a href="#">TC101347</a> | enod16, signal peptide, proline-rich; related to enod20                                                                                                                                                              |
| 224 | profile 6 | 8,450738123 | AC0237 | <a href="#">AJ388868</a> | <a href="#">TC100789</a> | MtN1 (defensin like)                                                                                                                                                                                                 |
| 225 | profile 6 | 23,533256   | AC0366 | <a href="#">AJ388991</a> | <a href="#">TC102128</a> | Small Nodulin Acidic RNA-binding Peptide SNARP3                                                                                                                                                                      |
| 226 | profile 6 | 11,22080129 | AC1721 | <a href="#">DY616265</a> | <a href="#">TC95535</a>  | nodule specific charged protein (100-120aa); glutamic acid (E) and lysine (K)-rich nodule specific protein from soybean; no homology                                                                                 |
| 227 | profile 6 | 2,982057887 | AC2283 | <a href="#">DY616721</a> | singleton                | secretory peroxidase; Class III of the plant heme-dependent peroxidase superfamily                                                                                                                                   |
| 228 | profile 6 | 2,022875427 | AC2974 | <a href="#">DY617220</a> | <a href="#">TC96114</a>  | conserved transmembrane protein of unknown function                                                                                                                                                                  |
| 229 | profile 6 | 5,969600764 | AC1051 | <a href="#">DY615752</a> | <a href="#">TC95076</a>  | signal peptide peptidase (SPP)                                                                                                                                                                                       |
| 230 | profile 6 | 4,343428603 | AC1676 | <a href="#">DY616235</a> | <a href="#">TC96179</a>  | MtN21; integral membrane protein; permease; transporter                                                                                                                                                              |
| 231 | profile 6 | 105,9809008 | AC1555 | <a href="#">DY616152</a> | <a href="#">TC109169</a> | MtN25 protein; signal peptide; Glycine rich protein                                                                                                                                                                  |
| 232 | profile 6 | 48,38471545 | AC1589 | <a href="#">DY616180</a> | <a href="#">TC107188</a> | MtN29 protein; Glycine rich protein                                                                                                                                                                                  |
| 233 | profile 6 | 8,21652518  | AC4024 | <a href="#">DY617837</a> | singleton                | GRP1C                                                                                                                                                                                                                |
| 234 | profile 6 | 9,75189242  | AC1002 | <a href="#">DY615716</a> | <a href="#">TC108339</a> | NCR109 (MtN28)                                                                                                                                                                                                       |
| 235 | profile 6 | 10,58990503 | AC3400 | <a href="#">DY617421</a> | <a href="#">TC95075</a>  | signal peptide peptidase (SPP)                                                                                                                                                                                       |
| 236 | profile 6 | 5,505348818 | AC0410 | <a href="#">AJ389033</a> | <a href="#">TC100580</a> | proline-rich cell wall protein                                                                                                                                                                                       |
| 237 | profile 6 | 12,52007619 | AC3895 | <a href="#">DY617729</a> | <a href="#">TC94812</a>  | UDP-sulfoquinovose synthase; Sulfolipid biosynthesis protein                                                                                                                                                         |
| 238 | profile 6 | 1,741055484 | AC1915 | <a href="#">DY616427</a> | <a href="#">TC95407</a>  | Cytokinin oxidase, FAD-binding; cytokinin inactivation and degradation                                                                                                                                               |
| 239 | profile 6 | 4,231940455 | AC3135 | <a href="#">DY617301</a> | singleton                | bZIP transcription factor TGA-type (TGACG MOTIF-BINDING)                                                                                                                                                             |
| 240 | profile 6 | 4,306548537 | AC0385 | <a href="#">AJ389008</a> | <a href="#">TC102614</a> | DNAJ protein (heat shock protein)                                                                                                                                                                                    |
| 241 | profile 6 | 2,388983036 | AC1884 | <a href="#">DY616400</a> | <a href="#">TC94919</a>  | beta-tubulin (cytoskeleton)                                                                                                                                                                                          |
| 242 | profile 6 | 3,827311973 | AC2063 | <a href="#">DY616538</a> | singleton                | POT oligo peptide, proton dependent transporter                                                                                                                                                                      |
| 243 | profile 6 | 1,725280236 | AC4827 | <a href="#">DY618455</a> | <a href="#">TC94328</a>  | UDP-glucose pyrophosphorylase; starch and sugar metabolism                                                                                                                                                           |
| 244 | profile 6 | 2,591159716 | AC2148 | <a href="#">DY616613</a> | singleton                | NADH:flavin dependent 12-oxophytodienoate-10,11-reductase) (OPDA-reductase) jasmonic acid biosynthesis                                                                                                               |
| 245 | profile 6 | 4,082165056 | AC0240 | <a href="#">AJ388871</a> | <a href="#">TC93945</a>  | ATP synthase beta chain mitochondrial precursor                                                                                                                                                                      |



|     |           |             |        |                          |                          |                                                                                                                                                                                                                      |
|-----|-----------|-------------|--------|--------------------------|--------------------------|----------------------------------------------------------------------------------------------------------------------------------------------------------------------------------------------------------------------|
| 246 | profile 6 | 10,42294217 | AC3976 | <a href="#">DY617795</a> | singleton                | Lipase/lipoxygenase, PLAT/LH2 (interaction with lipids or membrane bound proteins), Embryo-specific protein 3, (ATS3), signal peptide; (6 nodule specific genes on genomic locus - see clones AC1452; AC3976; AC643) |
| 247 | profile 6 | 7,906637969 | AC0309 | <a href="#">AJ388939</a> | <a href="#">TC94515</a>  | nodulin ENOD40                                                                                                                                                                                                       |
| 248 | profile 6 | 2,466154856 | AC0060 | <a href="#">AJ388701</a> | <a href="#">TC100309</a> | phosphopyruvate hydratase; enolase                                                                                                                                                                                   |
| 249 | profile 6 | 3,63777989  | AC2561 | <a href="#">DY616917</a> | singleton                | GATA-binding transcription factor                                                                                                                                                                                    |
| 250 | profile 6 | 5,540216568 | AC1858 | <a href="#">DY616384</a> | <a href="#">TC94194</a>  | granule-bound glycogen (Starch) synthase                                                                                                                                                                             |
| 251 | profile 6 | 2,41306495  | AC0097 | <a href="#">AJ388736</a> | <a href="#">TC100430</a> | cytosolic malate dehydrogenase                                                                                                                                                                                       |
| 252 | profile 6 | 127,3429529 | AC0024 | <a href="#">AJ388672</a> | <a href="#">TC107014</a> | MtN22, signal peptide; same genomic locus as CaM-like proteins (clone AC0344) and nodulin25 (clone AC0154)                                                                                                           |
| 253 | profile 6 | 11,07656672 | AC0210 | <a href="#">AJ388844</a> | <a href="#">TC100608</a> | MtN5 protein; lipid transfer protein                                                                                                                                                                                 |
| 254 | profile 6 | 2,890605877 | AC0259 | <a href="#">AJ388890</a> | singleton                | MRP-like ABC transporter (Glutathione S-conjugate-transporting ATPase)                                                                                                                                               |
| 255 | profile 6 | 17,29901527 | AC1912 | <a href="#">DY616424</a> | <a href="#">TC107654</a> | MtN24; conserved plant protein with transmembrane helices                                                                                                                                                            |
| 256 | profile 6 | 8,880172045 | AC0360 | <a href="#">AJ388985</a> | <a href="#">TC109579</a> | protein of unknown function with DUF640 domain                                                                                                                                                                       |
| 257 | profile 6 | 5,881307981 | AC3954 | <a href="#">DY617778</a> | <a href="#">TC109112</a> | CBS, Phox and Bem1p domains-containing protein; signal transduction protein of unknown function                                                                                                                      |
| 258 | profile 6 | 3,669823098 | AC4398 | <a href="#">DY618136</a> | <a href="#">TC110990</a> | conserved protein of unknown function                                                                                                                                                                                |
| 259 | profile 6 | 18,23460853 | AC4151 | <a href="#">DY617937</a> | <a href="#">TC96630</a>  | remorin; plant-specific membrane associated and lipid rafts associated protein of unknown function; phospho-protein; signalling                                                                                      |
| 260 | profile 6 | 5,143584961 | AC2150 | <a href="#">DY616615</a> | <a href="#">TC95444</a>  | pathogenesis related protein of unknown function; PR-1 like; signal peptide and extracellular SCP domain conserved in plant and human immune system                                                                  |
| 261 | profile 6 | 3,164103176 | AC0257 | <a href="#">AJ388888</a> | <a href="#">TC100410</a> | sucrose synthase                                                                                                                                                                                                     |
| 262 | profile 6 | 3,499784262 | AC1424 | <a href="#">DY616036</a> | singleton                | peptide/amino acid transporter                                                                                                                                                                                       |
| 263 | profile 6 | 1,87590363  | AC1940 | <a href="#">DY616448</a> | <a href="#">TC95445</a>  | actin depolymerizing factor (ADF)/cofilin; cytoskeleton                                                                                                                                                              |
| 264 | profile 6 | 6,662455917 | AC4175 | <a href="#">DY617957</a> | singleton                | caffeic acid O-methyltransferase (catalyzes the S-adenosylmethionine-dependent O-methylation of caffeic acid to form ferulic acid (antioxidant))                                                                     |
| 265 | profile 6 | 7,428367205 | AC1116 | <a href="#">DY615793</a> | singleton                | defensin-like peptide                                                                                                                                                                                                |
| 266 | profile 6 | 6,686255308 | AC3835 | <a href="#">DY617690</a> | singleton                | ER lumen protein retaining receptor                                                                                                                                                                                  |
| 267 | profile 6 | 2,340261495 | AC1722 | <a href="#">DY616266</a> | singleton                | fructokinase; glycolysis                                                                                                                                                                                             |
| 268 | profile 6 | 3,728430031 | AC0029 | <a href="#">AJ388674</a> | <a href="#">TC106913</a> | glutamine synthetase                                                                                                                                                                                                 |
| 269 | profile 6 | 9,339259817 | AC0064 | <a href="#">AJ388705</a> | singleton                | no ORF in EST; homologous to the 3' end of the GRP5B                                                                                                                                                                 |
| 270 | profile 6 | 3,425509916 | AC4107 | <a href="#">DY617902</a> | <a href="#">TC102728</a> | transcription factor; C2H2-type zinc finger protein                                                                                                                                                                  |
| 271 | profile 6 | 5,190849615 | AC2154 | <a href="#">DY616619</a> | <a href="#">TC109630</a> | secreted protein of unknown function related to MtN26                                                                                                                                                                |
| 272 | profile 6 | 8,105085346 | AC1277 | <a href="#">DY615931</a> | <a href="#">TC97495</a>  | NCR237                                                                                                                                                                                                               |
| 273 | profile 6 | 4,798950838 | AC1455 | <a href="#">DY616066</a> | singleton                | NCR110                                                                                                                                                                                                               |
| 274 | profile 6 | 6,172296079 | AC2863 | <a href="#">DY617157</a> | singleton                | NCR128                                                                                                                                                                                                               |

|     |           |             |        |                          |                          |                                                                                                                          |
|-----|-----------|-------------|--------|--------------------------|--------------------------|--------------------------------------------------------------------------------------------------------------------------|
| 275 | profile 6 | 4,946650905 | AC2612 | <a href="#">DY616956</a> | <a href="#">TC97025</a>  | NCR201                                                                                                                   |
| 276 | profile 6 | 11,45883558 | AC0242 | <a href="#">AJ388873</a> | <a href="#">TC102095</a> | NCR206                                                                                                                   |
| 277 | profile 6 | 9,189584705 | AC2884 | <a href="#">DY617169</a> | singleton                | NCR351                                                                                                                   |
| 278 | profile 6 | 5,621985001 | AC2494 | <a href="#">DY616867</a> | singleton                | NCR327                                                                                                                   |
| 279 | profile 6 | 16,77020542 | AC4473 | <a href="#">DY618190</a> | <a href="#">TC110997</a> | NCR339                                                                                                                   |
| 280 | profile 6 | 4,741606399 | AC4075 | <a href="#">DY617875</a> | singleton                | NCR342                                                                                                                   |
| 281 | profile 6 | 2,085419686 | AC0353 | <a href="#">AJ388979</a> | <a href="#">TC106697</a> | nucleoside diphosphate kinase I (NDK I) (NDP kinase I) (NDPK I)                                                          |
| 282 | profile 6 | 2,197736842 | AC1099 | <a href="#">DY615778</a> | <a href="#">TC95756</a>  | conserved protein of unknown function                                                                                    |
| 283 | profile 6 | 2,491043547 | AC1108 | <a href="#">DY615786</a> | <a href="#">TC95643</a>  | protein of unknown function , conserved in plants                                                                        |
| 284 | profile 6 | 5,002835419 | AC2376 | <a href="#">DY616786</a> | <a href="#">TC95075</a>  | signal peptide peptidase (SPP)                                                                                           |
| 285 | profile 6 | 3,866558726 | AC4515 | <a href="#">DY618219</a> | singleton                | NCR340                                                                                                                   |
| 286 | profile 6 | 3,824966036 | AC1278 | <a href="#">DY615932</a> | <a href="#">TC95087</a>  | alpha-1,4 glucan phosphorylase L isozyme, chloroplast/amyloplast precursor                                               |
| 287 | profile 6 | 5,301270053 | AC3122 | <a href="#">DY617294</a> | <a href="#">TC95550</a>  | aspartyl (acid) protease; secreted                                                                                       |
| 288 | profile 6 | 6,724880925 | AC0505 | <a href="#">DY615436</a> | <a href="#">TC100731</a> | enod20; proline-rich; related to enod16                                                                                  |
| 289 | profile 6 | 8,114013977 | AC4126 | <a href="#">DY617919</a> | singleton                | ER lumen protein retaining receptor                                                                                      |
| 290 | profile 6 | 3,263754525 | AC2590 | <a href="#">DY616937</a> | <a href="#">TC94500</a>  | ferritin 2 chloroplast precursor                                                                                         |
| 291 | profile 6 | 13,07507354 | AC4626 | <a href="#">DY618300</a> | <a href="#">TC108069</a> | NCR119                                                                                                                   |
| 292 | profile 6 | 6,133029594 | AC2461 | <a href="#">DY616841</a> | <a href="#">TC100321</a> | NCR123                                                                                                                   |
| 293 | profile 6 | 24,25362815 | AC1502 | <a href="#">DY616107</a> | <a href="#">TC95912</a>  | NCR220 (MtN27)                                                                                                           |
| 294 | profile 6 | 4,808400033 | AC4051 | <a href="#">DY617856</a> | <a href="#">TC96632</a>  | NCR244                                                                                                                   |
| 295 | profile 6 | 5,205014529 | AC1544 | <a href="#">DY616143</a> | singleton                | NCR319                                                                                                                   |
| 296 | profile 6 | 10,21414864 | AC2212 | <a href="#">DY616667</a> | singleton                | NCR326                                                                                                                   |
| 297 | profile 6 | 10,40863076 | AC3467 | <a href="#">DY617465</a> | <a href="#">TC107275</a> | protein of unknown function                                                                                              |
| 298 | profile 6 | 2,72778908  | AC2666 | <a href="#">DY616997</a> | singleton                | NCR347                                                                                                                   |
| 299 | profile 6 | 27,02906357 | AC1954 | <a href="#">DY616460</a> | singleton                | allantoin (Ureide) permease (L. japonicus is an amide transporter; soybean is an ureide transporter)                     |
| 300 | profile 6 | 5,273996307 | AC4100 | <a href="#">DY617895</a> | singleton                | TIR domain protein; resistance                                                                                           |
| 301 | profile 6 | 2,379315661 | AC1232 | <a href="#">DY615889</a> | <a href="#">TC96933</a>  | UV-damaged DNA binding factor; re-mRNA cleavage and polyadenylation specificity factor [RNA processing and modification] |
| 302 | profile 6 | 5,645284139 | AC2694 | <a href="#">DY617017</a> | singleton                | transcription factor; nodule inception protein (nin)                                                                     |
| 303 | profile 6 | 3,356145003 | AC2155 | <a href="#">DY616620</a> | <a href="#">TC96274</a>  | secreted aspartyl protease ( pepsin A)                                                                                   |
| 304 | profile 6 | 2,722717613 | AC0277 | <a href="#">AJ388908</a> | <a href="#">TC103041</a> | allantoin (Ureide) permease (L. japonicus is an amide transporter; soybean is an ureide transporter)                     |
| 305 | profile 6 | 2,401611144 | AC3480 | <a href="#">DY617474</a> | <a href="#">TC96501</a>  | bHLH transcription factor                                                                                                |
| 306 | profile 6 | 2,009581345 | AC3497 | <a href="#">DY617484</a> | <a href="#">TC96184</a>  | protein of unknown function                                                                                              |
| 307 | profile 6 | 2,723878652 | AC3822 | <a href="#">DY617677</a> | <a href="#">TC107034</a> | conserved protein of unknown function                                                                                    |

|     |           |             |        |                          |                          |                                                                                                       |
|-----|-----------|-------------|--------|--------------------------|--------------------------|-------------------------------------------------------------------------------------------------------|
| 308 | profile 6 | 2,184394992 | AC4299 | <a href="#">DY618058</a> | <a href="#">TC109990</a> | protein phosphatase 2C; serine/threonine phosphatase; signal transduction                             |
| 309 | profile 6 | 16,65924545 | AC1377 | <a href="#">DY615997</a> | <a href="#">TC96231</a>  | signal peptidase 22kDa subunit (SPC22); ER; protein secretion                                         |
| 310 | profile 6 | 11,70859234 | AC2699 | <a href="#">DY617021</a> | <a href="#">TC95981</a>  | transcription factor CCAAT-binding nuclear factor Y subunit (HAP2); Combiar et al., 2006              |
| 311 | profile 6 | 3,545786817 | AC4480 | <a href="#">DY618194</a> | <a href="#">TC95480</a>  | conserved protein, unknown function                                                                   |
| 312 | profile 6 | 2,208805129 | AC1701 | <a href="#">DY616253</a> | <a href="#">TC96544</a>  | MtN21-like; integral membrane protein; permease; transporter; conserved in plants                     |
| 313 | profile 6 | 3,17234287  | AC0105 | <a href="#">AJ388744</a> | <a href="#">TC100510</a> | 40S ribosomal protein S8                                                                              |
| 314 | profile 6 | 1,966915064 | AC3093 | <a href="#">DY617276</a> | <a href="#">TC94731</a>  | glucose-6-phosphate/phosphate translocator                                                            |
| 315 | profile 6 | 1,995369601 | AC4577 | <a href="#">DY618266</a> | <a href="#">TC103210</a> | kinesin                                                                                               |
| 316 | profile 6 | 1,977830874 | AC1205 | <a href="#">DY615865</a> | singleton                | Mitochondrial carrier protein; transport of metabolites in and out the mitochondrion                  |
| 317 | profile 6 | 1,783927978 | AC3807 | <a href="#">DY617665</a> | <a href="#">TC108396</a> | protein of unknown function with ribosomal protein S6 domain                                          |
| 318 | profile 7 | 63,69778309 | AC1444 | <a href="#">DY616055</a> | <a href="#">TC95391</a>  | leghemoglobin 29                                                                                      |
| 319 | profile 7 | 24,71569945 | AC1816 | <a href="#">DY616347</a> | <a href="#">TC109065</a> | NCR028                                                                                                |
| 320 | profile 7 | 42,37187086 | AC1083 | <a href="#">DY615767</a> | <a href="#">TC110997</a> | NCR306                                                                                                |
| 321 | profile 7 | 20,62539189 | AC0279 | <a href="#">AJ388910</a> | <a href="#">TC94903</a>  | NCR095                                                                                                |
| 322 | profile 7 | 33,4194598  | AC3921 | <a href="#">DY617752</a> | <a href="#">TC100432</a> | enod8; suger esterase                                                                                 |
| 323 | profile 7 | 27,22770706 | AC0081 | <a href="#">AJ388721</a> | <a href="#">TC100432</a> | enod8; suger esterase                                                                                 |
| 324 | profile 7 | 8,579333275 | AC3505 | <a href="#">DY617487</a> | <a href="#">TC95255</a>  | nodule specific lectin; homologous to PsNlec1                                                         |
| 325 | profile 7 | 106,7004289 | AC0304 | <a href="#">AJ388934</a> | <a href="#">TC107718</a> | GRP3A, nodule-specific glycine-rich protein 3                                                         |
| 326 | profile 7 | 9,027415238 | AC0074 | <a href="#">AJ388715</a> | <a href="#">TC106138</a> | MtN20 like                                                                                            |
| 327 | profile 7 | 43,88648739 | AC0123 | <a href="#">AJ388760</a> | <a href="#">TC94240</a>  | NCR053                                                                                                |
| 328 | profile 7 | 27,51067031 | AC2581 | <a href="#">DY616929</a> | <a href="#">TC97251</a>  | NCR140                                                                                                |
| 329 | profile 7 | 21,90117457 | AC0164 | <a href="#">AJ388801</a> | <a href="#">TC101084</a> | NCR165                                                                                                |
| 330 | profile 7 | 16,68211431 | AC2098 | <a href="#">DY616570</a> | <a href="#">TC101764</a> | NCR172                                                                                                |
| 331 | profile 7 | 14,80042842 | AC1086 | <a href="#">DY615770</a> | <a href="#">TC94693</a>  | NCR316                                                                                                |
| 332 | profile 7 | 55,09728143 | AC2724 | <a href="#">DY617045</a> | singleton                | NCR331                                                                                                |
| 333 | profile 7 | 11,2675428  | AC4165 | <a href="#">DY617948</a> | <a href="#">TC107718</a> | GRP3                                                                                                  |
| 334 | profile 7 | 24,77324247 | AC0418 | <a href="#">AJ389041</a> | <a href="#">TC100851</a> | nodulin 26 aquaporin; symbiosome membrane protein                                                     |
| 335 | profile 7 | 2,578684595 | AC1113 | <a href="#">DY615790</a> | <a href="#">TC101191</a> | prolyl 4-hydroxylase alpha subunit; protein maturation in ER                                          |
| 336 | profile 7 | 10,45720407 | AC1540 | <a href="#">DY616139</a> | <a href="#">TC101252</a> | sulfate transporter (orthologue of L. japonicus Sst1; Krussell et al., 2005 Plant Cell 17: 1625-1636) |
| 337 | profile 7 | 136,091272  | AC0215 | <a href="#">AJ388849</a> | <a href="#">TC106591</a> | leghemoglobin                                                                                         |
| 338 | profile 7 | 25,84179179 | AC1195 | <a href="#">DY615857</a> | singleton                | NCR042                                                                                                |
| 339 | profile 7 | 35,41102561 | AC2999 | <a href="#">DY617232</a> | <a href="#">TC94003</a>  | NCR164                                                                                                |

|     |           |             |        |                          |                          |                                                                                                                       |
|-----|-----------|-------------|--------|--------------------------|--------------------------|-----------------------------------------------------------------------------------------------------------------------|
| 340 | profile 7 | 28,60049739 | AC2195 | <a href="#">DY616651</a> | singleton                | NCR325                                                                                                                |
| 341 | profile 7 | 17,2963192  | AC1291 | <a href="#">DY615944</a> | singleton                | NCR343                                                                                                                |
| 342 | profile 7 | 8,46142504  | AC0347 | <a href="#">AJ388974</a> | singleton                | NCR135                                                                                                                |
| 343 | profile 7 | 5,55617843  | AC3990 | <a href="#">DY617807</a> | <a href="#">TC101021</a> | 26S proteasome regulatory particle chain RPT6; ATPase; binds ubiquitin protein ligases                                |
| 344 | profile 7 | 3,59962499  | AC3212 | <a href="#">DY617337</a> | singleton                | transmembrane amino acid transporter protein; amino acid permease                                                     |
| 345 | profile 7 | 11,13905288 | AC2344 | <a href="#">DY616761</a> | <a href="#">TC102092</a> | carbonic anhydrase, nodule specific                                                                                   |
| 346 | profile 7 | 11,00122375 | AC1452 | <a href="#">DY616063</a> | singleton                | lipase/lipoxygenase, PLAT/LH2 (interaction with lipids or membrane bound proteins), Embryo-specific protein 3, (ATS3) |
| 347 | profile 7 | 22,52086872 | AC0376 | <a href="#">AJ389000</a> | singleton                | GRP                                                                                                                   |
| 348 | profile 7 | 109,1978476 | AC1220 | <a href="#">DY615879</a> | <a href="#">TC111259</a> | GRP1L                                                                                                                 |
| 349 | profile 7 | 15,66489484 | AC4651 | <a href="#">DY618319</a> | <a href="#">TC107043</a> | Universal stress protein (Usp); induced upon stress; increase survival upon stress                                    |
| 350 | profile 7 | 14,59222326 | AC2037 | <a href="#">DY616518</a> | <a href="#">TC101259</a> | GATA-binding transcription factor (Zn finger)                                                                         |
| 351 | profile 7 | 4,830428198 | AC0585 | <a href="#">DY615505</a> | <a href="#">TC107287</a> | hexose transporter protein                                                                                            |
| 352 | profile 7 | 97,62000373 | AC3629 | <a href="#">DY617527</a> | <a href="#">TC94045</a>  | histone H2B                                                                                                           |
| 353 | profile 7 | 14,99776419 | AC4419 | <a href="#">DY618152</a> | <a href="#">TC98260</a>  | lipase/esterase; similar to enod8                                                                                     |
| 354 | profile 7 | 129,0347818 | AC0020 | <a href="#">AJ388668</a> | <a href="#">TC106578</a> | leghemoglobin 2                                                                                                       |
| 355 | profile 7 | 135,3227147 | AC0108 | <a href="#">AJ388746</a> | <a href="#">TC106593</a> | leghemoglobin                                                                                                         |
| 356 | profile 7 | 51,08288559 | AC0130 | <a href="#">AJ388767</a> | <a href="#">TC106592</a> | leghemoglobin 1                                                                                                       |
| 357 | profile 7 | 95,37935568 | AC0146 | <a href="#">AJ388783</a> | <a href="#">TC106579</a> | leghemoglobin                                                                                                         |
| 358 | profile 7 | 115,8242723 | AC0224 | <a href="#">AJ388857</a> | <a href="#">TC100586</a> | leghemoglobin 29                                                                                                      |
| 359 | profile 7 | 64,71199693 | AC1071 | <a href="#">DY615763</a> | <a href="#">TC106587</a> | leghemoglobin                                                                                                         |
| 360 | profile 7 | 26,3914911  | AC3245 | <a href="#">DY617357</a> | singleton                | amino acid transporter; Lysine and histidine specific transporter; amino acid permease                                |
| 361 | profile 7 | 24,41770326 | AC0288 | <a href="#">AJ388918</a> | <a href="#">TC94518</a>  | enod2/nodulin75/N8 (other nodule specific homologue:TC106596)                                                         |
| 362 | profile 7 | 8,903604622 | AC1890 | <a href="#">DY616405</a> | <a href="#">TC103322</a> | NCR081                                                                                                                |
| 363 | profile 7 | 15,56958725 | AC1379 | <a href="#">DY615998</a> | <a href="#">TC106595</a> | NCR086                                                                                                                |
| 364 | profile 7 | 6,543374842 | AC0212 | <a href="#">AJ388846</a> | <a href="#">TC100607</a> | NCR094                                                                                                                |
| 365 | profile 7 | 7,743300495 | AC3386 | <a href="#">DY617415</a> | <a href="#">TC101238</a> | NCR103                                                                                                                |
| 366 | profile 7 | 21,08831396 | AC0263 | <a href="#">AJ388894</a> | <a href="#">TC102899</a> | NCR105                                                                                                                |
| 367 | profile 7 | 6,560819034 | AC3021 | <a href="#">DY617244</a> | singleton                | NCR278                                                                                                                |
| 368 | profile 7 | 17,19422103 | AC2542 | <a href="#">DY616904</a> | singleton                | NCR329                                                                                                                |
| 369 | profile 7 | 24,15418448 | AC1635 | <a href="#">DY616207</a> | <a href="#">TC104158</a> | Mitogen Activated Kinase (MAPK)                                                                                       |
| 370 | profile 7 | 222,8350203 | AC0154 | <a href="#">AJ388791</a> | <a href="#">TC106696</a> | nodulin 25                                                                                                            |
| 371 | profile 7 | 12,39378825 | AC1658 | <a href="#">DY616222</a> | <a href="#">TC108598</a> | phosphoethanolamine N-methyltransferase                                                                               |
| 372 | profile 7 | 5,748646447 | AC0091 | <a href="#">AJ388730</a> | <a href="#">TC95187</a>  | proline rich protein                                                                                                  |

|     |           |             |        |                          |                          |                                                                                                                                                        |
|-----|-----------|-------------|--------|--------------------------|--------------------------|--------------------------------------------------------------------------------------------------------------------------------------------------------|
| 373 | profile 7 | 9,146754987 | AC1132 | <a href="#">DY615806</a> | <a href="#">TC100814</a> | protein of unknown function                                                                                                                            |
| 374 | profile 7 | 7,490510935 | AC1672 | <a href="#">DY616232</a> | <a href="#">TC107129</a> | Universal stress protein (Usp); induced upon stress; increase survival upon stress                                                                     |
| 375 | profile 7 | 8,502222071 | AC3325 | <a href="#">DY617391</a> | <a href="#">TC109930</a> | IQ calmodulin-binding protein                                                                                                                          |
| 376 | profile 7 | 20,38870687 | AC4391 | <a href="#">DY618132</a> | singleton                | complex I intermediate-associated protein 30; chaperone protein involved in the assembly of the mitochondrial NADH:ubiquinone oxidoreductase complex I |
| 377 | profile 7 | 16,30544737 | AC4415 | <a href="#">DY618148</a> | singleton                | conserved protein of unknown function; contains transmembrane domains                                                                                  |
| 378 | profile 7 | 74,62462479 | AC0113 | <a href="#">AJ389051</a> | <a href="#">TC102213</a> | protein of unknown function, contains ankyrin repeats (protein-protein interactions)                                                                   |
| 379 | profile 7 | 9,57289634  | AC0580 | <a href="#">DY615500</a> | <a href="#">TC98374</a>  | wound induced protein of unknown function                                                                                                              |
| 380 | profile 7 | 6,630154893 | AC0233 | <a href="#">AJ388865</a> | <a href="#">TC93925</a>  | triosephosphate isomerase                                                                                                                              |
| 381 | profile 7 | 3,195495136 | AC1864 | <a href="#">DY616387</a> | <a href="#">TC100894</a> | NCR032                                                                                                                                                 |
| 382 | profile 7 | 9,0306047   | AC3917 | <a href="#">DY617748</a> | <a href="#">TC107608</a> | NCR035                                                                                                                                                 |
| 383 | profile 7 | 13,51518013 | AC0189 | <a href="#">AJ388823</a> | <a href="#">TC97593</a>  | NCR102                                                                                                                                                 |
| 384 | profile 7 | 27,85873079 | AC1412 | <a href="#">DY616025</a> | singleton                | NCR317                                                                                                                                                 |
| 385 | profile 7 | 16,57395632 | AC1953 | <a href="#">DY616459</a> | singleton                | NCR344                                                                                                                                                 |
| 386 | profile 7 | 5,019345206 | AC1390 | <a href="#">DY616006</a> | singleton                | Prolyl 4-hydroxylase, alpha subunit                                                                                                                    |
| 387 | profile 7 | 6,342441963 | AC2638 | <a href="#">DY616978</a> | singleton                | RING/C3HC4/PHD zinc finger protein; ubiquitin protein ligase                                                                                           |
| 388 | profile 7 | 7,41178202  | AC3933 | <a href="#">DY617763</a> | singleton                | N-21 (soybean) homologue; conserved protein in plants; integral membrane protein                                                                       |
| 389 | profile 7 | 3,209581849 | AC0258 | <a href="#">AJ388889</a> | <a href="#">TC110049</a> | pyridoxal kinase; vitamin B6 synthesis                                                                                                                 |
| 390 | profile 7 | 3,138861759 | AC3490 | <a href="#">DY617480</a> | <a href="#">TC106719</a> | SGT1; regulation of cell division; SCF-mediated ubiquitination of proteins; pathogen resistance; functions as a cochaperone                            |
| 391 | profile 8 | 37,64911232 | AC0287 | <a href="#">AJ388917</a> | <a href="#">TC93931</a>  | basic blue copper-binding protein, electron transport                                                                                                  |
| 392 | profile 8 | 7,106802376 | AC2105 | <a href="#">DY616577</a> | <a href="#">TC95710</a>  | NCR018                                                                                                                                                 |
| 393 | profile 8 | 14,62071212 | AC0262 | <a href="#">AJ388893</a> | <a href="#">TC104756</a> | NCR169                                                                                                                                                 |
| 394 | profile 8 | 33,80619559 | AC3355 | <a href="#">DY617401</a> | singleton                | NCR333                                                                                                                                                 |
| 395 | profile 8 | 4,467332624 | AC1297 | <a href="#">DY615950</a> | <a href="#">TC108792</a> | protein of unknown function; similar to pathogenesis-related protein                                                                                   |
| 396 | profile 8 | 4,403595099 | AC3455 | <a href="#">DY617456</a> | <a href="#">TC107024</a> | ARG10; protein of unknown function; responsive to auxin and aluminium; possible asparagine synthetase                                                  |
| 397 | profile 8 | 6,012418913 | AC1807 | <a href="#">DY616339</a> | <a href="#">TC106729</a> | glutamine synthetase                                                                                                                                   |
| 398 | profile 8 | 87,84422988 | AC0068 | <a href="#">AJ388709</a> | <a href="#">TC106577</a> | NCR001                                                                                                                                                 |
| 399 | profile 8 | 39,00829529 | AC3183 | <a href="#">DY617319</a> | <a href="#">TC101991</a> | NCR003                                                                                                                                                 |
| 400 | profile 8 | 35,9568433  | AC0312 | <a href="#">AJ388941</a> | <a href="#">TC94540</a>  | NCR019                                                                                                                                                 |
| 401 | profile 8 | 34,03871611 | AC1715 | <a href="#">DY616261</a> | <a href="#">TC102115</a> | NCR072                                                                                                                                                 |
| 402 | profile 8 | 12,19466106 | AC1960 | <a href="#">DY616464</a> | <a href="#">TC107422</a> | NCR160                                                                                                                                                 |
| 403 | profile 8 | 15,51400378 | AC1140 | <a href="#">DY615813</a> | singleton                | NCR287                                                                                                                                                 |

|     |           |             |        |                          |                          |                                                                                                                    |
|-----|-----------|-------------|--------|--------------------------|--------------------------|--------------------------------------------------------------------------------------------------------------------|
| 404 | profile 8 | 15,60170168 | AC0390 | <a href="#">AJ389013</a> | singleton                | NCR312                                                                                                             |
| 405 | profile 8 | 16,62496821 | AC0193 | <a href="#">AJ388827</a> | singleton                | endoplasmic reticulum retrieval protein RER1, protein secretion                                                    |
| 406 | profile 8 | 6,01513388  | AC0356 | <a href="#">AJ388981</a> | singleton                | protein of unknown function                                                                                        |
| 407 | profile 8 | 13,84246425 | AC1670 | <a href="#">DY616230</a> | singleton                | protein of unknown function                                                                                        |
| 408 | profile 8 | 2,881206358 | AC0205 | <a href="#">AJ388839</a> | <a href="#">TC94720</a>  | conserved protein of unknown function                                                                              |
| 409 | profile 8 | 2,748456247 | AC2187 | <a href="#">DY616646</a> | <a href="#">TC107737</a> | wound induced protein (91aa) of unknown function; conserved in plants                                              |
| 410 | profile 8 | 5,265363081 | AC2625 | <a href="#">DY616967</a> | <a href="#">TC94674</a>  | alternative respiratory pathway oxidase                                                                            |
| 411 | profile 8 | 3,827665761 | AC0129 | <a href="#">AJ388766</a> | <a href="#">TC111984</a> | low affinity sulfate transporter 3                                                                                 |
| 412 | profile 8 | 8,249763865 | AC3923 | <a href="#">DY617754</a> | <a href="#">TC108713</a> | NCR002                                                                                                             |
| 413 | profile 8 | 28,23136343 | AC1489 | <a href="#">DY616094</a> | <a href="#">TC94921</a>  | NCR006                                                                                                             |
| 414 | profile 8 | 22,81907609 | AC0169 | <a href="#">AJ388805</a> | <a href="#">TC108507</a> | NCR009                                                                                                             |
| 415 | profile 8 | 43,15085048 | AC2317 | <a href="#">DY616738</a> | <a href="#">TC108455</a> | NCR040                                                                                                             |
| 416 | profile 8 | 9,585135008 | AC2411 | <a href="#">DY616812</a> | singleton                | NCR079                                                                                                             |
| 417 | profile 8 | 17,33485481 | AC0093 | <a href="#">AJ388732</a> | <a href="#">TC107446</a> | NCR099                                                                                                             |
| 418 | profile 8 | 78,30321637 | AC0286 | <a href="#">AJ388916</a> | singleton                | NCR108                                                                                                             |
| 419 | profile 8 | 41,2858991  | AC0133 | <a href="#">AJ388770</a> | <a href="#">TC100865</a> | NCR113                                                                                                             |
| 420 | profile 8 | 9,909119334 | AC1228 | <a href="#">DY615887</a> | <a href="#">TC95930</a>  | NCR219                                                                                                             |
| 421 | profile 8 | 14,92545848 | AC2622 | <a href="#">DY616964</a> | singleton                | NCR330                                                                                                             |
| 422 | profile 8 | 4,381587106 | AC4472 | <a href="#">DY618189</a> | singleton                | NCR338                                                                                                             |
| 423 | profile 8 | 5,883695805 | AC1262 | <a href="#">DY615916</a> | <a href="#">TC108269</a> | GcpE; 1-hydroxy-2-methyl-2-(E)-butenyl 4-diphosphate synthase for plastid isoprenoid synthesis via the MEP pathway |
| 424 | profile 8 | 8,533649547 | AC2498 | <a href="#">DY616870</a> | <a href="#">TC108234</a> | Class III peroxidase (homologous to rip1)                                                                          |
| 425 | profile 8 | 4,88761657  | AC1358 | <a href="#">DY615983</a> | <a href="#">TC111751</a> | polypyrimidine tract-binding protein; mRNA processing; mRNA splicing                                               |
| 426 | profile 8 | 57,87591911 | AC3640 | <a href="#">DY617534</a> | <a href="#">TC108455</a> | NCR040                                                                                                             |
| 427 | profile 8 | 3,65580492  | AC4692 | <a href="#">DY618351</a> | <a href="#">TC95234</a>  | auxin responsive SAUR protein                                                                                      |
| 428 | profile 8 | 28,09038067 | AC0344 | <a href="#">AJ388971</a> | <a href="#">TC101807</a> | calmodulin-like protein                                                                                            |
| 429 | profile 8 | 45,69284886 | AC0049 | <a href="#">AJ388690</a> | <a href="#">TC107339</a> | enod18; cytosolic, potential ATP binding protein                                                                   |
| 430 | profile 8 | 4,168371146 | AC1185 | <a href="#">DY615850</a> | <a href="#">TC94780</a>  | NADH-dependent glutamate synthase                                                                                  |
| 431 | profile 8 | 3,388117556 | AC1805 | <a href="#">DY616337</a> | singleton                | protein of unknown function                                                                                        |
| 432 | profile 8 | 4,27954299  | AC3838 | <a href="#">DY617693</a> | <a href="#">TC101134</a> | mannosyl-oligosaccharide 1 2-alpha-mannosidase                                                                     |
| 433 | profile 8 | 10,59781415 | AC4342 | <a href="#">DY618094</a> | <a href="#">TC94421</a>  | NCR007                                                                                                             |
| 434 | profile 8 | 19,5992627  | AC0230 | <a href="#">AJ388862</a> | <a href="#">TC108178</a> | NCR036                                                                                                             |
| 435 | profile 8 | 6,759928825 | AC1573 | <a href="#">DY616167</a> | <a href="#">TC95706</a>  | NCR097                                                                                                             |
| 436 | profile 8 | 24,01424731 | AC0239 | <a href="#">AJ388870</a> | singleton                | NCR125                                                                                                             |
| 437 | profile 8 | 21,29897256 | AC1253 | <a href="#">DY615907</a> | <a href="#">TC101763</a> | NCR159                                                                                                             |
| 438 | profile 8 | 6,616136465 | AC0571 | <a href="#">DY615493</a> | <a href="#">TC111268</a> | NCR230                                                                                                             |

|     |           |             |        |                          |                          |                                                                                                                            |
|-----|-----------|-------------|--------|--------------------------|--------------------------|----------------------------------------------------------------------------------------------------------------------------|
| 439 | profile 8 | 75,23900331 | AC1413 | <a href="#">DY616026</a> | <a href="#">TC106362</a> | NCR269                                                                                                                     |
| 440 | profile 8 | 15,92486911 | AC2102 | <a href="#">DY616574</a> |                          | NCR324                                                                                                                     |
| 441 | profile 8 | 3,414304076 | AC0664 | <a href="#">DY615580</a> |                          | protein of unknown function                                                                                                |
| 442 | profile 8 | 5,138481472 | AC2432 | <a href="#">DY616829</a> |                          | protein of unknown function                                                                                                |
| 443 | profile 8 | 3,39849701  | AC2088 | <a href="#">DY616562</a> | <a href="#">TC95035</a>  | AP2/EREBP transcription factor                                                                                             |
| 444 | profile 8 | 14,37076067 | AC3165 | <a href="#">DY617311</a> | <a href="#">TC108316</a> | Small Nodulin Acidic RNA-binding Peptide SNARP1                                                                            |
| 445 | profile 8 | 5,709491988 | AC2515 | <a href="#">DY616884</a> | <a href="#">TC108792</a> | pathogenesis related protein                                                                                               |
| 446 | profile 8 | 47,37208753 | AC2925 | <a href="#">DY617196</a> | <a href="#">TC102991</a> | calcium-binding EF-hand; adenine nucleotide translocator 1                                                                 |
| 447 | profile 8 | 3,521679737 | AC1834 | <a href="#">DY616361</a> | <a href="#">TC100830</a> | CCCH-type zinc finger transcription factor                                                                                 |
| 448 | profile 8 | 5,252752975 | AC4379 | <a href="#">DY618123</a> | <a href="#">TC97287</a>  | glutamine amidotransferase class I                                                                                         |
| 449 | profile 8 | 3,766170891 | AC0089 | <a href="#">AJ388728</a> | <a href="#">TC107091</a> | protein of the AS2 family (AS2-like or ASL) with LOB-domain class II; plant specific domain; possible transcription factor |
| 450 | profile 8 | 5,760911388 | AC1192 | <a href="#">DY615855</a> | <a href="#">TC104742</a> | homologous to uncharacterized protein containing DHHC-type Zn finger                                                       |
| 451 | profile 8 | 3,284922627 | AC2470 | <a href="#">DY616848</a> | <a href="#">TC107091</a> | protein of the AS2 family (AS2-like or ASL) with LOB-domain class II; plant specific domain; possible transcription factor |
| 452 | profile 8 | 5,367988475 | AC2778 | <a href="#">DY617090</a> | <a href="#">TC96682</a>  | protein of unknown function                                                                                                |
| 453 | profile 8 | 3,266798647 | AC0278 | <a href="#">AJ388909</a> | <a href="#">TC101043</a> | pyrophosphate-dependent phosphofructo-1-kinase (glycolysis)                                                                |
| 454 | profile 8 | 17,79612441 | AC1528 | <a href="#">DY616129</a> | <a href="#">TC94722</a>  | senescence associated protein with Rhodanese Homology Domain (RHOD)                                                        |
| 455 | profile 8 | 4,300360863 | AC0250 | <a href="#">AJ388881</a> | <a href="#">TC98666</a>  | similar to wound induced protein of unknown function                                                                       |
| 456 | profile 8 | 7,749595304 | AC3156 | <a href="#">DY617308</a> |                          | carbonic anhydrase                                                                                                         |
| 457 | profile 8 | 3,798699553 | AC2177 | <a href="#">DY616641</a> | <a href="#">TC100753</a> | NCR                                                                                                                        |
| 458 | profile 8 | 9,023422578 | AC3206 | <a href="#">DY617332</a> | <a href="#">TC95501</a>  | NCR011                                                                                                                     |
| 459 | profile 8 | 5,593949352 | AC3111 | <a href="#">DY617286</a> | <a href="#">TC100893</a> | NCR184                                                                                                                     |
| 460 | profile 8 | 58,97698078 | AC3124 | <a href="#">DY617296</a> | <a href="#">TC95184</a>  | NCR238                                                                                                                     |
| 461 | profile 8 | 5,553089688 | AC2331 | <a href="#">DY616749</a> |                          | NCR346                                                                                                                     |
| 462 | profile 8 | 5,691612401 | AC2864 | <a href="#">DY617158</a> |                          | NCR350                                                                                                                     |
| 463 | profile 8 | 2,013371834 | AC4706 | <a href="#">DY618364</a> | <a href="#">TC95558</a>  | protein of unknown function                                                                                                |
| 464 | profile 8 | 5,18853275  | AC0361 | <a href="#">AJ388986</a> | <a href="#">TC101066</a> | myosin heavy chain; Smc-domain, Chromosome segregation ATPases; Cell division and chromosome partitioning                  |
| 465 | profile 8 | 2,447511753 | AC1654 | <a href="#">DY616219</a> | <a href="#">TC106560</a> | S-adenosylmethionine synthase                                                                                              |
| 466 | profile 8 | 4,647513428 | AC2713 | <a href="#">DY617034</a> | <a href="#">TC94896</a>  | chitinase class III                                                                                                        |
| 467 | profile 8 | 7,793249745 | AC2394 | <a href="#">DY616798</a> | <a href="#">TC95833</a>  | NCR208                                                                                                                     |
| 468 | profile 8 | 2,570951774 | AC2051 | <a href="#">DY616531</a> | <a href="#">TC111920</a> | polygalacturonase PG1                                                                                                      |
| 469 | profile 8 | 4,919593974 | AC0207 | <a href="#">AJ388841</a> | <a href="#">TC95900</a>  | serine carboxypeptidase                                                                                                    |
| 470 | profile 8 | 2,111238577 | AC2180 | <a href="#">DY616643</a> | <a href="#">TC95517</a>  | secreted aspartic proteinase (senescence associated)                                                                       |
| 471 | profile 8 | 2,584561907 | AC4691 | <a href="#">DY618350</a> | <a href="#">TC96290</a>  | chitinase                                                                                                                  |

|     |           |             |        |                          |                          |                                                                                                                                       |
|-----|-----------|-------------|--------|--------------------------|--------------------------|---------------------------------------------------------------------------------------------------------------------------------------|
| 472 | profile 8 | 2,820139859 | AC4353 | <a href="#">DY618103</a> | <a href="#">TC96056</a>  | cysteine proteinase                                                                                                                   |
| 473 | profile 8 | 6,133491659 | AC0393 | <a href="#">AJ389016</a> | <a href="#">TC98625</a>  | cysteine proteinase                                                                                                                   |
| 474 | profile 8 | 6,344526295 | AC1380 | <a href="#">DY615999</a> | <a href="#">TC100440</a> | cysteine proteinase                                                                                                                   |
| 475 | profile 8 | 6,187199866 | AC1811 | <a href="#">DY616343</a> | <a href="#">TC110797</a> | class III chitinase                                                                                                                   |
| 476 | profile 8 | 1,962892604 | AC2835 | <a href="#">DY617140</a> | singleton                | POT family protein (proton-dependent oligopeptide transport); Dipeptide/tripeptide permease                                           |
| 477 | profile 8 | 3,072073733 | AC1080 | <a href="#">DY615766</a> | <a href="#">TC101701</a> | acyl-CoA oxidase; fatty acid metabolism; peroxisome                                                                                   |
| 478 | profile 8 | 2,1658412   | AC1105 | <a href="#">DY615783</a> | <a href="#">TC106745</a> | ARG10; protein of unknown function; responsive to auxin and aluminium; possible asparagine synthetase (homologous to AC3455=TC107024) |
| 479 | profile 8 | 28,1170654  | AC0037 | <a href="#">AJ388679</a> | <a href="#">TC100391</a> | asparagine synthetase                                                                                                                 |
| 480 | profile 8 | 21,2828082  | AC1367 | <a href="#">DY615990</a> | <a href="#">TC100391</a> | asparagine synthetase                                                                                                                 |
| 481 | profile 8 | 19,28409453 | AC2820 | <a href="#">DY617127</a> | <a href="#">TC100393</a> | asparagine synthetase                                                                                                                 |
| 482 | profile 8 | 6,501217985 | AC3384 | <a href="#">DY617413</a> | <a href="#">TC94631</a>  | aspartate aminotransferase                                                                                                            |
| 483 | profile 8 | 10,70328673 | AC3246 | <a href="#">DY617358</a> | singleton                | NCR023                                                                                                                                |
| 484 | profile 8 | 2,545483239 | AC2530 | <a href="#">DY616895</a> | <a href="#">TC100502</a> | cytochrome P450 [Secondary metabolites biosynthesis, transport, and catabolism]                                                       |
| 485 | profile 8 | 8,574490175 | AC1272 | <a href="#">DY615926</a> | singleton                | NCR078                                                                                                                                |
| 486 | profile 8 | 4,925427483 | AC1030 | <a href="#">DY615736</a> | singleton                | NCR314                                                                                                                                |
| 487 | profile 8 | 3,21056225  | AC0087 | <a href="#">AJ388726</a> | singleton                | NCR                                                                                                                                   |
| 488 | profile 8 | 3,971367264 | AC2079 | <a href="#">DY616553</a> | singleton                | reverse transcriptase retrotransposon (remnant); homologous to nodule specific retrotransposon TC102933                               |
| 489 | profile 8 | 4,114088694 | AC2658 | <a href="#">DY616991</a> | singleton                | RNA-directed DNA polymerase (Reverse transcriptase); homologous to nodule specific retrotransposon TC102933                           |
| 490 | profile 8 | 2,019956693 | AC2967 | <a href="#">DY617216</a> | <a href="#">TC103144</a> | oxidoreductase; secondary metabolism; senescence-associated nodulin Glycine max                                                       |
| 491 | profile 8 | 3,796237808 | AC2943 | <a href="#">DY617207</a> | <a href="#">TC94214</a>  | defensin (76aa); Gamma-thionin protease inhibitor; Knottin family; signal peptide                                                     |
| 492 | profile 8 | 2,380450481 | AC0313 | <a href="#">AJ388942</a> | <a href="#">TC95881</a>  | apyrase-like protein                                                                                                                  |
| 493 | profile 8 | 2,689942373 | AC0737 | <a href="#">DY615650</a> | <a href="#">TC106991</a> | heme oxygenase 1                                                                                                                      |
| 494 | profile 8 | 2,334750538 | AC1122 | <a href="#">DY615798</a> | <a href="#">TC107005</a> | protein of unknown function                                                                                                           |
| 495 | profile 8 | 2,563675083 | AC1363 | <a href="#">DY615987</a> | <a href="#">TC99503</a>  | conserved protein of unknown function; cupin family; suger isomerase                                                                  |
| 496 | profile 8 | 5,308759802 | AC1861 | <a href="#">DY616386</a> | singleton                | calmodulin-binding protein with IQ calmodulin-binding motif                                                                           |
| 497 | profile 8 | 2,920603539 | AC2019 | <a href="#">DY616509</a> | <a href="#">TC98799</a>  | conserved protein of unknown function; contains Smc domain for Chromosome segregation ATPases                                         |
| 498 | profile 8 | 1,684049671 | AC2065 | <a href="#">DY616540</a> | <a href="#">TC101943</a> | nucleotide kinase                                                                                                                     |
| 499 | profile 8 | 2,439532927 | AC2615 | <a href="#">DY616957</a> | <a href="#">TC107035</a> | soluble diacylglycerol acyltransferase                                                                                                |
| 500 | profile 8 | 5,258898214 | AC4317 | <a href="#">DY618071</a> | <a href="#">TC100441</a> | protein of unknown function                                                                                                           |



|     |           |             |        |                          |                          |                                                      |
|-----|-----------|-------------|--------|--------------------------|--------------------------|------------------------------------------------------|
| 501 | profile 8 | 6,892068084 | AC0332 | <a href="#">AJ388959</a> | <a href="#">TC100432</a> | enod8; suger esterase                                |
| 502 | profile 8 | 2,410560637 | AC2650 | <a href="#">DY616985</a> | <a href="#">TC95965</a>  | transcription factor; bZIP transcriptional activator |
| 503 | profile 8 | 1,870589602 | AC1033 | <a href="#">DY615738</a> | <a href="#">TC101115</a> | membrane protein of unknown function                 |
| 504 | profile 8 | 2,001388243 | AC2204 | <a href="#">DY616659</a> | <a href="#">TC108059</a> | trehalose-6-phosphate phosphatase                    |
| 505 | profile 8 | 3,662683215 | AC4150 | <a href="#">DY617936</a> | <a href="#">TC106537</a> | chalcone synthase                                    |
| 506 | profile 8 | 7,680585186 | AC3695 | <a href="#">DY617578</a> | <a href="#">TC102310</a> | NCR052                                               |
| 507 | profile 8 | 3,759492213 | AC0245 | <a href="#">AJ388876</a> | <a href="#">TC106462</a> | NCR120                                               |
| 508 | profile 8 | 5,858612917 | AC2591 | <a href="#">DY616938</a> | singleton                | NCR250                                               |
| 509 | profile 8 | 6,420140932 | AC2535 | <a href="#">DY616898</a> | singleton                | NCR328                                               |
| 510 | profile 8 | 3,315403918 | AC1050 | <a href="#">DY615751</a> | <a href="#">TC108488</a> | protein of unknown function                          |
| 511 | profile 8 | 1,866311518 | AC1056 | <a href="#">DY615755</a> | singleton                | protein of unknown function                          |
| 512 | profile 8 | 3,378925041 | AC1180 | <a href="#">DY615846</a> | singleton                | peptide/nitrate transporter                          |
| 513 | profile 8 | 1,328227547 | AC3020 | <a href="#">DY617243</a> | <a href="#">TC109073</a> | protein of unknown function                          |
| 514 | profile 8 | 2,045694304 | AC4497 | <a href="#">DY618206</a> | <a href="#">TC108560</a> | 2OG-Fe(II) oxygenase superfamily                     |
| 515 | profile 8 | 4,011599097 | AC3128 | <a href="#">DY617298</a> | <a href="#">TC96367</a>  | cellulase (glycosyl hydrolase family 5)              |
| 516 | profile 8 | 3,979227979 | AC1469 | <a href="#">DY616078</a> | singleton                | NCR318                                               |
| 517 | profile 8 | 3,856885122 | AC4485 | <a href="#">DY618198</a> | singleton                | phosphate transporter                                |
| 518 | profile 8 | 1,959747432 | AC1301 | <a href="#">DY615954</a> | <a href="#">TC104041</a> | protein of unknown function                          |
| 519 | profile 8 | 2,807641995 | AC4439 | <a href="#">DY618164</a> | <a href="#">TC103017</a> | receptor like kinase (RLK); signal transduction      |
| 520 | profile 8 | 8,100965343 | AC1481 | <a href="#">DY616088</a> | <a href="#">TC109232</a> | NCR039                                               |
