# Supplementary material for: Differentiation of Symbiotic Cells and Endosymbionts in Medicago truncatula Nodulation Are Coupled to Two Transcriptome-Switches
Source: PubMed Central journal article supplement (PMC2832008; doi:10.1371/journal.pone.0009519), 2010-03-04
Supplement: pone.0009519.s008.pdf [file pone.0009519.s008.pdf]

| clone N° | GenBank Accession        | MtGI TC N°               |
|----------|--------------------------|--------------------------|
| 0019     | <a href="#">AJ388667</a> | <a href="#">TC98930</a>  |
| 0020     | <a href="#">AJ388668</a> | <a href="#">TC106578</a> |
| 0022     | <a href="#">AJ388670</a> | <a href="#">TC107120</a> |
| 0023     | <a href="#">AJ388671</a> | <a href="#">TC93964</a>  |
| 0024     | <a href="#">AJ388672</a> | <a href="#">TC107014</a> |
| 0028     | <a href="#">AJ388673</a> | <a href="#">TC93973</a>  |
| 0029     | <a href="#">AJ388674</a> | <a href="#">TC106913</a> |
| 0031     | <a href="#">AJ388675</a> | <a href="#">TC100176</a> |
| 0032     | <a href="#">AJ388676</a> | <a href="#">TC94754</a>  |
| 0033     | <a href="#">AJ388677</a> | <a href="#">TC108508</a> |
| 0035     | <a href="#">AJ388678</a> | singleton                |
| 0037     | <a href="#">AJ388679</a> | <a href="#">TC100391</a> |
| 0038     | <a href="#">AJ388680</a> | <a href="#">TC100446</a> |
| 0039     | <a href="#">AJ388681</a> | singleton                |
| 0040     | <a href="#">AJ388682</a> | <a href="#">TC94277</a>  |
| 0041     | <a href="#">AJ388683</a> | <a href="#">TC106485</a> |
| 0042     | <a href="#">AJ388684</a> | <a href="#">TC94718</a>  |
| 0043     | <a href="#">AJ389056</a> | <a href="#">TC106354</a> |
| 0044     | <a href="#">AJ388685</a> | <a href="#">TC107101</a> |
| 0045     | <a href="#">AJ388686</a> | <a href="#">TC96826</a>  |
| 0046     | <a href="#">AJ388687</a> | <a href="#">TC94988</a>  |
| 0047     | <a href="#">AJ388688</a> | <a href="#">TC100709</a> |
| 0048     | <a href="#">AJ388689</a> | singleton                |
| 0049     | <a href="#">AJ388690</a> | <a href="#">TC107339</a> |
| 0050     | <a href="#">AJ388691</a> | <a href="#">TC106673</a> |
| 0051     | <a href="#">AJ388692</a> | <a href="#">TC93939</a>  |
| 0052     | <a href="#">AJ388693</a> | <a href="#">TC97228</a>  |
| 0053     | <a href="#">AJ388694</a> | <a href="#">TC106766</a> |
| 0054     | <a href="#">AJ388695</a> | <a href="#">TC100531</a> |
| 0055     | <a href="#">AJ388696</a> | <a href="#">TC107307</a> |
| 0056     | <a href="#">AJ388697</a> | singleton                |
| 0057     | <a href="#">AJ388698</a> | <a href="#">TC106925</a> |
| 0058     | <a href="#">AJ388699</a> | <a href="#">TC106598</a> |
| 0059     | <a href="#">AJ388700</a> | singleton                |
| 0060     | <a href="#">AJ388701</a> | <a href="#">TC100309</a> |
| 0061     | <a href="#">AJ388702</a> | <a href="#">TC94746</a>  |
| 0062     | <a href="#">AJ388703</a> | <a href="#">TC108704</a> |
| 0063     | <a href="#">AJ388704</a> | singleton                |
| 0064     | <a href="#">AJ388705</a> | singleton                |
| 0065     | <a href="#">AJ388706</a> | <a href="#">TC106580</a> |
| 0066     | <a href="#">AJ388707</a> | <a href="#">TC96363</a>  |
| 0067     | <a href="#">AJ388708</a> | <a href="#">TC112477</a> |
| 0068     | <a href="#">AJ388709</a> | <a href="#">TC106577</a> |
| 0069     | <a href="#">AJ388710</a> | <a href="#">TC106329</a> |
| 0070     | <a href="#">AJ388711</a> | <a href="#">TC94822</a>  |
| 0071     | <a href="#">AJ388712</a> | <a href="#">TC107642</a> |
| 0072     | <a href="#">AJ388713</a> | <a href="#">TC106473</a> |
| 0073     | <a href="#">AJ388714</a> | <a href="#">TC94210</a>  |
| 0074     | <a href="#">AJ388715</a> | <a href="#">TC106138</a> |
| 0076     | <a href="#">AJ388716</a> | <a href="#">TC96103</a>  |
| 0077     | <a href="#">AJ388717</a> | <a href="#">TC107346</a> |
| 0078     | <a href="#">AJ388718</a> | <a href="#">TC109584</a> |

|      |                          |                          |
|------|--------------------------|--------------------------|
| 0079 | <a href="#">AJ388719</a> | singleton                |
| 0080 | <a href="#">AJ388720</a> | <a href="#">TC100549</a> |
| 0081 | <a href="#">AJ388721</a> | <a href="#">TC100432</a> |
| 0082 | <a href="#">AJ388722</a> | <a href="#">TC106773</a> |
| 0083 | <a href="#">AJ388723</a> | <a href="#">TC104825</a> |
| 0084 | <a href="#">AJ388724</a> | <a href="#">TC103061</a> |
| 0085 | <a href="#">AJ388725</a> | <a href="#">TC93930</a>  |
| 0087 | <a href="#">AJ388726</a> | singleton                |
| 0088 | <a href="#">AJ388727</a> | singleton                |
| 0089 | <a href="#">AJ388728</a> | <a href="#">TC107091</a> |
| 0090 | <a href="#">AJ388729</a> | <a href="#">TC94386</a>  |
| 0091 | <a href="#">AJ388730</a> | <a href="#">TC95187</a>  |
| 0092 | <a href="#">AJ388731</a> | <a href="#">TC95257</a>  |
| 0093 | <a href="#">AJ388732</a> | <a href="#">TC107446</a> |
| 0094 | <a href="#">AJ388733</a> | singleton                |
| 0095 | <a href="#">AJ388734</a> | <a href="#">TC97307</a>  |
| 0096 | <a href="#">AJ388735</a> | <a href="#">TC106365</a> |
| 0097 | <a href="#">AJ388736</a> | <a href="#">TC100430</a> |
| 0098 | <a href="#">AJ388737</a> | <a href="#">TC94402</a>  |
| 0099 | <a href="#">AJ388738</a> | <a href="#">TC100443</a> |
| 0100 | <a href="#">AJ388739</a> | <a href="#">TC94397</a>  |
| 0101 | <a href="#">AJ388740</a> | <a href="#">TC94691</a>  |
| 0102 | <a href="#">AJ388741</a> | <a href="#">TC94567</a>  |
| 0103 | <a href="#">BQ079321</a> | singleton                |
| 0104 | <a href="#">AJ388743</a> | singleton                |
| 0105 | <a href="#">AJ388744</a> | <a href="#">TC100510</a> |
| 0106 | <a href="#">AJ388745</a> | <a href="#">TC107863</a> |
| 0107 | <a href="#">AJ389050</a> | <a href="#">TC106578</a> |
| 0108 | <a href="#">AJ388746</a> | <a href="#">TC106593</a> |
| 0109 | <a href="#">AJ388747</a> | <a href="#">TC96384</a>  |
| 0110 | <a href="#">AJ388748</a> | <a href="#">TC107342</a> |
| 0111 | <a href="#">AJ388749</a> | <a href="#">TC94384</a>  |
| 0112 | <a href="#">AJ388750</a> | <a href="#">TC106733</a> |
| 0113 | <a href="#">AJ389051</a> | <a href="#">TC102213</a> |
| 0114 | <a href="#">AJ388751</a> | <a href="#">TC100995</a> |
| 0115 | <a href="#">AJ388752</a> | <a href="#">TC100225</a> |
| 0116 | <a href="#">AJ388753</a> | <a href="#">TC102857</a> |
| 0117 | <a href="#">AJ388754</a> | singleton                |
| 0118 | <a href="#">AJ388755</a> | <a href="#">TC103712</a> |
| 0119 | <a href="#">AJ388756</a> | singleton                |
| 0120 | <a href="#">AJ388757</a> | <a href="#">TC95457</a>  |
| 0121 | <a href="#">AJ388758</a> | <a href="#">TC96029</a>  |
| 0122 | <a href="#">AJ388759</a> | <a href="#">TC108009</a> |
| 0123 | <a href="#">AJ388760</a> | <a href="#">TC94240</a>  |
| 0124 | <a href="#">AJ388761</a> | <a href="#">TC109385</a> |
| 0125 | <a href="#">AJ388762</a> | singleton                |
| 0126 | <a href="#">AJ388763</a> | <a href="#">TC107020</a> |
| 0128 | <a href="#">AJ388765</a> | <a href="#">TC95325</a>  |
| 0129 | <a href="#">AJ388766</a> | <a href="#">TC111984</a> |
| 0130 | <a href="#">AJ388767</a> | <a href="#">TC106592</a> |
| 0131 | <a href="#">AJ388768</a> | <a href="#">TC100150</a> |
| 0133 | <a href="#">AJ388770</a> | <a href="#">TC100865</a> |
| 0134 | <a href="#">AJ388771</a> | <a href="#">TC107872</a> |
| 0135 | <a href="#">AJ388772</a> | <a href="#">TC106563</a> |
| 0136 | <a href="#">AJ388775</a> | <a href="#">TC101916</a> |
| 0137 | <a href="#">AJ388773</a> | singleton                |

|      |                          |                          |
|------|--------------------------|--------------------------|
| 0138 | <a href="#">AJ389052</a> | <a href="#">TC94835</a>  |
| 0139 | <a href="#">AJ388776</a> | <a href="#">TC106721</a> |
| 0141 | <a href="#">AJ388778</a> | <a href="#">TC100755</a> |
| 0142 | <a href="#">AJ388779</a> | <a href="#">TC98063</a>  |
| 0143 | <a href="#">AJ388780</a> | <a href="#">TC100308</a> |
| 0144 | <a href="#">AJ388781</a> | singleton                |
| 0145 | <a href="#">AJ388782</a> | <a href="#">TC94384</a>  |
| 0146 | <a href="#">AJ388783</a> | <a href="#">TC106579</a> |
| 0147 | <a href="#">AJ388784</a> | <a href="#">TC106953</a> |
| 0148 | <a href="#">AJ388785</a> | <a href="#">TC111389</a> |
| 0149 | <a href="#">AJ388786</a> | <a href="#">TC101064</a> |
| 0150 | <a href="#">AJ388787</a> | singleton                |
| 0151 | <a href="#">AJ388788</a> | singleton                |
| 0152 | <a href="#">AJ388789</a> | <a href="#">TC95776</a>  |
| 0153 | <a href="#">AJ388790</a> | <a href="#">TC94624</a>  |
| 0154 | <a href="#">AJ388791</a> | <a href="#">TC104921</a> |
| 0155 | <a href="#">AJ388792</a> | singleton                |
| 0156 | <a href="#">AJ388793</a> | <a href="#">TC106425</a> |
| 0157 | <a href="#">AJ388794</a> | <a href="#">TC96235</a>  |
| 0159 | <a href="#">AJ388796</a> | singleton                |
| 0160 | <a href="#">AJ388797</a> | <a href="#">TC107190</a> |
| 0161 | <a href="#">AJ388798</a> | <a href="#">TC108776</a> |
| 0162 | <a href="#">AJ388799</a> | <a href="#">TC99781</a>  |
| 0163 | <a href="#">AJ388800</a> | singleton                |
| 0164 | <a href="#">AJ388801</a> | <a href="#">TC101084</a> |
| 0165 | <a href="#">AJ388802</a> | singleton                |
| 0166 | <a href="#">AJ388803</a> | singleton                |
| 0169 | <a href="#">AJ388805</a> | <a href="#">TC108507</a> |
| 0170 | <a href="#">AJ388806</a> | singleton                |
| 0171 | <a href="#">AJ388807</a> | <a href="#">TC100467</a> |
| 0172 | <a href="#">AJ388808</a> | <a href="#">TC110270</a> |
| 0173 | <a href="#">AJ388809</a> | <a href="#">TC96168</a>  |
| 0174 | <a href="#">AJ388810</a> | <a href="#">TC112393</a> |
| 0175 | <a href="#">AJ388811</a> | <a href="#">TC108034</a> |
| 0176 | <a href="#">AJ388812</a> | singleton                |
| 0177 | <a href="#">AJ388813</a> | <a href="#">TC100759</a> |
| 0178 | <a href="#">AJ388814</a> | <a href="#">TC107470</a> |
| 0179 | <a href="#">AJ388815</a> | <a href="#">TC106310</a> |
| 0180 | <a href="#">AJ388816</a> | <a href="#">TC97161</a>  |
| 0181 | <a href="#">AJ388817</a> | singleton                |
| 0182 | <a href="#">AJ388818</a> | <a href="#">TC98782</a>  |
| 0183 | <a href="#">AJ388819</a> | <a href="#">TC93977</a>  |
| 0184 | <a href="#">AJ389053</a> | singleton                |
| 0186 | <a href="#">AJ388820</a> | <a href="#">TC108449</a> |
| 0187 | <a href="#">AJ388821</a> | <a href="#">TC98767</a>  |
| 0188 | <a href="#">AJ388822</a> | <a href="#">TC101307</a> |
| 0189 | <a href="#">AJ388823</a> | <a href="#">TC97593</a>  |
| 0190 | <a href="#">AJ388824</a> | singleton                |
| 0191 | <a href="#">AJ388825</a> | <a href="#">TC103840</a> |
| 0192 | <a href="#">AJ388826</a> | <a href="#">TC94496</a>  |
| 0193 | <a href="#">AJ388827</a> | singleton                |
| 0195 | <a href="#">AJ388829</a> | <a href="#">TC106380</a> |
| 0196 | <a href="#">AJ388830</a> | <a href="#">TC106824</a> |
| 0197 | <a href="#">AJ388831</a> | singleton                |
| 0198 | <a href="#">AJ388832</a> | <a href="#">TC109316</a> |
| 0200 | <a href="#">AJ388834</a> | singleton                |

|      |                          |                          |
|------|--------------------------|--------------------------|
| 0201 | <a href="#">AJ388835</a> | <a href="#">TC94538</a>  |
| 0202 | <a href="#">AJ388836</a> | <a href="#">TC98857</a>  |
| 0203 | <a href="#">AJ388837</a> | <a href="#">TC106620</a> |
| 0204 | <a href="#">AJ388838</a> | <a href="#">TC97735</a>  |
| 0205 | <a href="#">AJ388839</a> | <a href="#">TC94720</a>  |
| 0206 | <a href="#">AJ388840</a> | <a href="#">TC102963</a> |
| 0207 | <a href="#">AJ388841</a> | <a href="#">TC95900</a>  |
| 0209 | <a href="#">AJ388843</a> | <a href="#">TC107121</a> |
| 0210 | <a href="#">AJ388844</a> | <a href="#">TC100608</a> |
| 0211 | <a href="#">AJ388845</a> | singleton                |
| 0212 | <a href="#">AJ388846</a> | <a href="#">TC100607</a> |
| 0213 | <a href="#">AJ388847</a> | <a href="#">TC107039</a> |
| 0214 | <a href="#">AJ388848</a> | <a href="#">TC110814</a> |
| 0215 | <a href="#">AJ388849</a> | <a href="#">TC106591</a> |
| 0216 | <a href="#">AJ388850</a> | <a href="#">TC107148</a> |
| 0217 | <a href="#">AJ388851</a> | <a href="#">TC110093</a> |
| 0218 | <a href="#">AJ388852</a> | singleton                |
| 0220 | <a href="#">AJ388854</a> | singleton                |
| 0221 | <a href="#">AJ388855</a> | <a href="#">TC100955</a> |
| 0222 | <a href="#">AJ388856</a> | <a href="#">TC106485</a> |
| 0224 | <a href="#">AJ388857</a> | <a href="#">TC100586</a> |
| 0226 | <a href="#">AJ388859</a> | singleton                |
| 0229 | <a href="#">AJ388861</a> | <a href="#">TC106594</a> |
| 0230 | <a href="#">AJ388862</a> | <a href="#">TC108178</a> |
| 0231 | <a href="#">AJ388863</a> | singleton                |
| 0233 | <a href="#">AJ388865</a> | <a href="#">TC93925</a>  |
| 0234 | <a href="#">AJ388866</a> | <a href="#">TC94582</a>  |
| 0236 | <a href="#">AJ388867</a> | <a href="#">TC100533</a> |
| 0237 | <a href="#">AJ388868</a> | <a href="#">TC100789</a> |
| 0238 | <a href="#">AJ388869</a> | <a href="#">TC107436</a> |
| 0239 | <a href="#">AJ388870</a> | singleton                |
| 0240 | <a href="#">AJ388871</a> | <a href="#">TC93945</a>  |
| 0241 | <a href="#">AJ388872</a> | <a href="#">TC94296</a>  |
| 0242 | <a href="#">AJ388873</a> | <a href="#">TC102095</a> |
| 0243 | <a href="#">AJ388874</a> | <a href="#">TC104099</a> |
| 0244 | <a href="#">AJ388875</a> | singleton                |
| 0245 | <a href="#">AJ388876</a> | <a href="#">TC106462</a> |
| 0246 | <a href="#">AJ388877</a> | <a href="#">TC95164</a>  |
| 0247 | <a href="#">AJ388878</a> | singleton                |
| 0249 | <a href="#">AJ388880</a> | singleton                |
| 0250 | <a href="#">AJ388881</a> | <a href="#">TC98666</a>  |
| 0251 | <a href="#">AJ388882</a> | singleton                |
| 0252 | <a href="#">AJ388883</a> | <a href="#">TC107790</a> |
| 0253 | <a href="#">AJ388884</a> | <a href="#">TC100421</a> |
| 0254 | <a href="#">AJ388885</a> | singleton                |
| 0255 | <a href="#">AJ388886</a> | <a href="#">TC111940</a> |
| 0256 | <a href="#">AJ388887</a> | <a href="#">TC107267</a> |
| 0257 | <a href="#">AJ388888</a> | <a href="#">TC100410</a> |
| 0258 | <a href="#">AJ388889</a> | <a href="#">TC110049</a> |
| 0259 | <a href="#">AJ388890</a> | singleton                |
| 0260 | <a href="#">AJ388891</a> | <a href="#">TC101296</a> |
| 0262 | <a href="#">AJ388893</a> | <a href="#">TC104756</a> |
| 0263 | <a href="#">AJ388894</a> | <a href="#">TC102899</a> |
| 0265 | <a href="#">AJ388896</a> | singleton                |
| 0266 | <a href="#">AJ388897</a> | <a href="#">TC107193</a> |
| 0267 | <a href="#">AJ388898</a> | <a href="#">TC94436</a>  |

|      |                          |                          |
|------|--------------------------|--------------------------|
| 0268 | <a href="#">AJ388899</a> | singleton                |
| 0270 | <a href="#">AJ388901</a> | <a href="#">TC96245</a>  |
| 0271 | <a href="#">AJ388902</a> | singleton                |
| 0273 | <a href="#">AJ388904</a> | singleton                |
| 0274 | <a href="#">AJ388905</a> | <a href="#">TC106899</a> |
| 0276 | <a href="#">AJ388907</a> | <a href="#">TC98590</a>  |
| 0277 | <a href="#">AJ388908</a> | <a href="#">TC103041</a> |
| 0278 | <a href="#">AJ388909</a> | <a href="#">TC101043</a> |
| 0279 | <a href="#">AJ388910</a> | <a href="#">TC94903</a>  |
| 0280 | <a href="#">AJ388911</a> | <a href="#">TC96054</a>  |
| 0281 | <a href="#">AJ388912</a> | singleton                |
| 0282 | <a href="#">AJ389054</a> | <a href="#">TC96916</a>  |
| 0283 | <a href="#">AJ388913</a> | <a href="#">TC94647</a>  |
| 0284 | <a href="#">AJ388914</a> | <a href="#">TC101000</a> |
| 0285 | <a href="#">AJ388915</a> | singleton                |
| 0286 | <a href="#">AJ388916</a> | singleton                |
| 0287 | <a href="#">AJ388917</a> | <a href="#">TC93931</a>  |
| 0288 | <a href="#">AJ388918</a> | <a href="#">TC94518</a>  |
| 0289 | <a href="#">AJ388919</a> | <a href="#">TC94581</a>  |
| 0290 | <a href="#">AJ388920</a> | <a href="#">TC106541</a> |
| 0291 | <a href="#">AJ388921</a> | <a href="#">TC107758</a> |
| 0292 | <a href="#">AJ388922</a> | <a href="#">TC95339</a>  |
| 0294 | <a href="#">AJ388924</a> | singleton                |
| 0295 | <a href="#">AJ388925</a> | <a href="#">TC93919</a>  |
| 0296 | <a href="#">AJ388926</a> | <a href="#">TC94681</a>  |
| 0299 | <a href="#">AJ388929</a> | <a href="#">TC93945</a>  |
| 0300 | <a href="#">AJ388930</a> | <a href="#">TC101898</a> |
| 0301 | <a href="#">AJ388931</a> | <a href="#">TC100213</a> |
| 0303 | <a href="#">AJ388933</a> | <a href="#">TC95563</a>  |
| 0304 | <a href="#">AJ388934</a> | <a href="#">TC107718</a> |
| 0305 | <a href="#">AJ388935</a> | <a href="#">TC101268</a> |
| 0307 | <a href="#">AJ388937</a> | singleton                |
| 0308 | <a href="#">AJ388938</a> | <a href="#">TC94446</a>  |
| 0309 | <a href="#">AJ388939</a> | <a href="#">TC94515</a>  |
| 0310 | <a href="#">AJ388940</a> | <a href="#">TC106692</a> |
| 0312 | <a href="#">AJ388941</a> | <a href="#">TC94540</a>  |
| 0313 | <a href="#">AJ388942</a> | <a href="#">TC95881</a>  |
| 0314 | <a href="#">AJ388943</a> | <a href="#">TC101797</a> |
| 0315 | <a href="#">AJ388944</a> | singleton                |
| 0316 | <a href="#">AJ388945</a> | <a href="#">TC110546</a> |
| 0317 | <a href="#">AJ388946</a> | <a href="#">TC101623</a> |
| 0319 | <a href="#">AJ388948</a> | <a href="#">TC94718</a>  |
| 0320 | <a href="#">AJ388949</a> | <a href="#">TC106716</a> |
| 0321 | <a href="#">AJ389055</a> | <a href="#">TC102185</a> |
| 0323 | <a href="#">AJ388950</a> | singleton                |
| 0324 | <a href="#">AJ388951</a> | <a href="#">TC109055</a> |
| 0325 | <a href="#">AJ388952</a> | singleton                |
| 0326 | <a href="#">AJ388953</a> | <a href="#">TC106500</a> |
| 0327 | <a href="#">AJ388954</a> | <a href="#">TC94360</a>  |
| 0329 | <a href="#">AJ388956</a> | <a href="#">TC96120</a>  |
| 0330 | <a href="#">AJ388957</a> | <a href="#">TC94053</a>  |
| 0331 | <a href="#">AJ388958</a> | <a href="#">TC106347</a> |
| 0332 | <a href="#">AJ388959</a> | <a href="#">TC94874</a>  |
| 0333 | <a href="#">AJ388960</a> | singleton                |
| 0334 | <a href="#">AJ388961</a> | <a href="#">TC107273</a> |
| 0337 | <a href="#">AJ388964</a> | <a href="#">TC94209</a>  |

|      |                          |                          |
|------|--------------------------|--------------------------|
| 0338 | <a href="#">AJ388965</a> | <a href="#">TC106866</a> |
| 0340 | <a href="#">AJ388967</a> | <a href="#">TC112150</a> |
| 0341 | <a href="#">AJ388968</a> | <a href="#">TC94268</a>  |
| 0342 | <a href="#">AJ388969</a> | <a href="#">TC94980</a>  |
| 0343 | <a href="#">AJ388970</a> | <a href="#">TC102979</a> |
| 0344 | <a href="#">AJ388971</a> | <a href="#">TC101807</a> |
| 0345 | <a href="#">AJ388972</a> | <a href="#">TC100879</a> |
| 0346 | <a href="#">AJ388973</a> | <a href="#">TC94061</a>  |
| 0347 | <a href="#">AJ388974</a> | singleton                |
| 0348 | <a href="#">AJ388975</a> | <a href="#">TC93950</a>  |
| 0349 | <a href="#">AJ388976</a> | <a href="#">TC106459</a> |
| 0350 | <a href="#">AJ388977</a> | <a href="#">TC111704</a> |
| 0352 | <a href="#">AJ388978</a> | <a href="#">TC108003</a> |
| 0353 | <a href="#">AJ388979</a> | <a href="#">TC106697</a> |
| 0356 | <a href="#">AJ388981</a> | singleton                |
| 0357 | <a href="#">AJ388982</a> | <a href="#">TC103108</a> |
| 0358 | <a href="#">AJ388983</a> | <a href="#">TC106640</a> |
| 0359 | <a href="#">AJ388984</a> | singleton                |
| 0360 | <a href="#">AJ388985</a> | <a href="#">TC109579</a> |
| 0361 | <a href="#">AJ388986</a> | <a href="#">TC101066</a> |
| 0362 | <a href="#">AJ388987</a> | <a href="#">TC99272</a>  |
| 0363 | <a href="#">AJ388988</a> | <a href="#">TC106384</a> |
| 0364 | <a href="#">AJ388989</a> | <a href="#">TC95314</a>  |
| 0365 | <a href="#">AJ388990</a> | <a href="#">TC104053</a> |
| 0366 | <a href="#">AJ388991</a> | <a href="#">TC102128</a> |
| 0367 | <a href="#">AJ388992</a> | <a href="#">TC94919</a>  |
| 0368 | <a href="#">AJ388993</a> | <a href="#">TC110787</a> |
| 0371 | <a href="#">AJ388996</a> | <a href="#">TC106667</a> |
| 0374 | <a href="#">AJ388998</a> | <a href="#">TC106741</a> |
| 0375 | <a href="#">AJ388999</a> | <a href="#">TC106743</a> |
| 0376 | <a href="#">AJ389000</a> | singleton                |
| 0377 | <a href="#">AJ389001</a> | <a href="#">TC94278</a>  |
| 0378 | <a href="#">AJ389002</a> | <a href="#">TC94131</a>  |
| 0379 | <a href="#">AJ389003</a> | <a href="#">TC110894</a> |
| 0382 | <a href="#">AJ389005</a> | <a href="#">TC94293</a>  |
| 0383 | <a href="#">AJ389006</a> | <a href="#">TC94333</a>  |
| 0384 | <a href="#">AJ389007</a> | singleton                |
| 0385 | <a href="#">AJ389008</a> | <a href="#">TC102614</a> |
| 0386 | <a href="#">AJ389009</a> | singleton                |
| 0387 | <a href="#">AJ389010</a> | <a href="#">TC94886</a>  |
| 0389 | <a href="#">AJ389012</a> | <a href="#">TC106896</a> |
| 0390 | <a href="#">AJ389013</a> | singleton                |
| 0391 | <a href="#">AJ389014</a> | <a href="#">TC108193</a> |
| 0392 | <a href="#">AJ389015</a> | <a href="#">TC101100</a> |
| 0393 | <a href="#">AJ389016</a> | <a href="#">TC98625</a>  |
| 0394 | <a href="#">AJ389017</a> | singleton                |
| 0395 | <a href="#">AJ389018</a> | <a href="#">TC100271</a> |
| 0397 | <a href="#">AJ389020</a> | <a href="#">TC99453</a>  |
| 0398 | <a href="#">AJ389021</a> | <a href="#">TC94101</a>  |
| 0399 | <a href="#">AJ389022</a> | <a href="#">TC101865</a> |
| 0400 | <a href="#">AJ389023</a> | singleton                |
| 0401 | <a href="#">AJ389024</a> | singleton                |
| 0402 | <a href="#">AJ389025</a> | <a href="#">TC108392</a> |
| 0403 | <a href="#">AJ389026</a> | <a href="#">TC106457</a> |
| 0404 | <a href="#">AJ389027</a> | <a href="#">TC107252</a> |
| 0405 | <a href="#">AJ389028</a> | <a href="#">TC108603</a> |

|      |                          |                          |
|------|--------------------------|--------------------------|
| 0406 | <a href="#">AJ389029</a> | <a href="#">TC100979</a> |
| 0407 | <a href="#">AJ389030</a> | <a href="#">TC94770</a>  |
| 0408 | <a href="#">AJ389031</a> | singleton                |
| 0409 | <a href="#">AJ389032</a> | <a href="#">TC110056</a> |
| 0410 | <a href="#">AJ389033</a> | <a href="#">TC100580</a> |
| 0411 | <a href="#">AJ389034</a> | <a href="#">TC101039</a> |
| 0412 | <a href="#">AJ389035</a> | <a href="#">TC97140</a>  |
| 0413 | <a href="#">AJ389036</a> | <a href="#">TC106312</a> |
| 0414 | <a href="#">AJ389037</a> | <a href="#">TC105276</a> |
| 0415 | <a href="#">AJ389038</a> | <a href="#">TC95565</a>  |
| 0416 | <a href="#">AJ389039</a> | <a href="#">TC100146</a> |
| 0417 | <a href="#">AJ389040</a> | <a href="#">TC107133</a> |
| 0418 | <a href="#">AJ389041</a> | <a href="#">TC100851</a> |
| 0419 | <a href="#">AJ389042</a> | <a href="#">TC109830</a> |
| 0421 | <a href="#">AJ389044</a> | <a href="#">TC106948</a> |
| 0423 | <a href="#">AJ389046</a> | <a href="#">TC101728</a> |
| 0424 | <a href="#">AJ389047</a> | <a href="#">TC98386</a>  |
| 0425 | <a href="#">AJ389048</a> | <a href="#">TC106582</a> |
| 0426 | <a href="#">AJ389049</a> | <a href="#">TC95421</a>  |
| 0501 | <a href="#">DY615432</a> | singleton                |
| 0502 | <a href="#">DY615433</a> | <a href="#">TC97828</a>  |
| 0503 | <a href="#">DY615434</a> | singleton                |
| 0505 | <a href="#">DY615436</a> | <a href="#">TC100731</a> |
| 0506 | <a href="#">DY615437</a> | <a href="#">TC101825</a> |
| 0507 | <a href="#">DY615438</a> | singleton                |
| 0508 | <a href="#">DY615439</a> | <a href="#">TC110922</a> |
| 0509 | <a href="#">DY615440</a> | <a href="#">TC108181</a> |
| 0510 | <a href="#">DY615441</a> | <a href="#">TC108327</a> |
| 0511 | <a href="#">DY615442</a> | <a href="#">TC100777</a> |
| 0512 | <a href="#">DY615443</a> | <a href="#">TC96206</a>  |
| 0513 | <a href="#">DY615444</a> | <a href="#">TC102768</a> |
| 0514 | <a href="#">DY615445</a> | <a href="#">TC101236</a> |
| 0515 | <a href="#">DY615446</a> | singleton                |
| 0516 | <a href="#">DY615447</a> | <a href="#">TC98206</a>  |
| 0517 | <a href="#">DY615448</a> | <a href="#">TC95953</a>  |
| 0518 | <a href="#">DY615449</a> | <a href="#">TC109790</a> |
| 0519 | <a href="#">DY615450</a> | singleton                |
| 0520 | <a href="#">DY615451</a> | singleton                |
| 0521 | <a href="#">DY615452</a> | <a href="#">TC109798</a> |
| 0522 | <a href="#">DY615453</a> | <a href="#">TC108015</a> |
| 0523 | <a href="#">DY615454</a> | <a href="#">TC103969</a> |
| 0524 | <a href="#">DY615455</a> | <a href="#">TC105324</a> |
| 0525 | <a href="#">DY615456</a> | <a href="#">TC101346</a> |
| 0526 | <a href="#">DY615457</a> | <a href="#">TC95560</a>  |
| 0527 | <a href="#">DY615458</a> | <a href="#">TC107324</a> |
| 0528 | <a href="#">DY615459</a> | <a href="#">TC95450</a>  |
| 0529 | <a href="#">DY615460</a> | <a href="#">TC100726</a> |
| 0531 | <a href="#">DY615461</a> | <a href="#">TC96606</a>  |
| 0532 | <a href="#">DY615462</a> | <a href="#">TC101980</a> |
| 0533 | <a href="#">DY615463</a> | <a href="#">TC102255</a> |
| 0535 | <a href="#">DY615464</a> | singleton                |
| 0536 | <a href="#">DY615465</a> | singleton                |
| 0537 | <a href="#">DY615466</a> | <a href="#">TC97253</a>  |
| 0538 | <a href="#">DY615467</a> | singleton                |
| 0540 | <a href="#">DY615469</a> | singleton                |
| 0541 | <a href="#">DY615470</a> | singleton                |

|      |                          |                          |
|------|--------------------------|--------------------------|
| 0542 | <a href="#">DY615471</a> | <a href="#">TC109231</a> |
| 0543 | <a href="#">DY615472</a> | <a href="#">TC102189</a> |
| 0544 | <a href="#">DY615473</a> | <a href="#">TC100522</a> |
| 0545 | <a href="#">DY615474</a> | <a href="#">TC100133</a> |
| 0546 | <a href="#">DY615475</a> | <a href="#">TC93918</a>  |
| 0547 | <a href="#">DY615476</a> | <a href="#">TC106633</a> |
| 0550 | <a href="#">DY615479</a> | singleton                |
| 0551 | <a href="#">DY615480</a> | singleton                |
| 0552 | <a href="#">DY615481</a> | singleton                |
| 0553 | <a href="#">DY615482</a> | singleton                |
| 0555 | <a href="#">DY615483</a> | singleton                |
| 0559 | <a href="#">DY615485</a> | singleton                |
| 0560 | <a href="#">DY615486</a> | <a href="#">TC97930</a>  |
| 0561 | <a href="#">DY615487</a> | <a href="#">TC94532</a>  |
| 0566 | <a href="#">DY615490</a> | singleton                |
| 0568 | <a href="#">DY615491</a> | singleton                |
| 0570 | <a href="#">DY615492</a> | singleton                |
| 0571 | <a href="#">DY615493</a> | <a href="#">TC111268</a> |
| 0574 | <a href="#">DY615495</a> | <a href="#">TC108738</a> |
| 0575 | <a href="#">DY615496</a> | <a href="#">TC94382</a>  |
| 0577 | <a href="#">DY615497</a> | singleton                |
| 0578 | <a href="#">DY615498</a> | <a href="#">TC101857</a> |
| 0579 | <a href="#">DY615499</a> | singleton                |
| 0580 | <a href="#">DY615500</a> | <a href="#">TC98374</a>  |
| 0581 | <a href="#">DY615501</a> | singleton                |
| 0582 | <a href="#">DY615502</a> | singleton                |
| 0583 | <a href="#">DY615503</a> | <a href="#">TC106770</a> |
| 0585 | <a href="#">DY615505</a> | <a href="#">TC107287</a> |
| 0587 | <a href="#">DY615507</a> | <a href="#">TC106613</a> |
| 0589 | <a href="#">DY615508</a> | <a href="#">TC100398</a> |
| 0592 | <a href="#">DY615510</a> | singleton                |
| 0593 | <a href="#">DY615511</a> | singleton                |
| 0594 | <a href="#">DY615512</a> | singleton                |
| 0595 | <a href="#">DY615513</a> | singleton                |
| 0596 | <a href="#">DY615514</a> | singleton                |
| 0597 | <a href="#">DY615515</a> | singleton                |
| 0598 | <a href="#">DY615516</a> | singleton                |
| 0600 | <a href="#">DY615517</a> | singleton                |
| 0601 | <a href="#">DY615518</a> | singleton                |
| 0602 | <a href="#">DY615519</a> | <a href="#">TC107729</a> |
| 0603 | <a href="#">DY615520</a> | <a href="#">TC106737</a> |
| 0604 | <a href="#">DY615521</a> | <a href="#">TC109445</a> |
| 0605 | <a href="#">DY615522</a> | <a href="#">TC94313</a>  |
| 0610 | <a href="#">DY615527</a> | <a href="#">TC107071</a> |
| 0611 | <a href="#">DY615528</a> | <a href="#">TC107232</a> |
| 0612 | <a href="#">DY615529</a> | <a href="#">TC108612</a> |
| 0613 | <a href="#">DY615530</a> | <a href="#">TC106801</a> |
| 0614 | <a href="#">DY615531</a> | <a href="#">TC101686</a> |
| 0615 | <a href="#">DY615532</a> | <a href="#">TC103209</a> |
| 0616 | <a href="#">DY615533</a> | <a href="#">TC99189</a>  |
| 0617 | <a href="#">DY615534</a> | <a href="#">TC107964</a> |
| 0618 | <a href="#">DY615535</a> | singleton                |
| 0619 | <a href="#">DY615536</a> | <a href="#">TC107397</a> |
| 0620 | <a href="#">DY615537</a> | <a href="#">TC99623</a>  |
| 0621 | <a href="#">DY615538</a> | singleton                |
| 0622 | <a href="#">DY615539</a> | singleton                |



|      |                          |                          |
|------|--------------------------|--------------------------|
| 0627 | <a href="#">DY615544</a> | <a href="#">TC100652</a> |
| 0628 | <a href="#">DY615545</a> | <a href="#">TC106787</a> |
| 0629 | <a href="#">DY615546</a> | <a href="#">TC108841</a> |
| 0630 | <a href="#">DY615547</a> | <a href="#">TC101167</a> |
| 0631 | <a href="#">DY615548</a> | <a href="#">TC107529</a> |
| 0632 | <a href="#">DY615549</a> | singleton                |
| 0634 | <a href="#">DY615551</a> | <a href="#">TC107119</a> |
| 0635 | <a href="#">DY615552</a> | <a href="#">TC103164</a> |
| 0638 | <a href="#">DY615555</a> | <a href="#">TC103399</a> |
| 0639 | <a href="#">DY615556</a> | <a href="#">TC98184</a>  |
| 0640 | <a href="#">DY615557</a> | <a href="#">TC93936</a>  |
| 0641 | <a href="#">DY615558</a> | singleton                |
| 0642 | <a href="#">DY615559</a> | <a href="#">TC94498</a>  |
| 0643 | <a href="#">DY615560</a> | <a href="#">TC101756</a> |
| 0645 | <a href="#">DY615562</a> | <a href="#">TC108130</a> |
| 0646 | <a href="#">DY615563</a> | <a href="#">TC97752</a>  |
| 0647 | <a href="#">DY615564</a> | <a href="#">TC95129</a>  |
| 0648 | <a href="#">DY615565</a> | <a href="#">TC94983</a>  |
| 0651 | <a href="#">DY615568</a> | <a href="#">TC94335</a>  |
| 0652 | <a href="#">DY615569</a> | <a href="#">TC97596</a>  |
| 0655 | <a href="#">DY615572</a> | <a href="#">TC103668</a> |
| 0661 | <a href="#">DY615577</a> | <a href="#">TC102148</a> |
| 0662 | <a href="#">DY615578</a> | <a href="#">TC94281</a>  |
| 0664 | <a href="#">DY615580</a> | singleton                |
| 0665 | <a href="#">DY615581</a> | singleton                |
| 0666 | <a href="#">DY615582</a> | singleton                |
| 0676 | <a href="#">DY615592</a> | singleton                |
| 0677 | <a href="#">DY615593</a> | singleton                |
| 0678 | <a href="#">DY615594</a> | singleton                |
| 0679 | <a href="#">DY615595</a> | <a href="#">TC102608</a> |
| 0683 | <a href="#">DY615599</a> | <a href="#">TC100555</a> |
| 0687 | <a href="#">DY615603</a> | <a href="#">TC100754</a> |
| 0691 | <a href="#">DY615607</a> | <a href="#">TC97355</a>  |
| 0694 | <a href="#">DY615610</a> | <a href="#">TC106521</a> |
| 0698 | <a href="#">DY615614</a> | <a href="#">TC109386</a> |
| 0699 | <a href="#">DY615615</a> | singleton                |
| 0700 | <a href="#">DY615616</a> | <a href="#">TC107231</a> |
| 0701 | <a href="#">DY615617</a> | <a href="#">TC102794</a> |
| 0703 | <a href="#">DY615618</a> | <a href="#">TC100267</a> |
| 0706 | <a href="#">DY615621</a> | singleton                |
| 0707 | <a href="#">DY615622</a> | singleton                |
| 0709 | <a href="#">DY615624</a> | singleton                |
| 0711 | <a href="#">DY615626</a> | <a href="#">TC100524</a> |
| 0713 | <a href="#">DY615628</a> | singleton                |
| 0715 | <a href="#">DY615630</a> | <a href="#">TC99176</a>  |
| 0716 | <a href="#">DY615631</a> | <a href="#">TC109420</a> |
| 0717 | <a href="#">DY615632</a> | singleton                |
| 0719 | <a href="#">DY615634</a> | singleton                |
| 0720 | <a href="#">DY615635</a> | <a href="#">TC96968</a>  |
| 0721 | <a href="#">DY615636</a> | <a href="#">TC108572</a> |
| 0724 | <a href="#">DY615638</a> | <a href="#">TC108661</a> |
| 0725 | <a href="#">DY615639</a> | <a href="#">TC103326</a> |
| 0726 | <a href="#">DY615640</a> | <a href="#">TC104135</a> |
| 0727 | <a href="#">DY615641</a> | <a href="#">TC94762</a>  |
| 0728 | <a href="#">DY615642</a> | <a href="#">TC94065</a>  |
| 0729 | <a href="#">DY615643</a> | <a href="#">TC106519</a> |

|      |                          |                          |
|------|--------------------------|--------------------------|
| 0731 | <a href="#">DY615644</a> | <a href="#">TC101123</a> |
| 0732 | <a href="#">DY615645</a> | <a href="#">TC106677</a> |
| 0733 | <a href="#">DY615646</a> | <a href="#">TC108679</a> |
| 0737 | <a href="#">DY615650</a> | <a href="#">TC106991</a> |
| 0738 | <a href="#">DY615651</a> | singleton                |
| 0740 | <a href="#">DY615653</a> | <a href="#">TC106922</a> |
| 0742 | <a href="#">DY615655</a> | singleton                |
| 0745 | <a href="#">DY615658</a> | singleton                |
| 0747 | <a href="#">DY615660</a> | singleton                |
| 0748 | <a href="#">DY615661</a> | <a href="#">TC95586</a>  |
| 0750 | <a href="#">DY615663</a> | <a href="#">TC106986</a> |
| 0754 | <a href="#">DY615666</a> | <a href="#">TC109594</a> |
| 0755 | <a href="#">DY615667</a> | <a href="#">TC102600</a> |
| 0756 | <a href="#">DY615668</a> | <a href="#">TC106746</a> |
| 0759 | <a href="#">DY615671</a> | <a href="#">TC95443</a>  |
| 0760 | <a href="#">DY615672</a> | <a href="#">TC102365</a> |
| 0761 | <a href="#">DY615673</a> | <a href="#">TC96004</a>  |
| 0763 | <a href="#">DY615675</a> | <a href="#">TC100786</a> |
| 0764 | <a href="#">DY615676</a> | <a href="#">TC112080</a> |
| 0768 | <a href="#">DY615680</a> | <a href="#">TC93944</a>  |
| 0769 | <a href="#">DY615681</a> | <a href="#">TC106497</a> |
| 0800 | <a href="#">DY615685</a> | singleton                |
| 0802 | <a href="#">DY615687</a> | singleton                |
| 0804 | <a href="#">DY615689</a> | <a href="#">TC108851</a> |
| 0805 | <a href="#">DY615690</a> | <a href="#">TC112013</a> |
| 0811 | <a href="#">DY615696</a> | singleton                |
| 0812 | <a href="#">DY615697</a> | singleton                |
| 0813 | <a href="#">DY615698</a> | singleton                |
| 0814 | <a href="#">DY615699</a> | <a href="#">TC100549</a> |
| 0817 | <a href="#">DY615702</a> | singleton                |
| 0818 | <a href="#">DY615703</a> | <a href="#">TC100635</a> |
| 0823 | <a href="#">DY615708</a> | singleton                |
| 0827 | <a href="#">DY615711</a> | <a href="#">TC98231</a>  |
| 0829 | <a href="#">DY615713</a> | <a href="#">TC109393</a> |
| 0830 | <a href="#">DY615714</a> | <a href="#">TC100579</a> |
| 1001 | <a href="#">DY615715</a> | <a href="#">TC106342</a> |
| 1002 | <a href="#">DY615716</a> | <a href="#">TC108339</a> |
| 1003 | <a href="#">DY615717</a> | <a href="#">TC109470</a> |
| 1004 | <a href="#">DY615718</a> | singleton                |
| 1005 | <a href="#">DY615719</a> | <a href="#">TC93929</a>  |
| 1006 | <a href="#">DY615720</a> | <a href="#">TC106631</a> |
| 1008 | <a href="#">DY615721</a> | <a href="#">TC99808</a>  |
| 1009 | <a href="#">DY615722</a> | <a href="#">TC112251</a> |
| 1010 | <a href="#">DY615723</a> | singleton                |
| 1011 | <a href="#">DY615724</a> | singleton                |
| 1012 | <a href="#">DY615725</a> | <a href="#">TC94357</a>  |
| 1013 | <a href="#">DY615726</a> | singleton                |
| 1015 | <a href="#">DY615727</a> | <a href="#">TC106518</a> |
| 1018 | <a href="#">DY615729</a> | <a href="#">TC100483</a> |
| 1022 | <a href="#">DY615731</a> | <a href="#">TC96186</a>  |
| 1023 | <a href="#">DY615732</a> | <a href="#">TC100575</a> |
| 1025 | <a href="#">DY615733</a> | <a href="#">TC107058</a> |
| 1028 | <a href="#">DY615734</a> | <a href="#">TC95507</a>  |
| 1029 | <a href="#">DY615735</a> | <a href="#">TC108463</a> |
| 1030 | <a href="#">DY615736</a> | singleton                |
| 1032 | <a href="#">DY615737</a> | <a href="#">TC106753</a> |

|      |                          |                          |
|------|--------------------------|--------------------------|
| 1033 | <a href="#">DY615738</a> | <a href="#">TC101115</a> |
| 1035 | <a href="#">DY615739</a> | <a href="#">TC106528</a> |
| 1036 | <a href="#">DY615740</a> | <a href="#">TC94329</a>  |
| 1037 | <a href="#">DY615741</a> | <a href="#">TC100515</a> |
| 1040 | <a href="#">DY615744</a> | <a href="#">TC106772</a> |
| 1042 | <a href="#">DY615745</a> | <a href="#">TC100681</a> |
| 1043 | <a href="#">DY615746</a> | <a href="#">TC109580</a> |
| 1044 | <a href="#">DY615747</a> | <a href="#">TC106919</a> |
| 1045 | <a href="#">DY615748</a> | <a href="#">TC100369</a> |
| 1050 | <a href="#">DY615751</a> | <a href="#">TC108488</a> |
| 1051 | <a href="#">DY615752</a> | <a href="#">TC95076</a>  |
| 1052 | <a href="#">DY615753</a> | <a href="#">TC106429</a> |
| 1053 | <a href="#">DY615754</a> | <a href="#">TC104290</a> |
| 1056 | <a href="#">DY615755</a> | singleton                |
| 1059 | <a href="#">DY615757</a> | <a href="#">TC101527</a> |
| 1060 | <a href="#">DY615758</a> | <a href="#">TC100708</a> |
| 1065 | <a href="#">DY615759</a> | <a href="#">TC100533</a> |
| 1067 | <a href="#">DY615761</a> | <a href="#">TC100463</a> |
| 1071 | <a href="#">DY615763</a> | <a href="#">TC106587</a> |
| 1072 | <a href="#">DY615764</a> | <a href="#">TC94961</a>  |
| 1075 | <a href="#">DY615765</a> | <a href="#">TC101544</a> |
| 1080 | <a href="#">DY615766</a> | <a href="#">TC101701</a> |
| 1083 | <a href="#">DY615767</a> | <a href="#">TC110997</a> |
| 1084 | <a href="#">DY615768</a> | <a href="#">TC100139</a> |
| 1085 | <a href="#">DY615769</a> | <a href="#">TC100778</a> |
| 1086 | <a href="#">DY615770</a> | <a href="#">TC94693</a>  |
| 1092 | <a href="#">DY615772</a> | <a href="#">TC106404</a> |
| 1093 | <a href="#">DY615773</a> | <a href="#">TC100147</a> |
| 1095 | <a href="#">DY615775</a> | <a href="#">TC102653</a> |
| 1097 | <a href="#">DY615776</a> | <a href="#">TC102378</a> |
| 1099 | <a href="#">DY615778</a> | <a href="#">TC95756</a>  |
| 1101 | <a href="#">DY615780</a> | <a href="#">TC100155</a> |
| 1103 | <a href="#">DY615782</a> | singleton                |
| 1105 | <a href="#">DY615783</a> | <a href="#">TC106745</a> |
| 1106 | <a href="#">DY615784</a> | <a href="#">TC105505</a> |
| 1107 | <a href="#">DY615785</a> | singleton                |
| 1108 | <a href="#">DY615786</a> | <a href="#">TC95643</a>  |
| 1109 | <a href="#">DY615787</a> | <a href="#">TC110467</a> |
| 1110 | <a href="#">DY615788</a> | <a href="#">TC100696</a> |
| 1113 | <a href="#">DY615790</a> | <a href="#">TC101191</a> |
| 1114 | <a href="#">DY615791</a> | <a href="#">TC94539</a>  |
| 1115 | <a href="#">DY615792</a> | <a href="#">TC106434</a> |
| 1116 | <a href="#">DY615793</a> | singleton                |
| 1118 | <a href="#">DY615795</a> | <a href="#">TC101372</a> |
| 1121 | <a href="#">DY615797</a> | <a href="#">TC103583</a> |
| 1122 | <a href="#">DY615798</a> | <a href="#">TC107005</a> |
| 1123 | <a href="#">DY615799</a> | <a href="#">TC111767</a> |
| 1125 | <a href="#">DY615800</a> | <a href="#">TC94982</a>  |
| 1126 | <a href="#">DY615801</a> | singleton                |
| 1127 | <a href="#">DY615802</a> | <a href="#">TC97726</a>  |
| 1128 | <a href="#">DY615803</a> | singleton                |
| 1129 | <a href="#">DY615804</a> | <a href="#">TC102042</a> |
| 1132 | <a href="#">DY615806</a> | <a href="#">TC100814</a> |
| 1133 | <a href="#">DY615807</a> | <a href="#">TC94897</a>  |
| 1134 | <a href="#">DY615808</a> | <a href="#">TC106645</a> |
| 1135 | <a href="#">DY615809</a> | <a href="#">TC94940</a>  |

|      |                          |                          |
|------|--------------------------|--------------------------|
| 1138 | <a href="#">DY615811</a> | <a href="#">TC100604</a> |
| 1140 | <a href="#">DY615813</a> | singleton                |
| 1141 | <a href="#">DY615814</a> | <a href="#">TC94364</a>  |
| 1143 | <a href="#">DY615815</a> | singleton                |
| 1144 | <a href="#">DY615816</a> | <a href="#">TC107786</a> |
| 1145 | <a href="#">DY615817</a> | <a href="#">TC103042</a> |
| 1147 | <a href="#">DY615818</a> | <a href="#">TC106512</a> |
| 1150 | <a href="#">DY615820</a> | singleton                |
| 1151 | <a href="#">DY615821</a> | <a href="#">TC97327</a>  |
| 1153 | <a href="#">DY615822</a> | <a href="#">TC106494</a> |
| 1154 | <a href="#">DY615823</a> | <a href="#">TC101209</a> |
| 1155 | <a href="#">DY615824</a> | <a href="#">TC93927</a>  |
| 1158 | <a href="#">DY615826</a> | <a href="#">TC95195</a>  |
| 1159 | <a href="#">DY615827</a> | <a href="#">TC107600</a> |
| 1161 | <a href="#">DY615828</a> | singleton                |
| 1163 | <a href="#">DY615829</a> | <a href="#">TC93952</a>  |
| 1164 | <a href="#">DY615830</a> | <a href="#">TC101653</a> |
| 1165 | <a href="#">DY615831</a> | <a href="#">TC100650</a> |
| 1166 | <a href="#">DY615832</a> | <a href="#">TC100976</a> |
| 1167 | <a href="#">DY615833</a> | <a href="#">TC108160</a> |
| 1168 | <a href="#">DY615834</a> | <a href="#">TC109642</a> |
| 1169 | <a href="#">DY615835</a> | <a href="#">TC106627</a> |
| 1170 | <a href="#">DY615836</a> | <a href="#">TC94135</a>  |
| 1171 | <a href="#">DY615837</a> | <a href="#">TC100692</a> |
| 1172 | <a href="#">DY615838</a> | <a href="#">TC95472</a>  |
| 1173 | <a href="#">DY615839</a> | singleton                |
| 1174 | <a href="#">DY615840</a> | <a href="#">TC100478</a> |
| 1175 | <a href="#">DY615841</a> | <a href="#">TC100137</a> |
| 1176 | <a href="#">DY615842</a> | <a href="#">TC107712</a> |
| 1177 | <a href="#">DY615843</a> | <a href="#">TC106995</a> |
| 1178 | <a href="#">DY615844</a> | <a href="#">TC104784</a> |
| 1179 | <a href="#">DY615845</a> | singleton                |
| 1180 | <a href="#">DY615846</a> | singleton                |
| 1181 | <a href="#">DY615847</a> | singleton                |
| 1182 | <a href="#">DY615848</a> | <a href="#">TC99419</a>  |
| 1184 | <a href="#">DY615849</a> | <a href="#">TC96252</a>  |
| 1185 | <a href="#">DY615850</a> | <a href="#">TC94780</a>  |
| 1187 | <a href="#">DY615851</a> | <a href="#">TC106751</a> |
| 1188 | <a href="#">DY615852</a> | <a href="#">TC95427</a>  |
| 1189 | <a href="#">DY615853</a> | singleton                |
| 1191 | <a href="#">DY615854</a> | <a href="#">TC108403</a> |
| 1192 | <a href="#">DY615855</a> | <a href="#">TC104742</a> |
| 1193 | <a href="#">DY615856</a> | <a href="#">TC100168</a> |
| 1195 | <a href="#">DY615857</a> | singleton                |
| 1196 | <a href="#">DY615858</a> | singleton                |
| 1198 | <a href="#">DY615859</a> | <a href="#">TC100276</a> |
| 1199 | <a href="#">DY615860</a> | <a href="#">TC101253</a> |
| 1200 | <a href="#">DY615861</a> | <a href="#">TC108755</a> |
| 1202 | <a href="#">DY615862</a> | <a href="#">TC94347</a>  |
| 1204 | <a href="#">DY615864</a> | singleton                |
| 1205 | <a href="#">DY615865</a> | singleton                |
| 1207 | <a href="#">DY615867</a> | <a href="#">TC95172</a>  |
| 1208 | <a href="#">DY615868</a> | <a href="#">TC110704</a> |
| 1210 | <a href="#">DY615870</a> | <a href="#">TC95180</a>  |
| 1212 | <a href="#">DY615872</a> | singleton                |
| 1213 | <a href="#">DY615873</a> | <a href="#">TC96083</a>  |

|      |                          |                          |
|------|--------------------------|--------------------------|
| 1215 | <a href="#">DY615874</a> | <a href="#">TC95129</a>  |
| 1216 | <a href="#">DY615875</a> | <a href="#">TC102656</a> |
| 1218 | <a href="#">DY615877</a> | <a href="#">TC106831</a> |
| 1219 | <a href="#">DY615878</a> | singleton                |
| 1220 | <a href="#">DY615879</a> | <a href="#">TC111259</a> |
| 1223 | <a href="#">DY615882</a> | <a href="#">TC106826</a> |
| 1224 | <a href="#">DY615883</a> | <a href="#">TC100943</a> |
| 1226 | <a href="#">DY615885</a> | <a href="#">TC94621</a>  |
| 1227 | <a href="#">DY615886</a> | <a href="#">TC107530</a> |
| 1228 | <a href="#">DY615887</a> | <a href="#">TC95930</a>  |
| 1229 | <a href="#">DY615888</a> | <a href="#">TC107521</a> |
| 1232 | <a href="#">DY615889</a> | <a href="#">TC96933</a>  |
| 1233 | <a href="#">DY615890</a> | <a href="#">TC107746</a> |
| 1234 | <a href="#">DY615891</a> | singleton                |
| 1236 | <a href="#">DY615893</a> | <a href="#">TC103178</a> |
| 1239 | <a href="#">DY615894</a> | <a href="#">TC100310</a> |
| 1240 | <a href="#">DY615895</a> | <a href="#">TC100178</a> |
| 1241 | <a href="#">DY615896</a> | <a href="#">TC107567</a> |
| 1242 | <a href="#">DY615897</a> | singleton                |
| 1243 | <a href="#">DY615898</a> | singleton                |
| 1244 | <a href="#">DY615899</a> | <a href="#">TC94452</a>  |
| 1245 | <a href="#">DY615900</a> | <a href="#">TC106440</a> |
| 1248 | <a href="#">DY615903</a> | <a href="#">TC108608</a> |
| 1250 | <a href="#">DY615905</a> | <a href="#">TC100233</a> |
| 1251 | <a href="#">DY615906</a> | <a href="#">TC108979</a> |
| 1253 | <a href="#">DY615907</a> | <a href="#">TC101763</a> |
| 1254 | <a href="#">DY615908</a> | singleton                |
| 1255 | <a href="#">DY615909</a> | <a href="#">TC101113</a> |
| 1256 | <a href="#">DY615910</a> | <a href="#">TC94956</a>  |
| 1258 | <a href="#">DY615912</a> | <a href="#">TC106105</a> |
| 1260 | <a href="#">DY615914</a> | <a href="#">TC109792</a> |
| 1261 | <a href="#">DY615915</a> | <a href="#">TC100411</a> |
| 1262 | <a href="#">DY615916</a> | <a href="#">TC108269</a> |
| 1263 | <a href="#">DY615917</a> | <a href="#">TC100136</a> |
| 1264 | <a href="#">DY615918</a> | singleton                |
| 1265 | <a href="#">DY615919</a> | <a href="#">TC108606</a> |
| 1266 | <a href="#">DY615920</a> | <a href="#">TC94275</a>  |
| 1267 | <a href="#">DY615921</a> | <a href="#">TC106698</a> |
| 1269 | <a href="#">DY615923</a> | <a href="#">TC106650</a> |
| 1270 | <a href="#">DY615924</a> | <a href="#">TC109457</a> |
| 1271 | <a href="#">DY615925</a> | <a href="#">TC107444</a> |
| 1272 | <a href="#">DY615926</a> | singleton                |
| 1273 | <a href="#">DY615927</a> | <a href="#">TC108373</a> |
| 1274 | <a href="#">DY615928</a> | <a href="#">TC107117</a> |
| 1276 | <a href="#">DY615930</a> | <a href="#">TC107772</a> |
| 1277 | <a href="#">DY615931</a> | <a href="#">TC97495</a>  |
| 1278 | <a href="#">DY615932</a> | <a href="#">TC95087</a>  |
| 1279 | <a href="#">DY615933</a> | <a href="#">TC107583</a> |
| 1282 | <a href="#">DY615935</a> | <a href="#">TC103726</a> |
| 1284 | <a href="#">DY615937</a> | <a href="#">TC107268</a> |
| 1285 | <a href="#">DY615938</a> | <a href="#">TC100606</a> |
| 1287 | <a href="#">DY615940</a> | singleton                |
| 1288 | <a href="#">DY615941</a> | <a href="#">TC94406</a>  |
| 1289 | <a href="#">DY615942</a> | singleton                |
| 1290 | <a href="#">DY615943</a> | singleton                |
| 1291 | <a href="#">DY615944</a> | singleton                |

|      |                          |                          |
|------|--------------------------|--------------------------|
| 1292 | <a href="#">DY615945</a> | <a href="#">TC109935</a> |
| 1293 | <a href="#">DY615946</a> | <a href="#">TC95250</a>  |
| 1294 | <a href="#">DY615947</a> | <a href="#">TC94793</a>  |
| 1295 | <a href="#">DY615948</a> | <a href="#">TC94064</a>  |
| 1296 | <a href="#">DY615949</a> | <a href="#">TC100834</a> |
| 1297 | <a href="#">DY615950</a> | <a href="#">TC108792</a> |
| 1298 | <a href="#">DY615951</a> | singleton                |
| 1300 | <a href="#">DY615953</a> | <a href="#">TC106715</a> |
| 1301 | <a href="#">DY615954</a> | <a href="#">TC104041</a> |
| 1304 | <a href="#">DY615956</a> | <a href="#">TC94304</a>  |
| 1305 | <a href="#">DY615957</a> | <a href="#">TC106747</a> |
| 1308 | <a href="#">DY615959</a> | <a href="#">TC107182</a> |
| 1316 | <a href="#">DY615961</a> | <a href="#">TC95321</a>  |
| 1319 | <a href="#">DY615962</a> | <a href="#">TC107322</a> |
| 1322 | <a href="#">DY615963</a> | singleton                |
| 1324 | <a href="#">DY615965</a> | <a href="#">TC94425</a>  |
| 1325 | <a href="#">DY615966</a> | singleton                |
| 1326 | <a href="#">DY615967</a> | <a href="#">TC97494</a>  |
| 1327 | <a href="#">DY615968</a> | <a href="#">TC100541</a> |
| 1329 | <a href="#">DY615970</a> | <a href="#">TC106644</a> |
| 1332 | <a href="#">DY615972</a> | singleton                |
| 1333 | <a href="#">DY615973</a> | <a href="#">TC101558</a> |
| 1340 | <a href="#">DY615974</a> | <a href="#">TC108905</a> |
| 1341 | <a href="#">DY615975</a> | <a href="#">TC106516</a> |
| 1342 | <a href="#">DY615976</a> | <a href="#">TC93948</a>  |
| 1343 | <a href="#">DY615977</a> | <a href="#">TC100807</a> |
| 1352 | <a href="#">DY615979</a> | singleton                |
| 1354 | <a href="#">DY615980</a> | <a href="#">TC111083</a> |
| 1357 | <a href="#">DY615982</a> | <a href="#">TC107669</a> |
| 1358 | <a href="#">DY615983</a> | <a href="#">TC111751</a> |
| 1360 | <a href="#">DY615985</a> | <a href="#">TC95551</a>  |
| 1362 | <a href="#">DY615986</a> | <a href="#">TC95054</a>  |
| 1363 | <a href="#">DY615987</a> | <a href="#">TC99503</a>  |
| 1365 | <a href="#">DY615988</a> | <a href="#">TC106941</a> |
| 1366 | <a href="#">DY615989</a> | <a href="#">TC93959</a>  |
| 1367 | <a href="#">DY615990</a> | <a href="#">TC100391</a> |
| 1368 | <a href="#">DY615991</a> | <a href="#">TC94789</a>  |
| 1371 | <a href="#">DY615994</a> | <a href="#">TC101347</a> |
| 1372 | <a href="#">DY615995</a> | <a href="#">TC109033</a> |
| 1373 | <a href="#">DY615996</a> | singleton                |
| 1377 | <a href="#">DY615997</a> | <a href="#">TC96231</a>  |
| 1379 | <a href="#">DY615998</a> | <a href="#">TC106595</a> |
| 1380 | <a href="#">DY615999</a> | <a href="#">TC100440</a> |
| 1381 | <a href="#">DY616000</a> | singleton                |
| 1383 | <a href="#">DY616001</a> | <a href="#">TC98647</a>  |
| 1384 | <a href="#">DY616002</a> | singleton                |
| 1385 | <a href="#">DY616003</a> | <a href="#">TC100148</a> |
| 1387 | <a href="#">DY616004</a> | <a href="#">TC96166</a>  |
| 1390 | <a href="#">DY616006</a> | singleton                |
| 1391 | <a href="#">DY616007</a> | singleton                |
| 1392 | <a href="#">DY616008</a> | <a href="#">TC100610</a> |
| 1393 | <a href="#">DY616009</a> | <a href="#">TC106618</a> |
| 1394 | <a href="#">DY616010</a> | <a href="#">TC94935</a>  |
| 1395 | <a href="#">DY616011</a> | singleton                |
| 1396 | <a href="#">DY616012</a> | <a href="#">TC94672</a>  |
| 1398 | <a href="#">DY616013</a> | <a href="#">TC94680</a>  |

|      |                          |                          |
|------|--------------------------|--------------------------|
| 1399 | <a href="#">DY616014</a> | singleton                |
| 1401 | <a href="#">DY616016</a> | singleton                |
| 1402 | <a href="#">DY616017</a> | <a href="#">TC109480</a> |
| 1404 | <a href="#">DY616019</a> | <a href="#">TC106799</a> |
| 1405 | <a href="#">DY616020</a> | <a href="#">TC101284</a> |
| 1409 | <a href="#">DY616022</a> | <a href="#">TC100159</a> |
| 1410 | <a href="#">DY616023</a> | <a href="#">TC107514</a> |
| 1411 | <a href="#">DY616024</a> | <a href="#">TC94398</a>  |
| 1412 | <a href="#">DY616025</a> | singleton                |
| 1413 | <a href="#">DY616026</a> | <a href="#">TC106362</a> |
| 1414 | <a href="#">DY616027</a> | <a href="#">TC106536</a> |
| 1416 | <a href="#">DY616029</a> | <a href="#">TC106336</a> |
| 1418 | <a href="#">DY616030</a> | singleton                |
| 1419 | <a href="#">DY616031</a> | <a href="#">TC94190</a>  |
| 1420 | <a href="#">DY616032</a> | singleton                |
| 1421 | <a href="#">DY616033</a> | <a href="#">TC106485</a> |
| 1422 | <a href="#">DY616034</a> | singleton                |
| 1424 | <a href="#">DY616036</a> | singleton                |
| 1425 | <a href="#">DY616037</a> | <a href="#">TC108312</a> |
| 1426 | <a href="#">DY616038</a> | <a href="#">TC100402</a> |
| 1428 | <a href="#">DY616039</a> | <a href="#">TC94398</a>  |
| 1429 | <a href="#">DY616040</a> | singleton                |
| 1430 | <a href="#">DY616041</a> | <a href="#">TC106929</a> |
| 1431 | <a href="#">DY616042</a> | <a href="#">TC100990</a> |
| 1432 | <a href="#">DY616043</a> | singleton                |
| 1434 | <a href="#">DY616045</a> | <a href="#">TC106399</a> |
| 1435 | <a href="#">DY616046</a> | <a href="#">TC100767</a> |
| 1436 | <a href="#">DY616047</a> | <a href="#">TC97207</a>  |
| 1437 | <a href="#">DY616048</a> | <a href="#">TC103632</a> |
| 1438 | <a href="#">DY616049</a> | <a href="#">TC103276</a> |
| 1439 | <a href="#">DY616050</a> | singleton                |
| 1440 | <a href="#">DY616051</a> | <a href="#">TC100212</a> |
| 1441 | <a href="#">DY616052</a> | <a href="#">TC94614</a>  |
| 1444 | <a href="#">DY616055</a> | <a href="#">TC95391</a>  |
| 1446 | <a href="#">DY616057</a> | <a href="#">TC100761</a> |
| 1447 | <a href="#">DY616058</a> | <a href="#">TC100557</a> |
| 1448 | <a href="#">DY616059</a> | <a href="#">TC106328</a> |
| 1449 | <a href="#">DY616060</a> | singleton                |
| 1451 | <a href="#">DY616062</a> | singleton                |
| 1452 | <a href="#">DY616063</a> | singleton                |
| 1453 | <a href="#">DY616064</a> | <a href="#">TC108149</a> |
| 1454 | <a href="#">DY616065</a> | singleton                |
| 1455 | <a href="#">DY616066</a> | singleton                |
| 1456 | <a href="#">DY616067</a> | <a href="#">TC97086</a>  |
| 1460 | <a href="#">DY616070</a> | <a href="#">TC106720</a> |
| 1461 | <a href="#">DY616071</a> | <a href="#">TC94230</a>  |
| 1464 | <a href="#">DY616074</a> | singleton                |
| 1466 | <a href="#">DY616075</a> | singleton                |
| 1467 | <a href="#">DY616076</a> | <a href="#">TC101141</a> |
| 1468 | <a href="#">DY616077</a> | <a href="#">TC100383</a> |
| 1469 | <a href="#">DY616078</a> | singleton                |
| 1472 | <a href="#">DY616080</a> | <a href="#">TC100719</a> |
| 1474 | <a href="#">DY616082</a> | <a href="#">TC94015</a>  |
| 1475 | <a href="#">DY616083</a> | <a href="#">TC107277</a> |
| 1476 | <a href="#">DY616084</a> | singleton                |
| 1477 | <a href="#">DY616085</a> | singleton                |

|      |                          |                          |
|------|--------------------------|--------------------------|
| 1479 | <a href="#">DY616086</a> | <a href="#">TC101826</a> |
| 1481 | <a href="#">DY616088</a> | <a href="#">TC100270</a> |
| 1482 | <a href="#">DY616089</a> | <a href="#">TC96982</a>  |
| 1483 | <a href="#">DY616090</a> | singleton                |
| 1484 | <a href="#">DY616091</a> | <a href="#">TC95493</a>  |
| 1489 | <a href="#">DY616094</a> | <a href="#">TC94921</a>  |
| 1490 | <a href="#">DY616095</a> | <a href="#">TC94876</a>  |
| 1491 | <a href="#">DY616096</a> | <a href="#">TC107045</a> |
| 1492 | <a href="#">DY616097</a> | <a href="#">TC107828</a> |
| 1493 | <a href="#">DY616098</a> | <a href="#">TC100222</a> |
| 1494 | <a href="#">DY616099</a> | <a href="#">TC100408</a> |
| 1495 | <a href="#">DY616100</a> | singleton                |
| 1497 | <a href="#">DY616102</a> | <a href="#">TC95961</a>  |
| 1498 | <a href="#">DY616103</a> | <a href="#">TC100151</a> |
| 1499 | <a href="#">DY616104</a> | singleton                |
| 1500 | <a href="#">DY616105</a> | <a href="#">TC101307</a> |
| 1501 | <a href="#">DY616106</a> | singleton                |
| 1502 | <a href="#">DY616107</a> | <a href="#">TC95912</a>  |
| 1503 | <a href="#">DY616108</a> | singleton                |
| 1505 | <a href="#">DY616109</a> | <a href="#">TC94867</a>  |
| 1506 | <a href="#">DY616110</a> | <a href="#">TC109433</a> |
| 1509 | <a href="#">DY616113</a> | <a href="#">TC107441</a> |
| 1511 | <a href="#">DY616114</a> | <a href="#">TC110419</a> |
| 1514 | <a href="#">DY616117</a> | <a href="#">TC98461</a>  |
| 1516 | <a href="#">DY616119</a> | <a href="#">TC96791</a>  |
| 1517 | <a href="#">DY616120</a> | <a href="#">TC100427</a> |
| 1518 | <a href="#">DY616121</a> | <a href="#">TC93989</a>  |
| 1519 | <a href="#">DY616122</a> | <a href="#">TC107830</a> |
| 1521 | <a href="#">DY616123</a> | <a href="#">TC100410</a> |
| 1522 | <a href="#">DY616124</a> | <a href="#">TC93993</a>  |
| 1526 | <a href="#">DY616127</a> | <a href="#">TC100868</a> |
| 1528 | <a href="#">DY616129</a> | <a href="#">TC94722</a>  |
| 1529 | <a href="#">DY616130</a> | <a href="#">TC107406</a> |
| 1530 | <a href="#">DY616131</a> | <a href="#">TC100802</a> |
| 1531 | <a href="#">DY616132</a> | singleton                |
| 1532 | <a href="#">DY616133</a> | <a href="#">TC108128</a> |
| 1533 | <a href="#">DY616134</a> | <a href="#">TC106408</a> |
| 1534 | <a href="#">DY616135</a> | <a href="#">TC107340</a> |
| 1535 | <a href="#">DY616136</a> | singleton                |
| 1536 | <a href="#">DY616137</a> | <a href="#">TC108346</a> |
| 1538 | <a href="#">DY616138</a> | <a href="#">TC96468</a>  |
| 1540 | <a href="#">DY616139</a> | <a href="#">TC101252</a> |
| 1541 | <a href="#">DY616140</a> | <a href="#">TC106316</a> |
| 1542 | <a href="#">DY616141</a> | <a href="#">TC106474</a> |
| 1544 | <a href="#">DY616143</a> | singleton                |
| 1547 | <a href="#">DY616145</a> | <a href="#">TC100178</a> |
| 1548 | <a href="#">DY616146</a> | singleton                |
| 1549 | <a href="#">DY616147</a> | <a href="#">TC106342</a> |
| 1550 | <a href="#">DY616148</a> | <a href="#">TC100647</a> |
| 1552 | <a href="#">DY616150</a> | <a href="#">TC99490</a>  |
| 1555 | <a href="#">DY616152</a> | <a href="#">TC109169</a> |
| 1558 | <a href="#">DY616154</a> | <a href="#">TC93991</a>  |
| 1560 | <a href="#">DY616156</a> | <a href="#">TC100746</a> |
| 1561 | <a href="#">DY616157</a> | singleton                |
| 1562 | <a href="#">DY616158</a> | <a href="#">TC94661</a>  |
| 1563 | <a href="#">DY616159</a> | singleton                |



|      |                          |                          |
|------|--------------------------|--------------------------|
| 1565 | <a href="#">DY616161</a> | <a href="#">TC100742</a> |
| 1567 | <a href="#">DY616162</a> | <a href="#">TC108604</a> |
| 1568 | <a href="#">DY616163</a> | singleton                |
| 1573 | <a href="#">DY616167</a> | <a href="#">TC95706</a>  |
| 1574 | <a href="#">DY616168</a> | <a href="#">TC102356</a> |
| 1575 | <a href="#">DY616169</a> | <a href="#">TC100854</a> |
| 1576 | <a href="#">DY616170</a> | <a href="#">TC95086</a>  |
| 1577 | <a href="#">DY616171</a> | <a href="#">TC93977</a>  |
| 1578 | <a href="#">DY616172</a> | singleton                |
| 1579 | <a href="#">DY616173</a> | singleton                |
| 1581 | <a href="#">DY616175</a> | <a href="#">TC103292</a> |
| 1587 | <a href="#">DY616178</a> | <a href="#">TC94104</a>  |
| 1588 | <a href="#">DY616179</a> | singleton                |
| 1589 | <a href="#">DY616180</a> | <a href="#">TC107188</a> |
| 1591 | <a href="#">DY616181</a> | <a href="#">TC100208</a> |
| 1595 | <a href="#">DY616182</a> | <a href="#">TC102302</a> |
| 1596 | <a href="#">DY616183</a> | <a href="#">TC98572</a>  |
| 1599 | <a href="#">DY616184</a> | singleton                |
| 1600 | <a href="#">DY616185</a> | <a href="#">TC101118</a> |
| 1604 | <a href="#">DY616187</a> | <a href="#">TC109373</a> |
| 1608 | <a href="#">DY616189</a> | <a href="#">TC96169</a>  |
| 1609 | <a href="#">DY616190</a> | <a href="#">TC95169</a>  |
| 1612 | <a href="#">DY616191</a> | <a href="#">TC107365</a> |
| 1613 | <a href="#">DY616192</a> | <a href="#">TC95887</a>  |
| 1623 | <a href="#">DY616199</a> | <a href="#">TC101219</a> |
| 1626 | <a href="#">DY616201</a> | <a href="#">TC101824</a> |
| 1627 | <a href="#">DY616202</a> | <a href="#">TC108345</a> |
| 1629 | <a href="#">DY616203</a> | singleton                |
| 1630 | <a href="#">DY616204</a> | singleton                |
| 1633 | <a href="#">DY616205</a> | <a href="#">TC93947</a>  |
| 1634 | <a href="#">DY616206</a> | <a href="#">TC105954</a> |
| 1635 | <a href="#">DY616207</a> | <a href="#">TC104158</a> |
| 1638 | <a href="#">DY616208</a> | singleton                |
| 1641 | <a href="#">DY616209</a> | <a href="#">TC106965</a> |
| 1643 | <a href="#">DY616210</a> | <a href="#">TC107809</a> |
| 1645 | <a href="#">DY616211</a> | singleton                |
| 1647 | <a href="#">DY616212</a> | <a href="#">TC97772</a>  |
| 1648 | <a href="#">DY616213</a> | singleton                |
| 1650 | <a href="#">DY616215</a> | <a href="#">TC102472</a> |
| 1651 | <a href="#">DY616216</a> | singleton                |
| 1652 | <a href="#">DY616217</a> | <a href="#">TC103873</a> |
| 1653 | <a href="#">DY616218</a> | singleton                |
| 1654 | <a href="#">DY616219</a> | <a href="#">TC106560</a> |
| 1655 | <a href="#">DY616220</a> | <a href="#">TC100446</a> |
| 1656 | <a href="#">DY616221</a> | <a href="#">TC95298</a>  |
| 1658 | <a href="#">DY616222</a> | <a href="#">TC108598</a> |
| 1662 | <a href="#">DY616224</a> | <a href="#">TC95109</a>  |
| 1665 | <a href="#">DY616226</a> | singleton                |
| 1668 | <a href="#">DY616229</a> | <a href="#">TC101355</a> |
| 1670 | <a href="#">DY616230</a> | singleton                |
| 1671 | <a href="#">DY616231</a> | singleton                |
| 1672 | <a href="#">DY616232</a> | <a href="#">TC107129</a> |
| 1674 | <a href="#">DY616233</a> | <a href="#">TC96091</a>  |
| 1675 | <a href="#">DY616234</a> | <a href="#">TC107228</a> |
| 1676 | <a href="#">DY616235</a> | <a href="#">TC96179</a>  |
| 1678 | <a href="#">DY616236</a> | <a href="#">TC94645</a>  |

|      |                          |                          |
|------|--------------------------|--------------------------|
| 1683 | <a href="#">DY616239</a> | singleton                |
| 1684 | <a href="#">DY616240</a> | <a href="#">TC107656</a> |
| 1685 | <a href="#">DY616241</a> | <a href="#">TC108779</a> |
| 1686 | <a href="#">DY616242</a> | singleton                |
| 1687 | <a href="#">DY616243</a> | <a href="#">TC101298</a> |
| 1688 | <a href="#">DY616244</a> | <a href="#">TC106719</a> |
| 1691 | <a href="#">DY616245</a> | singleton                |
| 1692 | <a href="#">DY616246</a> | singleton                |
| 1695 | <a href="#">DY616249</a> | <a href="#">TC100671</a> |
| 1698 | <a href="#">DY616250</a> | <a href="#">TC94096</a>  |
| 1699 | <a href="#">DY616251</a> | <a href="#">TC108011</a> |
| 1700 | <a href="#">DY616252</a> | <a href="#">TC100779</a> |
| 1701 | <a href="#">DY616253</a> | <a href="#">TC96544</a>  |
| 1702 | <a href="#">DY616254</a> | <a href="#">TC107031</a> |
| 1704 | <a href="#">DY616256</a> | <a href="#">TC107769</a> |
| 1714 | <a href="#">DY616260</a> | <a href="#">TC100540</a> |
| 1715 | <a href="#">DY616261</a> | <a href="#">TC102115</a> |
| 1717 | <a href="#">DY616262</a> | singleton                |
| 1719 | <a href="#">DY616263</a> | <a href="#">TC101218</a> |
| 1720 | <a href="#">DY616264</a> | singleton                |
| 1721 | <a href="#">DY616265</a> | <a href="#">TC95535</a>  |
| 1722 | <a href="#">DY616266</a> | singleton                |
| 1723 | <a href="#">DY616267</a> | singleton                |
| 1725 | <a href="#">DY616268</a> | <a href="#">TC101029</a> |
| 1726 | <a href="#">DY616269</a> | <a href="#">TC98404</a>  |
| 1728 | <a href="#">DY616270</a> | <a href="#">TC108081</a> |
| 1729 | <a href="#">DY616271</a> | <a href="#">TC106311</a> |
| 1730 | <a href="#">DY616272</a> | <a href="#">TC100668</a> |
| 1731 | <a href="#">DY616273</a> | singleton                |
| 1733 | <a href="#">DY616275</a> | <a href="#">TC107908</a> |
| 1734 | <a href="#">DY616276</a> | <a href="#">TC94517</a>  |
| 1738 | <a href="#">DY616279</a> | <a href="#">TC94058</a>  |
| 1739 | <a href="#">DY616280</a> | <a href="#">TC103815</a> |
| 1740 | <a href="#">DY616281</a> | singleton                |
| 1741 | <a href="#">DY616282</a> | <a href="#">TC101289</a> |
| 1744 | <a href="#">DY616283</a> | <a href="#">TC94252</a>  |
| 1746 | <a href="#">DY616284</a> | <a href="#">TC106523</a> |
| 1748 | <a href="#">DY616285</a> | <a href="#">TC94348</a>  |
| 1761 | <a href="#">DY616297</a> | <a href="#">TC99440</a>  |
| 1764 | <a href="#">DY616300</a> | <a href="#">TC96701</a>  |
| 1768 | <a href="#">DY616304</a> | singleton                |
| 1792 | <a href="#">DY616325</a> | <a href="#">TC106884</a> |
| 1795 | <a href="#">DY616328</a> | <a href="#">TC109740</a> |
| 1798 | <a href="#">DY616330</a> | <a href="#">TC106748</a> |
| 1801 | <a href="#">DY616333</a> | singleton                |
| 1802 | <a href="#">DY616334</a> | <a href="#">TC106560</a> |
| 1803 | <a href="#">DY616335</a> | <a href="#">TC94474</a>  |
| 1805 | <a href="#">DY616337</a> | singleton                |
| 1806 | <a href="#">DY616338</a> | <a href="#">TC95916</a>  |
| 1807 | <a href="#">DY616339</a> | <a href="#">TC106729</a> |
| 1810 | <a href="#">DY616342</a> | <a href="#">TC102486</a> |
| 1811 | <a href="#">DY616343</a> | <a href="#">TC110797</a> |
| 1812 | <a href="#">DY616344</a> | <a href="#">TC106777</a> |
| 1813 | <a href="#">DY616345</a> | <a href="#">TC95233</a>  |
| 1815 | <a href="#">DY616346</a> | <a href="#">TC106674</a> |
| 1816 | <a href="#">DY616347</a> | <a href="#">TC109065</a> |

|      |                          |                          |
|------|--------------------------|--------------------------|
| 1821 | <a href="#">DY616350</a> | singleton                |
| 1822 | <a href="#">DY616351</a> | <a href="#">TC110221</a> |
| 1824 | <a href="#">DY616353</a> | <a href="#">TC94526</a>  |
| 1825 | <a href="#">DY616354</a> | singleton                |
| 1827 | <a href="#">DY616356</a> | <a href="#">TC102274</a> |
| 1828 | <a href="#">DY616357</a> | <a href="#">TC102718</a> |
| 1832 | <a href="#">DY616359</a> | <a href="#">TC96796</a>  |
| 1834 | <a href="#">DY616361</a> | <a href="#">TC100830</a> |
| 1837 | <a href="#">DY616363</a> | <a href="#">TC101753</a> |
| 1841 | <a href="#">DY616367</a> | <a href="#">TC103688</a> |
| 1842 | <a href="#">DY616368</a> | <a href="#">TC107630</a> |
| 1844 | <a href="#">DY616370</a> | <a href="#">TC106334</a> |
| 1846 | <a href="#">DY616372</a> | <a href="#">TC106598</a> |
| 1847 | <a href="#">DY616373</a> | singleton                |
| 1848 | <a href="#">DY616374</a> | singleton                |
| 1849 | <a href="#">DY616375</a> | singleton                |
| 1850 | <a href="#">DY616376</a> | <a href="#">TC97284</a>  |
| 1851 | <a href="#">DY616377</a> | <a href="#">TC95157</a>  |
| 1852 | <a href="#">DY616378</a> | <a href="#">TC101456</a> |
| 1853 | <a href="#">DY616379</a> | <a href="#">TC102497</a> |
| 1854 | <a href="#">DY616380</a> | <a href="#">TC102924</a> |
| 1858 | <a href="#">DY616384</a> | <a href="#">TC94194</a>  |
| 1861 | <a href="#">DY616386</a> | singleton                |
| 1864 | <a href="#">DY616387</a> | <a href="#">TC100894</a> |
| 1870 | <a href="#">DY616389</a> | <a href="#">TC95385</a>  |
| 1871 | <a href="#">DY616390</a> | <a href="#">TC95002</a>  |
| 1872 | <a href="#">DY616391</a> | <a href="#">TC103477</a> |
| 1873 | <a href="#">DY616392</a> | <a href="#">TC104329</a> |
| 1875 | <a href="#">DY616393</a> | <a href="#">TC101752</a> |
| 1876 | <a href="#">DY616394</a> | <a href="#">TC107068</a> |
| 1878 | <a href="#">DY616396</a> | <a href="#">TC101103</a> |
| 1883 | <a href="#">DY616399</a> | <a href="#">TC100590</a> |
| 1884 | <a href="#">DY616400</a> | <a href="#">TC94919</a>  |
| 1888 | <a href="#">DY616403</a> | singleton                |
| 1889 | <a href="#">DY616404</a> | singleton                |
| 1890 | <a href="#">DY616405</a> | <a href="#">TC103322</a> |
| 1892 | <a href="#">DY616407</a> | <a href="#">TC110605</a> |
| 1894 | <a href="#">DY616408</a> | <a href="#">TC107295</a> |
| 1895 | <a href="#">DY616409</a> | <a href="#">TC100203</a> |
| 1899 | <a href="#">DY616413</a> | <a href="#">TC107374</a> |
| 1900 | <a href="#">DY616414</a> | <a href="#">TC99595</a>  |
| 1902 | <a href="#">DY616416</a> | singleton                |
| 1904 | <a href="#">DY616418</a> | <a href="#">TC98974</a>  |
| 1905 | <a href="#">DY616419</a> | <a href="#">TC94752</a>  |
| 1908 | <a href="#">DY616421</a> | singleton                |
| 1909 | <a href="#">DY616422</a> | <a href="#">TC102605</a> |
| 1911 | <a href="#">DY616423</a> | <a href="#">TC101230</a> |
| 1912 | <a href="#">DY616424</a> | <a href="#">TC107654</a> |
| 1914 | <a href="#">DY616426</a> | <a href="#">TC98752</a>  |
| 1915 | <a href="#">DY616427</a> | <a href="#">TC95407</a>  |
| 1916 | <a href="#">DY616428</a> | <a href="#">TC99791</a>  |
| 1917 | <a href="#">DY616429</a> | singleton                |
| 1918 | <a href="#">DY616430</a> | <a href="#">TC107025</a> |
| 1919 | <a href="#">DY616431</a> | <a href="#">TC107494</a> |
| 1920 | <a href="#">DY616432</a> | <a href="#">TC94137</a>  |
| 1921 | <a href="#">DY616433</a> | <a href="#">TC94289</a>  |

|      |                          |                          |
|------|--------------------------|--------------------------|
| 1923 | <a href="#">DY616434</a> | <a href="#">TC106791</a> |
| 1925 | <a href="#">DY616436</a> | <a href="#">TC105580</a> |
| 1926 | <a href="#">DY616437</a> | <a href="#">TC100470</a> |
| 1927 | <a href="#">DY616438</a> | <a href="#">TC107201</a> |
| 1928 | <a href="#">DY616439</a> | <a href="#">TC106904</a> |
| 1929 | <a href="#">DY616440</a> | <a href="#">TC100769</a> |
| 1934 | <a href="#">DY616443</a> | <a href="#">TC107783</a> |
| 1935 | <a href="#">DY616444</a> | <a href="#">TC111473</a> |
| 1936 | <a href="#">DY616445</a> | <a href="#">TC107124</a> |
| 1939 | <a href="#">DY616447</a> | <a href="#">TC95128</a>  |
| 1940 | <a href="#">DY616448</a> | <a href="#">TC95445</a>  |
| 1941 | <a href="#">DY616449</a> | <a href="#">TC101529</a> |
| 1946 | <a href="#">DY616452</a> | <a href="#">TC95420</a>  |
| 1948 | <a href="#">DY616454</a> | <a href="#">TC100667</a> |
| 1949 | <a href="#">DY616455</a> | <a href="#">TC111807</a> |
| 1950 | <a href="#">DY616456</a> | <a href="#">TC100709</a> |
| 1951 | <a href="#">DY616457</a> | <a href="#">TC110643</a> |
| 1952 | <a href="#">DY616458</a> | <a href="#">TC95079</a>  |
| 1953 | <a href="#">DY616459</a> | singleton                |
| 1954 | <a href="#">DY616460</a> | singleton                |
| 1957 | <a href="#">DY616462</a> | singleton                |
| 1958 | <a href="#">DY616463</a> | <a href="#">TC112406</a> |
| 1960 | <a href="#">DY616464</a> | <a href="#">TC107422</a> |
| 2004 | <a href="#">DY616498</a> | <a href="#">TC103370</a> |
| 2005 | <a href="#">DY616499</a> | <a href="#">TC106711</a> |
| 2006 | <a href="#">DY616500</a> | <a href="#">TC105194</a> |
| 2007 | <a href="#">DY616501</a> | <a href="#">TC107073</a> |
| 2008 | <a href="#">DY616502</a> | singleton                |
| 2013 | <a href="#">DY616505</a> | <a href="#">TC108933</a> |
| 2014 | <a href="#">DY616506</a> | <a href="#">TC94610</a>  |
| 2016 | <a href="#">DY616507</a> | singleton                |
| 2019 | <a href="#">DY616509</a> | <a href="#">TC98799</a>  |
| 2020 | <a href="#">DY616510</a> | <a href="#">TC105779</a> |
| 2025 | <a href="#">DY616511</a> | <a href="#">TC95495</a>  |
| 2026 | <a href="#">DY616512</a> | <a href="#">TC106691</a> |
| 2032 | <a href="#">DY616514</a> | <a href="#">TC107107</a> |
| 2035 | <a href="#">DY616516</a> | <a href="#">TC102015</a> |
| 2036 | <a href="#">DY616517</a> | <a href="#">TC95037</a>  |
| 2037 | <a href="#">DY616518</a> | <a href="#">TC101259</a> |
| 2038 | <a href="#">DY616519</a> | <a href="#">TC97021</a>  |
| 2040 | <a href="#">DY616521</a> | <a href="#">TC97438</a>  |
| 2041 | <a href="#">DY616522</a> | <a href="#">TC100761</a> |
| 2042 | <a href="#">DY616523</a> | <a href="#">TC94334</a>  |
| 2044 | <a href="#">DY616525</a> | <a href="#">TC106656</a> |
| 2048 | <a href="#">DY616528</a> | <a href="#">TC108691</a> |
| 2049 | <a href="#">DY616529</a> | <a href="#">TC98608</a>  |
| 2050 | <a href="#">DY616530</a> | <a href="#">TC101128</a> |
| 2051 | <a href="#">DY616531</a> | <a href="#">TC111920</a> |
| 2052 | <a href="#">DY616532</a> | <a href="#">TC101558</a> |
| 2054 | <a href="#">DY616533</a> | <a href="#">TC95175</a>  |
| 2057 | <a href="#">DY616535</a> | <a href="#">TC94971</a>  |
| 2063 | <a href="#">DY616538</a> | singleton                |
| 2065 | <a href="#">DY616540</a> | <a href="#">TC101943</a> |
| 2067 | <a href="#">DY616542</a> | singleton                |
| 2068 | <a href="#">DY616543</a> | <a href="#">TC106622</a> |
| 2069 | <a href="#">DY616544</a> | <a href="#">TC100773</a> |

|      |                          |                          |
|------|--------------------------|--------------------------|
| 2074 | <a href="#">DY616548</a> | <a href="#">TC94745</a>  |
| 2076 | <a href="#">DY616550</a> | <a href="#">TC94802</a>  |
| 2077 | <a href="#">DY616551</a> | singleton                |
| 2078 | <a href="#">DY616552</a> | <a href="#">TC106337</a> |
| 2079 | <a href="#">DY616553</a> | singleton                |
| 2080 | <a href="#">DY616554</a> | <a href="#">TC108714</a> |
| 2081 | <a href="#">DY616555</a> | singleton                |
| 2082 | <a href="#">DY616556</a> | <a href="#">TC94702</a>  |
| 2083 | <a href="#">DY616557</a> | <a href="#">TC101444</a> |
| 2084 | <a href="#">DY616558</a> | <a href="#">TC107252</a> |
| 2086 | <a href="#">DY616560</a> | singleton                |
| 2087 | <a href="#">DY616561</a> | <a href="#">TC107833</a> |
| 2088 | <a href="#">DY616562</a> | <a href="#">TC95035</a>  |
| 2090 | <a href="#">DY616563</a> | singleton                |
| 2091 | <a href="#">DY616564</a> | <a href="#">TC95127</a>  |
| 2092 | <a href="#">DY616565</a> | <a href="#">TC94349</a>  |
| 2094 | <a href="#">DY616566</a> | <a href="#">TC94228</a>  |
| 2096 | <a href="#">DY616568</a> | <a href="#">TC110870</a> |
| 2097 | <a href="#">DY616569</a> | singleton                |
| 2098 | <a href="#">DY616570</a> | <a href="#">TC101764</a> |
| 2099 | <a href="#">DY616571</a> | <a href="#">TC103427</a> |
| 2100 | <a href="#">DY616572</a> | <a href="#">TC106814</a> |
| 2101 | <a href="#">DY616573</a> | <a href="#">TC109412</a> |
| 2102 | <a href="#">DY616574</a> | singleton                |
| 2105 | <a href="#">DY616577</a> | <a href="#">TC95710</a>  |
| 2106 | <a href="#">DY616578</a> | <a href="#">TC101679</a> |
| 2108 | <a href="#">DY616580</a> | <a href="#">TC94953</a>  |
| 2109 | <a href="#">DY616581</a> | <a href="#">TC95439</a>  |
| 2112 | <a href="#">DY616583</a> | <a href="#">TC106330</a> |
| 2113 | <a href="#">DY616584</a> | <a href="#">TC100408</a> |
| 2115 | <a href="#">DY616585</a> | <a href="#">TC101418</a> |
| 2118 | <a href="#">DY616588</a> | <a href="#">TC98616</a>  |
| 2119 | <a href="#">DY616589</a> | <a href="#">TC100149</a> |
| 2120 | <a href="#">DY616590</a> | <a href="#">TC101639</a> |
| 2124 | <a href="#">DY616594</a> | singleton                |
| 2126 | <a href="#">DY616596</a> | <a href="#">TC111120</a> |
| 2127 | <a href="#">DY616597</a> | <a href="#">TC108062</a> |
| 2131 | <a href="#">DY616599</a> | <a href="#">TC94329</a>  |
| 2134 | <a href="#">DY616602</a> | <a href="#">TC107303</a> |
| 2139 | <a href="#">DY616604</a> | <a href="#">TC101262</a> |
| 2140 | <a href="#">DY616605</a> | singleton                |
| 2142 | <a href="#">DY616607</a> | <a href="#">TC106751</a> |
| 2143 | <a href="#">DY616608</a> | singleton                |
| 2146 | <a href="#">DY616611</a> | singleton                |
| 2147 | <a href="#">DY616612</a> | <a href="#">TC100210</a> |
| 2148 | <a href="#">DY616613</a> | singleton                |
| 2149 | <a href="#">DY616614</a> | <a href="#">TC107375</a> |
| 2150 | <a href="#">DY616615</a> | <a href="#">TC95444</a>  |
| 2151 | <a href="#">DY616616</a> | <a href="#">TC94902</a>  |
| 2153 | <a href="#">DY616618</a> | <a href="#">TC106701</a> |
| 2154 | <a href="#">DY616619</a> | <a href="#">TC109630</a> |
| 2155 | <a href="#">DY616620</a> | <a href="#">TC96274</a>  |
| 2156 | <a href="#">DY616621</a> | singleton                |
| 2157 | <a href="#">DY616622</a> | singleton                |
| 2159 | <a href="#">DY616624</a> | <a href="#">TC106530</a> |
| 2160 | <a href="#">DY616625</a> | <a href="#">TC94238</a>  |

|      |                          |                          |
|------|--------------------------|--------------------------|
| 2161 | <a href="#">DY616626</a> | <a href="#">TC107577</a> |
| 2162 | <a href="#">DY616627</a> | <a href="#">TC107574</a> |
| 2163 | <a href="#">DY616628</a> | <a href="#">TC96256</a>  |
| 2164 | <a href="#">DY616629</a> | <a href="#">TC96436</a>  |
| 2166 | <a href="#">DY616631</a> | <a href="#">TC94454</a>  |
| 2168 | <a href="#">DY616632</a> | <a href="#">TC100532</a> |
| 2169 | <a href="#">DY616633</a> | <a href="#">TC93921</a>  |
| 2170 | <a href="#">DY616634</a> | <a href="#">TC94181</a>  |
| 2172 | <a href="#">DY616636</a> | <a href="#">TC95264</a>  |
| 2173 | <a href="#">DY616637</a> | <a href="#">TC94379</a>  |
| 2174 | <a href="#">DY616638</a> | singleton                |
| 2175 | <a href="#">DY616639</a> | <a href="#">TC101023</a> |
| 2176 | <a href="#">DY616640</a> | <a href="#">TC107843</a> |
| 2177 | <a href="#">DY616641</a> | <a href="#">TC100753</a> |
| 2178 | <a href="#">DY616642</a> | <a href="#">TC100770</a> |
| 2180 | <a href="#">DY616643</a> | <a href="#">TC95517</a>  |
| 2187 | <a href="#">DY616646</a> | <a href="#">TC107737</a> |
| 2188 | <a href="#">DY616647</a> | <a href="#">TC101882</a> |
| 2189 | <a href="#">DY616648</a> | <a href="#">TC94795</a>  |
| 2191 | <a href="#">DY616649</a> | <a href="#">TC100314</a> |
| 2194 | <a href="#">DY616650</a> | <a href="#">TC102101</a> |
| 2195 | <a href="#">DY616651</a> | singleton                |
| 2196 | <a href="#">DY616652</a> | <a href="#">TC106441</a> |
| 2197 | <a href="#">DY616653</a> | <a href="#">TC95576</a>  |
| 2198 | <a href="#">DY616654</a> | <a href="#">TC106377</a> |
| 2199 | <a href="#">DY616655</a> | <a href="#">TC100488</a> |
| 2200 | <a href="#">DY616656</a> | <a href="#">TC95688</a>  |
| 2202 | <a href="#">DY616658</a> | singleton                |
| 2204 | <a href="#">DY616659</a> | <a href="#">TC108059</a> |
| 2206 | <a href="#">DY616661</a> | singleton                |
| 2207 | <a href="#">DY616662</a> | <a href="#">TC104949</a> |
| 2208 | <a href="#">DY616663</a> | <a href="#">TC107728</a> |
| 2209 | <a href="#">DY616664</a> | <a href="#">TC109465</a> |
| 2210 | <a href="#">DY616665</a> | <a href="#">TC106952</a> |
| 2211 | <a href="#">DY616666</a> | <a href="#">TC95147</a>  |
| 2212 | <a href="#">DY616667</a> | singleton                |
| 2213 | <a href="#">DY616668</a> | <a href="#">TC101073</a> |
| 2215 | <a href="#">DY616670</a> | <a href="#">TC110231</a> |
| 2216 | <a href="#">DY616671</a> | <a href="#">TC104784</a> |
| 2217 | <a href="#">DY616672</a> | <a href="#">TC94423</a>  |
| 2218 | <a href="#">DY616673</a> | <a href="#">TC106724</a> |
| 2219 | <a href="#">DY616674</a> | <a href="#">TC101889</a> |
| 2220 | <a href="#">DY616675</a> | singleton                |
| 2222 | <a href="#">DY616676</a> | <a href="#">TC95758</a>  |
| 2224 | <a href="#">DY616677</a> | <a href="#">TC97557</a>  |
| 2225 | <a href="#">DY616678</a> | <a href="#">TC95493</a>  |
| 2227 | <a href="#">DY616679</a> | <a href="#">TC109982</a> |
| 2228 | <a href="#">DY616680</a> | <a href="#">TC112390</a> |
| 2229 | <a href="#">DY616681</a> | <a href="#">TC100561</a> |
| 2231 | <a href="#">DY616682</a> | <a href="#">TC104856</a> |
| 2237 | <a href="#">DY616687</a> | <a href="#">TC107772</a> |
| 2238 | <a href="#">DY616688</a> | <a href="#">TC106354</a> |
| 2239 | <a href="#">DY616689</a> | <a href="#">TC108357</a> |
| 2242 | <a href="#">DY616691</a> | <a href="#">TC107235</a> |
| 2243 | <a href="#">DY616692</a> | <a href="#">TC100674</a> |
| 2246 | <a href="#">DY616693</a> | <a href="#">TC95835</a>  |

|      |                          |                          |
|------|--------------------------|--------------------------|
| 2248 | <a href="#">DY616694</a> | <a href="#">TC100291</a> |
| 2249 | <a href="#">DY616695</a> | <a href="#">TC103993</a> |
| 2250 | <a href="#">DY616696</a> | <a href="#">TC100615</a> |
| 2251 | <a href="#">DY616697</a> | <a href="#">TC106807</a> |
| 2254 | <a href="#">DY616698</a> | <a href="#">TC107103</a> |
| 2256 | <a href="#">DY616699</a> | <a href="#">TC101081</a> |
| 2257 | <a href="#">DY616700</a> | singleton                |
| 2259 | <a href="#">DY616702</a> | <a href="#">TC107018</a> |
| 2260 | <a href="#">DY616703</a> | <a href="#">TC103513</a> |
| 2261 | <a href="#">DY616704</a> | <a href="#">TC101506</a> |
| 2262 | <a href="#">DY616705</a> | <a href="#">TC96734</a>  |
| 2263 | <a href="#">DY616706</a> | <a href="#">TC103735</a> |
| 2265 | <a href="#">DY616707</a> | <a href="#">TC95848</a>  |
| 2266 | <a href="#">DY616708</a> | <a href="#">TC107236</a> |
| 2268 | <a href="#">DY616709</a> | <a href="#">TC94934</a>  |
| 2270 | <a href="#">DY616710</a> | <a href="#">TC94702</a>  |
| 2271 | <a href="#">DY616711</a> | <a href="#">TC96131</a>  |
| 2272 | <a href="#">DY616712</a> | <a href="#">TC102832</a> |
| 2275 | <a href="#">DY616714</a> | <a href="#">TC99100</a>  |
| 2276 | <a href="#">DY616715</a> | <a href="#">TC106968</a> |
| 2279 | <a href="#">DY616717</a> | singleton                |
| 2282 | <a href="#">DY616720</a> | <a href="#">TC96223</a>  |
| 2283 | <a href="#">DY616721</a> | singleton                |
| 2286 | <a href="#">DY616722</a> | <a href="#">TC104365</a> |
| 2287 | <a href="#">DY616723</a> | <a href="#">TC111649</a> |
| 2288 | <a href="#">DY616724</a> | <a href="#">TC108034</a> |
| 2289 | <a href="#">DY616725</a> | <a href="#">TC101590</a> |
| 2290 | <a href="#">DY616726</a> | <a href="#">TC109454</a> |
| 2292 | <a href="#">DY616727</a> | <a href="#">TC103802</a> |
| 2296 | <a href="#">DY616730</a> | <a href="#">TC101971</a> |
| 2299 | <a href="#">DY616731</a> | <a href="#">TC101314</a> |
| 2302 | <a href="#">DY616733</a> | <a href="#">TC97740</a>  |
| 2305 | <a href="#">DY616734</a> | <a href="#">TC100409</a> |
| 2310 | <a href="#">DY616735</a> | <a href="#">TC109783</a> |
| 2315 | <a href="#">DY616736</a> | <a href="#">TC106503</a> |
| 2316 | <a href="#">DY616737</a> | <a href="#">TC108835</a> |
| 2317 | <a href="#">DY616738</a> | <a href="#">TC108455</a> |
| 2319 | <a href="#">DY616739</a> | <a href="#">TC100876</a> |
| 2320 | <a href="#">DY616740</a> | <a href="#">TC106642</a> |
| 2321 | <a href="#">DY616741</a> | <a href="#">TC98248</a>  |
| 2322 | <a href="#">DY616742</a> | singleton                |
| 2325 | <a href="#">DY616743</a> | <a href="#">TC95426</a>  |
| 2326 | <a href="#">DY616744</a> | <a href="#">TC111306</a> |
| 2327 | <a href="#">DY616745</a> | <a href="#">TC99787</a>  |
| 2328 | <a href="#">DY616746</a> | <a href="#">TC107837</a> |
| 2330 | <a href="#">DY616748</a> | <a href="#">TC96352</a>  |
| 2331 | <a href="#">DY616749</a> | singleton                |
| 2332 | <a href="#">DY616750</a> | singleton                |
| 2333 | <a href="#">DY616751</a> | <a href="#">TC101174</a> |
| 2334 | <a href="#">DY616752</a> | singleton                |
| 2335 | <a href="#">DY616753</a> | <a href="#">TC101297</a> |
| 2336 | <a href="#">DY616754</a> | <a href="#">TC94011</a>  |
| 2337 | <a href="#">DY616755</a> | <a href="#">TC106452</a> |
| 2338 | <a href="#">DY616756</a> | singleton                |
| 2339 | <a href="#">DY616757</a> | <a href="#">TC100435</a> |
| 2341 | <a href="#">DY616758</a> | <a href="#">TC103086</a> |

|      |                          |                          |
|------|--------------------------|--------------------------|
| 2342 | <a href="#">DY616759</a> | <a href="#">TC100706</a> |
| 2343 | <a href="#">DY616760</a> | <a href="#">TC101470</a> |
| 2344 | <a href="#">DY616761</a> | <a href="#">TC102092</a> |
| 2348 | <a href="#">DY616764</a> | <a href="#">TC106346</a> |
| 2350 | <a href="#">DY616765</a> | <a href="#">TC97485</a>  |
| 2351 | <a href="#">DY616766</a> | <a href="#">TC107254</a> |
| 2352 | <a href="#">DY616767</a> | <a href="#">TC102816</a> |
| 2354 | <a href="#">DY616769</a> | singleton                |
| 2355 | <a href="#">DY616770</a> | singleton                |
| 2356 | <a href="#">DY616771</a> | <a href="#">TC97699</a>  |
| 2357 | <a href="#">DY616772</a> | singleton                |
| 2358 | <a href="#">DY616773</a> | <a href="#">TC100753</a> |
| 2359 | <a href="#">DY616774</a> | singleton                |
| 2360 | <a href="#">DY616775</a> | <a href="#">TC106367</a> |
| 2362 | <a href="#">DY616776</a> | singleton                |
| 2363 | <a href="#">DY616777</a> | <a href="#">TC94492</a>  |
| 2364 | <a href="#">DY616778</a> | <a href="#">TC101216</a> |
| 2365 | <a href="#">DY616779</a> | <a href="#">TC103708</a> |
| 2367 | <a href="#">DY616780</a> | <a href="#">TC100335</a> |
| 2368 | <a href="#">DY616781</a> | <a href="#">TC100151</a> |
| 2369 | <a href="#">DY616782</a> | <a href="#">TC106845</a> |
| 2373 | <a href="#">DY616784</a> | <a href="#">TC107459</a> |
| 2374 | <a href="#">DY616785</a> | <a href="#">TC101595</a> |
| 2376 | <a href="#">DY616786</a> | <a href="#">TC95075</a>  |
| 2379 | <a href="#">DY616789</a> | <a href="#">TC107456</a> |
| 2383 | <a href="#">DY616791</a> | <a href="#">TC106707</a> |
| 2387 | <a href="#">DY616792</a> | <a href="#">TC102193</a> |
| 2388 | <a href="#">DY616793</a> | <a href="#">TC102918</a> |
| 2392 | <a href="#">DY616796</a> | <a href="#">TC94128</a>  |
| 2393 | <a href="#">DY616797</a> | <a href="#">TC101281</a> |
| 2394 | <a href="#">DY616798</a> | <a href="#">TC95833</a>  |
| 2395 | <a href="#">DY616799</a> | <a href="#">TC112392</a> |
| 2399 | <a href="#">DY616801</a> | singleton                |
| 2403 | <a href="#">DY616804</a> | <a href="#">TC108323</a> |
| 2404 | <a href="#">DY616805</a> | <a href="#">TC111851</a> |
| 2407 | <a href="#">DY616808</a> | <a href="#">TC103563</a> |
| 2408 | <a href="#">DY616809</a> | <a href="#">TC101217</a> |
| 2409 | <a href="#">DY616810</a> | <a href="#">TC105179</a> |
| 2410 | <a href="#">DY616811</a> | <a href="#">TC95512</a>  |
| 2411 | <a href="#">DY616812</a> | singleton                |
| 2412 | <a href="#">DY616813</a> | singleton                |
| 2413 | <a href="#">DY616814</a> | <a href="#">TC106920</a> |
| 2414 | <a href="#">DY616815</a> | <a href="#">TC103149</a> |
| 2416 | <a href="#">DY616816</a> | singleton                |
| 2422 | <a href="#">DY616820</a> | singleton                |
| 2423 | <a href="#">DY616821</a> | <a href="#">TC100662</a> |
| 2424 | <a href="#">DY616822</a> | <a href="#">TC95098</a>  |
| 2425 | <a href="#">DY616823</a> | <a href="#">TC101237</a> |
| 2426 | <a href="#">DY616824</a> | <a href="#">TC95256</a>  |
| 2428 | <a href="#">DY616826</a> | <a href="#">TC94295</a>  |
| 2431 | <a href="#">DY616828</a> | <a href="#">TC107634</a> |
| 2432 | <a href="#">DY616829</a> | singleton                |
| 2439 | <a href="#">DY616831</a> | <a href="#">TC106855</a> |
| 2441 | <a href="#">DY616832</a> | <a href="#">TC100199</a> |
| 2447 | <a href="#">DY616834</a> | <a href="#">TC104501</a> |
| 2449 | <a href="#">DY616835</a> | <a href="#">TC100744</a> |



|      |                          |                          |
|------|--------------------------|--------------------------|
| 2453 | <a href="#">DY616836</a> | <a href="#">TC94302</a>  |
| 2456 | <a href="#">DY616837</a> | <a href="#">TC109032</a> |
| 2458 | <a href="#">DY616839</a> | singleton                |
| 2459 | <a href="#">DY616840</a> | <a href="#">TC103670</a> |
| 2461 | <a href="#">DY616841</a> | <a href="#">TC100321</a> |
| 2463 | <a href="#">DY616843</a> | singleton                |
| 2465 | <a href="#">DY616845</a> | singleton                |
| 2468 | <a href="#">DY616846</a> | singleton                |
| 2470 | <a href="#">DY616848</a> | <a href="#">TC107091</a> |
| 2471 | <a href="#">DY616849</a> | <a href="#">TC100165</a> |
| 2472 | <a href="#">DY616850</a> | <a href="#">TC106874</a> |
| 2483 | <a href="#">DY616858</a> | <a href="#">TC100515</a> |
| 2484 | <a href="#">DY616859</a> | singleton                |
| 2485 | <a href="#">DY616860</a> | singleton                |
| 2486 | <a href="#">DY616861</a> | <a href="#">TC100179</a> |
| 2491 | <a href="#">DY616864</a> | <a href="#">TC93965</a>  |
| 2492 | <a href="#">DY616865</a> | <a href="#">TC102085</a> |
| 2493 | <a href="#">DY616866</a> | <a href="#">TC108788</a> |
| 2494 | <a href="#">DY616867</a> | singleton                |
| 2498 | <a href="#">DY616870</a> | <a href="#">TC108234</a> |
| 2500 | <a href="#">DY616872</a> | <a href="#">TC107110</a> |
| 2501 | <a href="#">DY616873</a> | <a href="#">TC110647</a> |
| 2502 | <a href="#">DY616874</a> | singleton                |
| 2503 | <a href="#">DY616875</a> | <a href="#">TC96368</a>  |
| 2504 | <a href="#">DY616876</a> | <a href="#">TC100847</a> |
| 2505 | <a href="#">DY616877</a> | <a href="#">TC106736</a> |
| 2509 | <a href="#">DY616878</a> | singleton                |
| 2510 | <a href="#">DY616879</a> | singleton                |
| 2511 | <a href="#">DY616880</a> | <a href="#">TC94471</a>  |
| 2512 | <a href="#">DY616881</a> | <a href="#">TC99653</a>  |
| 2513 | <a href="#">DY616882</a> | singleton                |
| 2514 | <a href="#">DY616883</a> | <a href="#">TC106714</a> |
| 2515 | <a href="#">DY616884</a> | <a href="#">TC108792</a> |
| 2516 | <a href="#">DY616885</a> | <a href="#">TC109197</a> |
| 2517 | <a href="#">DY616886</a> | singleton                |
| 2520 | <a href="#">DY616888</a> | <a href="#">TC101160</a> |
| 2522 | <a href="#">DY616889</a> | <a href="#">TC98931</a>  |
| 2523 | <a href="#">DY616890</a> | singleton                |
| 2525 | <a href="#">DY616891</a> | <a href="#">TC102114</a> |
| 2530 | <a href="#">DY616895</a> | <a href="#">TC100502</a> |
| 2535 | <a href="#">DY616898</a> | singleton                |
| 2539 | <a href="#">DY616901</a> | <a href="#">TC100701</a> |
| 2540 | <a href="#">DY616902</a> | singleton                |
| 2541 | <a href="#">DY616903</a> | singleton                |
| 2542 | <a href="#">DY616904</a> | singleton                |
| 2544 | <a href="#">DY616906</a> | singleton                |
| 2545 | <a href="#">DY616907</a> | <a href="#">TC97955</a>  |
| 2547 | <a href="#">DY616908</a> | singleton                |
| 2548 | <a href="#">DY616909</a> | singleton                |
| 2551 | <a href="#">DY616910</a> | <a href="#">TC96755</a>  |
| 2553 | <a href="#">DY616912</a> | <a href="#">TC107443</a> |
| 2561 | <a href="#">DY616917</a> | singleton                |
| 2562 | <a href="#">DY616918</a> | <a href="#">TC94486</a>  |
| 2565 | <a href="#">DY616920</a> | <a href="#">TC106518</a> |
| 2566 | <a href="#">DY616921</a> | <a href="#">TC94341</a>  |
| 2568 | <a href="#">DY616922</a> | <a href="#">TC100718</a> |

|      |                          |                          |
|------|--------------------------|--------------------------|
| 2569 | <a href="#">DY616923</a> | <a href="#">TC106418</a> |
| 2572 | <a href="#">DY616924</a> | singleton                |
| 2574 | <a href="#">DY616925</a> | <a href="#">TC107581</a> |
| 2577 | <a href="#">DY616926</a> | singleton                |
| 2578 | <a href="#">DY616927</a> | <a href="#">TC100561</a> |
| 2579 | <a href="#">DY616928</a> | singleton                |
| 2581 | <a href="#">DY616929</a> | <a href="#">TC97251</a>  |
| 2582 | <a href="#">DY616930</a> | <a href="#">TC94850</a>  |
| 2584 | <a href="#">DY616932</a> | <a href="#">TC101066</a> |
| 2585 | <a href="#">DY616933</a> | <a href="#">TC101142</a> |
| 2588 | <a href="#">DY616935</a> | <a href="#">TC94400</a>  |
| 2589 | <a href="#">DY616936</a> | <a href="#">TC101024</a> |
| 2590 | <a href="#">DY616937</a> | <a href="#">TC94500</a>  |
| 2591 | <a href="#">DY616938</a> | singleton                |
| 2592 | <a href="#">DY616939</a> | singleton                |
| 2595 | <a href="#">DY616942</a> | <a href="#">TC100824</a> |
| 2596 | <a href="#">DY616943</a> | <a href="#">TC107533</a> |
| 2597 | <a href="#">DY616944</a> | <a href="#">TC100588</a> |
| 2598 | <a href="#">DY616945</a> | <a href="#">TC94282</a>  |
| 2601 | <a href="#">DY616946</a> | singleton                |
| 2602 | <a href="#">DY616947</a> | singleton                |
| 2605 | <a href="#">DY616950</a> | <a href="#">TC107083</a> |
| 2608 | <a href="#">DY616952</a> | <a href="#">TC108328</a> |
| 2609 | <a href="#">DY616953</a> | <a href="#">TC108909</a> |
| 2610 | <a href="#">DY616954</a> | <a href="#">TC100565</a> |
| 2611 | <a href="#">DY616955</a> | <a href="#">TC110306</a> |
| 2612 | <a href="#">DY616956</a> | <a href="#">TC97025</a>  |
| 2615 | <a href="#">DY616957</a> | <a href="#">TC107035</a> |
| 2616 | <a href="#">DY616958</a> | <a href="#">TC104393</a> |
| 2617 | <a href="#">DY616959</a> | <a href="#">TC93926</a>  |
| 2618 | <a href="#">DY616960</a> | <a href="#">TC97791</a>  |
| 2619 | <a href="#">DY616961</a> | <a href="#">TC108156</a> |
| 2621 | <a href="#">DY616963</a> | <a href="#">TC106798</a> |
| 2622 | <a href="#">DY616964</a> | singleton                |
| 2623 | <a href="#">DY616965</a> | <a href="#">TC96910</a>  |
| 2624 | <a href="#">DY616966</a> | <a href="#">TC110721</a> |
| 2625 | <a href="#">DY616967</a> | <a href="#">TC94674</a>  |
| 2627 | <a href="#">DY616969</a> | <a href="#">TC102992</a> |
| 2630 | <a href="#">DY616972</a> | singleton                |
| 2631 | <a href="#">DY616973</a> | <a href="#">TC94663</a>  |
| 2632 | <a href="#">DY616974</a> | <a href="#">TC94104</a>  |
| 2633 | <a href="#">DY616975</a> | <a href="#">TC94600</a>  |
| 2636 | <a href="#">DY616977</a> | <a href="#">TC107081</a> |
| 2638 | <a href="#">DY616978</a> | singleton                |
| 2639 | <a href="#">DY616979</a> | <a href="#">TC106901</a> |
| 2640 | <a href="#">DY616980</a> | <a href="#">TC95022</a>  |
| 2645 | <a href="#">DY616981</a> | <a href="#">TC100558</a> |
| 2646 | <a href="#">DY616982</a> | <a href="#">TC100147</a> |
| 2647 | <a href="#">DY616983</a> | <a href="#">TC106794</a> |
| 2650 | <a href="#">DY616985</a> | <a href="#">TC95965</a>  |
| 2653 | <a href="#">DY616986</a> | singleton                |
| 2654 | <a href="#">DY616987</a> | <a href="#">TC101392</a> |
| 2655 | <a href="#">DY616988</a> | <a href="#">TC111248</a> |
| 2656 | <a href="#">DY616989</a> | <a href="#">TC107417</a> |
| 2657 | <a href="#">DY616990</a> | <a href="#">TC95584</a>  |
| 2658 | <a href="#">DY616991</a> | singleton                |

|      |                          |                          |
|------|--------------------------|--------------------------|
| 2663 | <a href="#">DY616994</a> | <a href="#">TC108442</a> |
| 2664 | <a href="#">DY616995</a> | <a href="#">TC94512</a>  |
| 2665 | <a href="#">DY616996</a> | <a href="#">TC108957</a> |
| 2666 | <a href="#">DY616997</a> | singleton                |
| 2668 | <a href="#">DY616998</a> | singleton                |
| 2669 | <a href="#">DY616999</a> | <a href="#">TC94897</a>  |
| 2670 | <a href="#">DY617000</a> | <a href="#">TC101429</a> |
| 2676 | <a href="#">DY617002</a> | <a href="#">TC94846</a>  |
| 2679 | <a href="#">DY617003</a> | <a href="#">TC108199</a> |
| 2681 | <a href="#">DY617005</a> | <a href="#">TC108603</a> |
| 2682 | <a href="#">DY617006</a> | <a href="#">TC107731</a> |
| 2684 | <a href="#">DY617008</a> | <a href="#">TC100497</a> |
| 2686 | <a href="#">DY617009</a> | <a href="#">TC109528</a> |
| 2691 | <a href="#">DY617014</a> | <a href="#">TC108094</a> |
| 2693 | <a href="#">DY617016</a> | <a href="#">TC106660</a> |
| 2694 | <a href="#">DY617017</a> | singleton                |
| 2696 | <a href="#">DY617019</a> | <a href="#">TC100999</a> |
| 2698 | <a href="#">DY617020</a> | <a href="#">TC104786</a> |
| 2699 | <a href="#">DY617021</a> | <a href="#">TC95981</a>  |
| 2701 | <a href="#">DY617023</a> | <a href="#">TC94264</a>  |
| 2703 | <a href="#">DY617025</a> | <a href="#">TC94604</a>  |
| 2706 | <a href="#">DY617028</a> | <a href="#">TC96346</a>  |
| 2707 | <a href="#">DY617029</a> | <a href="#">TC94703</a>  |
| 2711 | <a href="#">DY617032</a> | <a href="#">TC103043</a> |
| 2712 | <a href="#">DY617033</a> | <a href="#">TC95709</a>  |
| 2713 | <a href="#">DY617034</a> | <a href="#">TC94896</a>  |
| 2714 | <a href="#">DY617035</a> | <a href="#">TC100827</a> |
| 2715 | <a href="#">DY617036</a> | singleton                |
| 2716 | <a href="#">DY617037</a> | <a href="#">TC95106</a>  |
| 2717 | <a href="#">DY617038</a> | <a href="#">TC107015</a> |
| 2718 | <a href="#">DY617039</a> | singleton                |
| 2719 | <a href="#">DY617040</a> | <a href="#">TC103908</a> |
| 2720 | <a href="#">DY617041</a> | <a href="#">TC105817</a> |
| 2721 | <a href="#">DY617042</a> | singleton                |
| 2722 | <a href="#">DY617043</a> | singleton                |
| 2724 | <a href="#">DY617045</a> | singleton                |
| 2725 | <a href="#">DY617046</a> | <a href="#">TC106753</a> |
| 2729 | <a href="#">DY617050</a> | <a href="#">TC94357</a>  |
| 2730 | <a href="#">DY617051</a> | <a href="#">TC97624</a>  |
| 2731 | <a href="#">DY617052</a> | <a href="#">TC107591</a> |
| 2736 | <a href="#">DY617056</a> | <a href="#">TC106909</a> |
| 2740 | <a href="#">DY617059</a> | <a href="#">TC94335</a>  |
| 2742 | <a href="#">DY617061</a> | singleton                |
| 2743 | <a href="#">DY617062</a> | <a href="#">TC107723</a> |
| 2744 | <a href="#">DY617063</a> | <a href="#">TC95492</a>  |
| 2747 | <a href="#">DY617064</a> | <a href="#">TC94823</a>  |
| 2748 | <a href="#">DY617065</a> | <a href="#">TC96758</a>  |
| 2749 | <a href="#">DY617066</a> | <a href="#">TC100519</a> |
| 2751 | <a href="#">DY617068</a> | <a href="#">TC100767</a> |
| 2752 | <a href="#">DY617069</a> | singleton                |
| 2754 | <a href="#">DY617071</a> | singleton                |
| 2755 | <a href="#">DY617072</a> | <a href="#">TC94938</a>  |
| 2756 | <a href="#">DY617073</a> | <a href="#">TC107009</a> |
| 2758 | <a href="#">DY617074</a> | <a href="#">TC107225</a> |
| 2762 | <a href="#">DY617077</a> | <a href="#">TC100512</a> |
| 2764 | <a href="#">DY617079</a> | singleton                |

|      |                          |                          |
|------|--------------------------|--------------------------|
| 2766 | <a href="#">DY617080</a> | <a href="#">TC106032</a> |
| 2768 | <a href="#">DY617081</a> | <a href="#">TC103102</a> |
| 2769 | <a href="#">DY617082</a> | <a href="#">TC96871</a>  |
| 2771 | <a href="#">DY617083</a> | <a href="#">TC106375</a> |
| 2772 | <a href="#">DY617084</a> | <a href="#">TC106095</a> |
| 2773 | <a href="#">DY617085</a> | <a href="#">TC94023</a>  |
| 2774 | <a href="#">DY617086</a> | <a href="#">TC106545</a> |
| 2775 | <a href="#">DY617087</a> | <a href="#">TC94154</a>  |
| 2777 | <a href="#">DY617089</a> | <a href="#">TC94088</a>  |
| 2778 | <a href="#">DY617090</a> | <a href="#">TC96682</a>  |
| 2779 | <a href="#">DY617091</a> | <a href="#">TC101263</a> |
| 2782 | <a href="#">DY617093</a> | <a href="#">TC95945</a>  |
| 2784 | <a href="#">DY617094</a> | <a href="#">TC94953</a>  |
| 2788 | <a href="#">DY617097</a> | <a href="#">TC95638</a>  |
| 2792 | <a href="#">DY617101</a> | <a href="#">TC103250</a> |
| 2794 | <a href="#">DY617102</a> | <a href="#">TC94369</a>  |
| 2795 | <a href="#">DY617103</a> | <a href="#">TC96805</a>  |
| 2798 | <a href="#">DY617105</a> | <a href="#">TC94365</a>  |
| 2799 | <a href="#">DY617106</a> | singleton                |
| 2800 | <a href="#">DY617107</a> | singleton                |
| 2801 | <a href="#">DY617108</a> | <a href="#">TC104687</a> |
| 2805 | <a href="#">DY617112</a> | <a href="#">TC95942</a>  |
| 2808 | <a href="#">DY617115</a> | <a href="#">TC97643</a>  |
| 2809 | <a href="#">DY617116</a> | <a href="#">TC94689</a>  |
| 2810 | <a href="#">DY617117</a> | <a href="#">TC106707</a> |
| 2812 | <a href="#">DY617119</a> | <a href="#">TC96316</a>  |
| 2813 | <a href="#">DY617120</a> | <a href="#">TC100917</a> |
| 2814 | <a href="#">DY617121</a> | singleton                |
| 2815 | <a href="#">DY617122</a> | <a href="#">TC107756</a> |
| 2816 | <a href="#">DY617123</a> | <a href="#">TC94660</a>  |
| 2818 | <a href="#">DY617125</a> | <a href="#">TC102709</a> |
| 2819 | <a href="#">DY617126</a> | singleton                |
| 2820 | <a href="#">DY617127</a> | <a href="#">TC100393</a> |
| 2822 | <a href="#">DY617128</a> | singleton                |
| 2825 | <a href="#">DY617131</a> | <a href="#">TC101443</a> |
| 2831 | <a href="#">DY617136</a> | singleton                |
| 2834 | <a href="#">DY617139</a> | singleton                |
| 2835 | <a href="#">DY617140</a> | singleton                |
| 2836 | <a href="#">DY617141</a> | <a href="#">TC100820</a> |
| 2837 | <a href="#">DY617142</a> | <a href="#">TC112090</a> |
| 2840 | <a href="#">DY617143</a> | <a href="#">TC95306</a>  |
| 2842 | <a href="#">DY617145</a> | <a href="#">TC107674</a> |
| 2843 | <a href="#">DY617146</a> | <a href="#">TC95167</a>  |
| 2850 | <a href="#">DY617147</a> | <a href="#">TC96701</a>  |
| 2851 | <a href="#">DY617148</a> | <a href="#">TC108167</a> |
| 2854 | <a href="#">DY617150</a> | singleton                |
| 2855 | <a href="#">DY617151</a> | <a href="#">TC110063</a> |
| 2857 | <a href="#">DY617153</a> | <a href="#">TC104358</a> |
| 2862 | <a href="#">DY617156</a> | <a href="#">TC94842</a>  |
| 2863 | <a href="#">DY617157</a> | singleton                |
| 2864 | <a href="#">DY617158</a> | singleton                |
| 2867 | <a href="#">DY617161</a> | <a href="#">TC107096</a> |
| 2868 | <a href="#">DY617162</a> | <a href="#">TC101780</a> |
| 2869 | <a href="#">DY617163</a> | <a href="#">TC100723</a> |
| 2873 | <a href="#">DY617165</a> | singleton                |
| 2882 | <a href="#">DY617167</a> | <a href="#">TC97615</a>  |

|      |                          |                          |
|------|--------------------------|--------------------------|
| 2883 | <a href="#">DY617168</a> | <a href="#">TC97930</a>  |
| 2884 | <a href="#">DY617169</a> | singleton                |
| 2885 | <a href="#">DY617170</a> | <a href="#">TC107174</a> |
| 2889 | <a href="#">DY617172</a> | <a href="#">TC100247</a> |
| 2896 | <a href="#">DY617175</a> | <a href="#">TC97716</a>  |
| 2897 | <a href="#">DY617176</a> | <a href="#">TC108958</a> |
| 2898 | <a href="#">DY617177</a> | <a href="#">TC107210</a> |
| 2899 | <a href="#">DY617178</a> | singleton                |
| 2901 | <a href="#">DY617179</a> | <a href="#">TC106315</a> |
| 2903 | <a href="#">DY617181</a> | <a href="#">TC108172</a> |
| 2904 | <a href="#">DY617182</a> | <a href="#">TC100309</a> |
| 2905 | <a href="#">DY617183</a> | <a href="#">TC107773</a> |
| 2910 | <a href="#">DY617186</a> | <a href="#">TC105136</a> |
| 2911 | <a href="#">DY617187</a> | <a href="#">TC108808</a> |
| 2916 | <a href="#">DY617189</a> | <a href="#">TC106214</a> |
| 2917 | <a href="#">DY617190</a> | <a href="#">TC106470</a> |
| 2919 | <a href="#">DY617192</a> | <a href="#">TC101257</a> |
| 2921 | <a href="#">DY617193</a> | <a href="#">TC103191</a> |
| 2922 | <a href="#">DY617194</a> | singleton                |
| 2924 | <a href="#">DY617195</a> | <a href="#">TC107194</a> |
| 2925 | <a href="#">DY617196</a> | <a href="#">TC102991</a> |
| 2926 | <a href="#">DY617197</a> | <a href="#">TC107969</a> |
| 2927 | <a href="#">DY617198</a> | <a href="#">TC100398</a> |
| 2928 | <a href="#">DY617199</a> | <a href="#">TC101851</a> |
| 2929 | <a href="#">DY617200</a> | singleton                |
| 2931 | <a href="#">DY617201</a> | <a href="#">TC108861</a> |
| 2932 | <a href="#">DY617202</a> | singleton                |
| 2934 | <a href="#">DY617203</a> | singleton                |
| 2937 | <a href="#">DY617204</a> | <a href="#">TC94797</a>  |
| 2940 | <a href="#">DY617206</a> | <a href="#">TC103169</a> |
| 2943 | <a href="#">DY617207</a> | <a href="#">TC94214</a>  |
| 2944 | <a href="#">DY617208</a> | <a href="#">TC100833</a> |
| 2952 | <a href="#">DY617209</a> | <a href="#">TC109056</a> |
| 2953 | <a href="#">DY617210</a> | singleton                |
| 2961 | <a href="#">DY617211</a> | singleton                |
| 2964 | <a href="#">DY617213</a> | <a href="#">TC96158</a>  |
| 2965 | <a href="#">DY617214</a> | <a href="#">TC106438</a> |
| 2966 | <a href="#">DY617215</a> | singleton                |
| 2967 | <a href="#">DY617216</a> | <a href="#">TC103144</a> |
| 2970 | <a href="#">DY617217</a> | <a href="#">TC96899</a>  |
| 2972 | <a href="#">DY617218</a> | singleton                |
| 2974 | <a href="#">DY617220</a> | <a href="#">TC96114</a>  |
| 2981 | <a href="#">DY617225</a> | <a href="#">TC101201</a> |
| 2985 | <a href="#">DY617226</a> | <a href="#">TC98832</a>  |
| 2997 | <a href="#">DY617230</a> | <a href="#">TC106918</a> |
| 2999 | <a href="#">DY617232</a> | <a href="#">TC94003</a>  |
| 3007 | <a href="#">DY617236</a> | <a href="#">TC106810</a> |
| 3008 | <a href="#">DY617237</a> | <a href="#">TC106629</a> |
| 3009 | <a href="#">DY617238</a> | <a href="#">TC111230</a> |
| 3013 | <a href="#">DY617239</a> | <a href="#">TC112500</a> |
| 3014 | <a href="#">DY617240</a> | singleton                |
| 3018 | <a href="#">DY617242</a> | <a href="#">TC100633</a> |
| 3020 | <a href="#">DY617243</a> | <a href="#">TC109073</a> |
| 3021 | <a href="#">DY617244</a> | singleton                |
| 3023 | <a href="#">DY617245</a> | <a href="#">TC103568</a> |
| 3024 | <a href="#">DY617246</a> | <a href="#">TC100654</a> |

|      |                          |                          |
|------|--------------------------|--------------------------|
| 3025 | <a href="#">DY617247</a> | <a href="#">TC109724</a> |
| 3026 | <a href="#">DY617248</a> | <a href="#">TC106726</a> |
| 3027 | <a href="#">DY617249</a> | singleton                |
| 3028 | <a href="#">DY617250</a> | <a href="#">TC103997</a> |
| 3029 | <a href="#">DY617251</a> | singleton                |
| 3031 | <a href="#">DY617252</a> | <a href="#">TC106723</a> |
| 3032 | <a href="#">DY617253</a> | <a href="#">TC100447</a> |
| 3034 | <a href="#">DY617255</a> | <a href="#">TC104243</a> |
| 3039 | <a href="#">DY617256</a> | <a href="#">TC101919</a> |
| 3040 | <a href="#">DY617257</a> | <a href="#">TC100949</a> |
| 3050 | <a href="#">DY617259</a> | singleton                |
| 3056 | <a href="#">DY617261</a> | <a href="#">TC93937</a>  |
| 3058 | <a href="#">DY617262</a> | <a href="#">TC100613</a> |
| 3068 | <a href="#">DY617265</a> | singleton                |
| 3070 | <a href="#">DY617267</a> | <a href="#">TC107478</a> |
| 3072 | <a href="#">DY617268</a> | <a href="#">TC107686</a> |
| 3074 | <a href="#">DY617270</a> | <a href="#">TC102389</a> |
| 3076 | <a href="#">DY617271</a> | <a href="#">TC100785</a> |
| 3077 | <a href="#">DY617272</a> | <a href="#">TC109820</a> |
| 3080 | <a href="#">DY617273</a> | <a href="#">TC100810</a> |
| 3093 | <a href="#">DY617276</a> | <a href="#">TC94731</a>  |
| 3098 | <a href="#">DY617278</a> | <a href="#">TC95783</a>  |
| 3099 | <a href="#">DY617279</a> | <a href="#">TC106356</a> |
| 3101 | <a href="#">DY617280</a> | <a href="#">TC105747</a> |
| 3103 | <a href="#">DY617281</a> | singleton                |
| 3104 | <a href="#">DY617282</a> | <a href="#">TC103328</a> |
| 3105 | <a href="#">DY617283</a> | <a href="#">TC94546</a>  |
| 3109 | <a href="#">DY617284</a> | singleton                |
| 3111 | <a href="#">DY617286</a> | <a href="#">TC100893</a> |
| 3114 | <a href="#">DY617288</a> | <a href="#">TC103946</a> |
| 3116 | <a href="#">DY617290</a> | <a href="#">TC94337</a>  |
| 3120 | <a href="#">DY617292</a> | <a href="#">TC108864</a> |
| 3122 | <a href="#">DY617294</a> | <a href="#">TC95550</a>  |
| 3123 | <a href="#">DY617295</a> | <a href="#">TC101745</a> |
| 3124 | <a href="#">DY617296</a> | <a href="#">TC95184</a>  |
| 3128 | <a href="#">DY617298</a> | <a href="#">TC96367</a>  |
| 3133 | <a href="#">DY617300</a> | <a href="#">TC107212</a> |
| 3135 | <a href="#">DY617301</a> | singleton                |
| 3137 | <a href="#">DY617302</a> | <a href="#">TC96408</a>  |
| 3148 | <a href="#">DY617304</a> | <a href="#">TC107637</a> |
| 3152 | <a href="#">DY617306</a> | singleton                |
| 3156 | <a href="#">DY617308</a> | singleton                |
| 3161 | <a href="#">DY617310</a> | <a href="#">TC108295</a> |
| 3165 | <a href="#">DY617311</a> | <a href="#">TC108316</a> |
| 3166 | <a href="#">DY617312</a> | <a href="#">TC110777</a> |
| 3175 | <a href="#">DY617315</a> | <a href="#">TC103296</a> |
| 3181 | <a href="#">DY617317</a> | singleton                |
| 3182 | <a href="#">DY617318</a> | <a href="#">TC104117</a> |
| 3183 | <a href="#">DY617319</a> | <a href="#">TC101991</a> |
| 3191 | <a href="#">DY617323</a> | <a href="#">TC107034</a> |
| 3194 | <a href="#">DY617325</a> | <a href="#">TC97070</a>  |
| 3196 | <a href="#">DY617326</a> | <a href="#">TC107742</a> |
| 3199 | <a href="#">DY617328</a> | <a href="#">TC100122</a> |
| 3202 | <a href="#">DY617330</a> | <a href="#">TC102486</a> |
| 3205 | <a href="#">DY617331</a> | singleton                |
| 3206 | <a href="#">DY617332</a> | <a href="#">TC102562</a> |

|      |                          |                          |
|------|--------------------------|--------------------------|
| 3207 | <a href="#">DY617333</a> | <a href="#">TC94534</a>  |
| 3208 | <a href="#">DY617334</a> | <a href="#">TC95178</a>  |
| 3210 | <a href="#">DY617335</a> | <a href="#">TC95000</a>  |
| 3212 | <a href="#">DY617337</a> | singleton                |
| 3218 | <a href="#">DY617340</a> | <a href="#">TC107391</a> |
| 3223 | <a href="#">DY617342</a> | <a href="#">TC93928</a>  |
| 3226 | <a href="#">DY617344</a> | <a href="#">TC100768</a> |
| 3227 | <a href="#">DY617345</a> | singleton                |
| 3229 | <a href="#">DY617346</a> | <a href="#">TC94313</a>  |
| 3230 | <a href="#">DY617347</a> | singleton                |
| 3233 | <a href="#">DY617348</a> | <a href="#">TC106987</a> |
| 3235 | <a href="#">DY617349</a> | <a href="#">TC100041</a> |
| 3236 | <a href="#">DY617350</a> | <a href="#">TC95044</a>  |
| 3239 | <a href="#">DY617352</a> | <a href="#">TC106862</a> |
| 3245 | <a href="#">DY617357</a> | singleton                |
| 3246 | <a href="#">DY617358</a> | singleton                |
| 3252 | <a href="#">DY617362</a> | singleton                |
| 3256 | <a href="#">DY617363</a> | <a href="#">TC107419</a> |
| 3265 | <a href="#">DY617367</a> | <a href="#">TC107635</a> |
| 3281 | <a href="#">DY617369</a> | <a href="#">TC95150</a>  |
| 3284 | <a href="#">DY617370</a> | <a href="#">TC107854</a> |
| 3290 | <a href="#">DY617372</a> | <a href="#">TC108280</a> |
| 3291 | <a href="#">DY617373</a> | singleton                |
| 3292 | <a href="#">DY617374</a> | singleton                |
| 3295 | <a href="#">DY617376</a> | <a href="#">TC94712</a>  |
| 3296 | <a href="#">DY617377</a> | <a href="#">TC98077</a>  |
| 3301 | <a href="#">DY617378</a> | <a href="#">TC98445</a>  |
| 3305 | <a href="#">DY617379</a> | singleton                |
| 3308 | <a href="#">DY617381</a> | <a href="#">TC106321</a> |
| 3309 | <a href="#">DY617382</a> | singleton                |
| 3310 | <a href="#">DY617383</a> | <a href="#">TC96456</a>  |
| 3311 | <a href="#">DY617384</a> | <a href="#">TC105106</a> |
| 3313 | <a href="#">DY617386</a> | singleton                |
| 3317 | <a href="#">DY617388</a> | <a href="#">TC109722</a> |
| 3318 | <a href="#">DY617389</a> | <a href="#">TC103116</a> |
| 3325 | <a href="#">DY617391</a> | <a href="#">TC109930</a> |
| 3331 | <a href="#">DY617392</a> | <a href="#">TC103438</a> |
| 3334 | <a href="#">DY617393</a> | <a href="#">TC108214</a> |
| 3335 | <a href="#">DY617394</a> | <a href="#">TC106332</a> |
| 3336 | <a href="#">DY617395</a> | <a href="#">TC99999</a>  |
| 3338 | <a href="#">DY617397</a> | <a href="#">TC101595</a> |
| 3339 | <a href="#">DY617398</a> | <a href="#">TC111557</a> |
| 3340 | <a href="#">DY617399</a> | <a href="#">TC100631</a> |
| 3355 | <a href="#">DY617401</a> | singleton                |
| 3362 | <a href="#">DY617403</a> | <a href="#">TC106463</a> |
| 3367 | <a href="#">DY617406</a> | singleton                |
| 3368 | <a href="#">DY617407</a> | <a href="#">TC101202</a> |
| 3370 | <a href="#">DY617408</a> | <a href="#">TC107352</a> |
| 3381 | <a href="#">DY617412</a> | <a href="#">TC107132</a> |
| 3384 | <a href="#">DY617413</a> | <a href="#">TC94631</a>  |
| 3385 | <a href="#">DY617414</a> | <a href="#">TC100262</a> |
| 3386 | <a href="#">DY617415</a> | <a href="#">TC101238</a> |
| 3387 | <a href="#">DY617416</a> | singleton                |
| 3390 | <a href="#">DY617418</a> | <a href="#">TC100728</a> |
| 3392 | <a href="#">DY617419</a> | singleton                |
| 3393 | <a href="#">DY617420</a> | <a href="#">TC101408</a> |

|      |                          |                          |
|------|--------------------------|--------------------------|
| 3400 | <a href="#">DY617421</a> | <a href="#">TC95075</a>  |
| 3402 | <a href="#">DY617422</a> | <a href="#">TC108139</a> |
| 3405 | <a href="#">DY617423</a> | singleton                |
| 3406 | <a href="#">DY617424</a> | singleton                |
| 3411 | <a href="#">DY617425</a> | <a href="#">TC104645</a> |
| 3413 | <a href="#">DY617426</a> | <a href="#">TC93941</a>  |
| 3417 | <a href="#">DY617429</a> | singleton                |
| 3418 | <a href="#">DY617430</a> | <a href="#">TC110195</a> |
| 3420 | <a href="#">DY617432</a> | <a href="#">TC98519</a>  |
| 3421 | <a href="#">DY617433</a> | <a href="#">TC100601</a> |
| 3422 | <a href="#">DY617434</a> | <a href="#">TC106985</a> |
| 3424 | <a href="#">DY617436</a> | <a href="#">TC95040</a>  |
| 3425 | <a href="#">DY617437</a> | <a href="#">TC107401</a> |
| 3430 | <a href="#">DY617441</a> | <a href="#">TC95340</a>  |
| 3434 | <a href="#">DY617443</a> | <a href="#">TC106865</a> |
| 3436 | <a href="#">DY617445</a> | <a href="#">TC97701</a>  |
| 3438 | <a href="#">DY617447</a> | <a href="#">TC110061</a> |
| 3439 | <a href="#">DY617448</a> | <a href="#">TC95215</a>  |
| 3440 | <a href="#">DY617449</a> | <a href="#">TC106496</a> |
| 3442 | <a href="#">DY617450</a> | singleton                |
| 3445 | <a href="#">DY617452</a> | <a href="#">TC100498</a> |
| 3451 | <a href="#">DY617455</a> | <a href="#">TC101920</a> |
| 3455 | <a href="#">DY617456</a> | <a href="#">TC107024</a> |
| 3457 | <a href="#">DY617458</a> | <a href="#">TC106060</a> |
| 3459 | <a href="#">DY617459</a> | <a href="#">TC109945</a> |
| 3461 | <a href="#">DY617460</a> | <a href="#">TC107017</a> |
| 3462 | <a href="#">DY617461</a> | <a href="#">TC94685</a>  |
| 3463 | <a href="#">DY617462</a> | singleton                |
| 3465 | <a href="#">DY617463</a> | <a href="#">TC99512</a>  |
| 3466 | <a href="#">DY617464</a> | singleton                |
| 3467 | <a href="#">DY617465</a> | <a href="#">TC107275</a> |
| 3468 | <a href="#">DY617466</a> | <a href="#">TC106520</a> |
| 3469 | <a href="#">DY617467</a> | <a href="#">TC94583</a>  |
| 3470 | <a href="#">DY617468</a> | <a href="#">TC94796</a>  |
| 3471 | <a href="#">DY617469</a> | <a href="#">TC109490</a> |
| 3475 | <a href="#">DY617470</a> | singleton                |
| 3478 | <a href="#">DY617472</a> | <a href="#">TC109261</a> |
| 3480 | <a href="#">DY617474</a> | <a href="#">TC96501</a>  |
| 3484 | <a href="#">DY617475</a> | <a href="#">TC94732</a>  |
| 3485 | <a href="#">DY617476</a> | <a href="#">TC106988</a> |
| 3488 | <a href="#">DY617479</a> | <a href="#">TC96334</a>  |
| 3490 | <a href="#">DY617480</a> | <a href="#">TC106719</a> |
| 3495 | <a href="#">DY617483</a> | singleton                |
| 3497 | <a href="#">DY617484</a> | <a href="#">TC96184</a>  |
| 3505 | <a href="#">DY617487</a> | <a href="#">TC95255</a>  |
| 3508 | <a href="#">DY617489</a> | <a href="#">TC99849</a>  |
| 3510 | <a href="#">DY617491</a> | <a href="#">TC100240</a> |
| 3511 | <a href="#">DY617492</a> | <a href="#">TC106685</a> |
| 3515 | <a href="#">DY617493</a> | <a href="#">TC107124</a> |
| 3520 | <a href="#">DY617494</a> | <a href="#">TC102066</a> |
| 3522 | <a href="#">DY617495</a> | <a href="#">TC96003</a>  |
| 3524 | <a href="#">DY617497</a> | <a href="#">TC100144</a> |
| 3533 | <a href="#">DY617501</a> | <a href="#">TC94395</a>  |
| 3534 | <a href="#">DY617502</a> | <a href="#">TC107822</a> |
| 3536 | <a href="#">DY617503</a> | <a href="#">TC95315</a>  |
| 3548 | <a href="#">DY617506</a> | <a href="#">TC95382</a>  |



|      |                          |                          |
|------|--------------------------|--------------------------|
| 3549 | <a href="#">DY617507</a> | singleton                |
| 3550 | <a href="#">DY617508</a> | <a href="#">TC96176</a>  |
| 3552 | <a href="#">DY617509</a> | <a href="#">TC106465</a> |
| 3557 | <a href="#">DY617511</a> | <a href="#">TC94154</a>  |
| 3560 | <a href="#">DY617513</a> | singleton                |
| 3563 | <a href="#">DY617514</a> | <a href="#">TC100931</a> |
| 3564 | <a href="#">DY617515</a> | <a href="#">TC101167</a> |
| 3579 | <a href="#">DY617517</a> | <a href="#">TC106675</a> |
| 3595 | <a href="#">DY617518</a> | <a href="#">TC94673</a>  |
| 3615 | <a href="#">DY617519</a> | singleton                |
| 3617 | <a href="#">DY617520</a> | <a href="#">TC109432</a> |
| 3620 | <a href="#">DY617521</a> | <a href="#">TC97347</a>  |
| 3623 | <a href="#">DY617523</a> | <a href="#">TC108151</a> |
| 3628 | <a href="#">DY617526</a> | <a href="#">TC104335</a> |
| 3629 | <a href="#">DY617527</a> | <a href="#">TC94045</a>  |
| 3635 | <a href="#">DY617530</a> | <a href="#">TC108905</a> |
| 3636 | <a href="#">DY617531</a> | <a href="#">TC94697</a>  |
| 3638 | <a href="#">DY617532</a> | <a href="#">TC111076</a> |
| 3639 | <a href="#">DY617533</a> | <a href="#">TC107876</a> |
| 3640 | <a href="#">DY617534</a> | <a href="#">TC108455</a> |
| 3643 | <a href="#">DY617537</a> | singleton                |
| 3647 | <a href="#">DY617539</a> | <a href="#">TC100883</a> |
| 3651 | <a href="#">DY617542</a> | singleton                |
| 3652 | <a href="#">DY617543</a> | <a href="#">TC110362</a> |
| 3656 | <a href="#">DY617547</a> | <a href="#">TC100257</a> |
| 3658 | <a href="#">DY617548</a> | <a href="#">TC107270</a> |
| 3659 | <a href="#">DY617549</a> | singleton                |
| 3660 | <a href="#">DY617550</a> | <a href="#">TC108218</a> |
| 3663 | <a href="#">DY617551</a> | <a href="#">TC100890</a> |
| 3666 | <a href="#">DY617554</a> | singleton                |
| 3667 | <a href="#">DY617555</a> | <a href="#">TC111030</a> |
| 3671 | <a href="#">DY617558</a> | <a href="#">TC95796</a>  |
| 3674 | <a href="#">DY617560</a> | <a href="#">TC100476</a> |
| 3676 | <a href="#">DY617562</a> | <a href="#">TC95836</a>  |
| 3677 | <a href="#">DY617563</a> | <a href="#">TC94513</a>  |
| 3678 | <a href="#">DY617564</a> | <a href="#">TC97895</a>  |
| 3679 | <a href="#">DY617565</a> | <a href="#">TC96646</a>  |
| 3682 | <a href="#">DY617567</a> | singleton                |
| 3684 | <a href="#">DY617569</a> | <a href="#">TC103517</a> |
| 3685 | <a href="#">DY617570</a> | <a href="#">TC101893</a> |
| 3687 | <a href="#">DY617571</a> | <a href="#">TC96729</a>  |
| 3688 | <a href="#">DY617572</a> | singleton                |
| 3694 | <a href="#">DY617577</a> | <a href="#">TC106841</a> |
| 3695 | <a href="#">DY617578</a> | <a href="#">TC102310</a> |
| 3696 | <a href="#">DY617579</a> | <a href="#">TC106752</a> |
| 3697 | <a href="#">DY617580</a> | singleton                |
| 3699 | <a href="#">DY617582</a> | <a href="#">TC95305</a>  |
| 3700 | <a href="#">DY617583</a> | <a href="#">TC95641</a>  |
| 3703 | <a href="#">DY617584</a> | singleton                |
| 3705 | <a href="#">DY617586</a> | <a href="#">TC97702</a>  |
| 3707 | <a href="#">DY617588</a> | <a href="#">TC106727</a> |
| 3708 | <a href="#">DY617589</a> | singleton                |
| 3710 | <a href="#">DY617591</a> | <a href="#">TC101330</a> |
| 3713 | <a href="#">DY617593</a> | singleton                |
| 3717 | <a href="#">DY617596</a> | <a href="#">TC98728</a>  |
| 3719 | <a href="#">DY617598</a> | <a href="#">TC106161</a> |

|      |                          |                          |
|------|--------------------------|--------------------------|
| 3720 | <a href="#">DY617599</a> | <a href="#">TC108764</a> |
| 3721 | <a href="#">DY617600</a> | <a href="#">TC94965</a>  |
| 3722 | <a href="#">DY617601</a> | <a href="#">TC94447</a>  |
| 3724 | <a href="#">DY617602</a> | singleton                |
| 3725 | <a href="#">DY617603</a> | <a href="#">TC100694</a> |
| 3731 | <a href="#">DY617606</a> | <a href="#">TC101834</a> |
| 3732 | <a href="#">DY617607</a> | singleton                |
| 3735 | <a href="#">DY617609</a> | <a href="#">TC94760</a>  |
| 3744 | <a href="#">DY617614</a> | <a href="#">TC107320</a> |
| 3746 | <a href="#">DY617615</a> | <a href="#">TC95470</a>  |
| 3747 | <a href="#">DY617616</a> | singleton                |
| 3748 | <a href="#">DY617617</a> | <a href="#">TC96633</a>  |
| 3751 | <a href="#">DY617620</a> | singleton                |
| 3755 | <a href="#">DY617624</a> | <a href="#">TC99896</a>  |
| 3756 | <a href="#">DY617625</a> | <a href="#">TC95243</a>  |
| 3757 | <a href="#">DY617626</a> | <a href="#">TC110867</a> |
| 3758 | <a href="#">DY617627</a> | <a href="#">TC106963</a> |
| 3761 | <a href="#">DY617629</a> | <a href="#">TC103087</a> |
| 3764 | <a href="#">DY617631</a> | <a href="#">TC105999</a> |
| 3765 | <a href="#">DY617632</a> | <a href="#">TC107407</a> |
| 3768 | <a href="#">DY617634</a> | <a href="#">TC100822</a> |
| 3771 | <a href="#">DY617636</a> | <a href="#">TC94497</a>  |
| 3772 | <a href="#">DY617637</a> | <a href="#">TC96333</a>  |
| 3774 | <a href="#">DY617638</a> | <a href="#">TC98265</a>  |
| 3775 | <a href="#">DY617639</a> | <a href="#">TC104466</a> |
| 3780 | <a href="#">DY617643</a> | <a href="#">TC101134</a> |
| 3781 | <a href="#">DY617644</a> | <a href="#">TC107038</a> |
| 3782 | <a href="#">DY617645</a> | <a href="#">TC106902</a> |
| 3787 | <a href="#">DY617648</a> | singleton                |
| 3788 | <a href="#">DY617649</a> | singleton                |
| 3790 | <a href="#">DY617651</a> | singleton                |
| 3792 | <a href="#">DY617652</a> | <a href="#">TC106608</a> |
| 3794 | <a href="#">DY617654</a> | <a href="#">TC106600</a> |
| 3795 | <a href="#">DY617655</a> | <a href="#">TC106473</a> |
| 3797 | <a href="#">DY617657</a> | singleton                |
| 3799 | <a href="#">DY617658</a> | singleton                |
| 3800 | <a href="#">DY617659</a> | singleton                |
| 3801 | <a href="#">DY617660</a> | <a href="#">TC110747</a> |
| 3803 | <a href="#">DY617662</a> | <a href="#">TC106122</a> |
| 3804 | <a href="#">DY617663</a> | <a href="#">TC108020</a> |
| 3807 | <a href="#">DY617665</a> | <a href="#">TC108396</a> |
| 3809 | <a href="#">DY617667</a> | <a href="#">TC100589</a> |
| 3811 | <a href="#">DY617669</a> | <a href="#">TC97010</a>  |
| 3812 | <a href="#">DY617670</a> | <a href="#">TC96071</a>  |
| 3816 | <a href="#">DY617672</a> | singleton                |
| 3818 | <a href="#">DY617674</a> | singleton                |
| 3822 | <a href="#">DY617677</a> | <a href="#">TC107034</a> |
| 3823 | <a href="#">DY617678</a> | <a href="#">TC109018</a> |
| 3825 | <a href="#">DY617680</a> | singleton                |
| 3828 | <a href="#">DY617683</a> | <a href="#">TC94611</a>  |
| 3829 | <a href="#">DY617684</a> | <a href="#">TC104893</a> |
| 3834 | <a href="#">DY617689</a> | <a href="#">TC102250</a> |
| 3835 | <a href="#">DY617690</a> | singleton                |
| 3836 | <a href="#">DY617691</a> | <a href="#">TC100994</a> |
| 3837 | <a href="#">DY617692</a> | <a href="#">TC106487</a> |
| 3838 | <a href="#">DY617693</a> | <a href="#">TC101134</a> |

|      |                          |                          |
|------|--------------------------|--------------------------|
| 3840 | <a href="#">DY617694</a> | singleton                |
| 3842 | <a href="#">DY617695</a> | singleton                |
| 3843 | <a href="#">DY617696</a> | <a href="#">TC100623</a> |
| 3854 | <a href="#">DY617701</a> | <a href="#">TC104788</a> |
| 3858 | <a href="#">DY617703</a> | <a href="#">TC101187</a> |
| 3861 | <a href="#">DY617705</a> | singleton                |
| 3863 | <a href="#">DY617707</a> | <a href="#">TC93976</a>  |
| 3865 | <a href="#">DY617709</a> | <a href="#">TC110124</a> |
| 3866 | <a href="#">DY617710</a> | <a href="#">TC107190</a> |
| 3870 | <a href="#">DY617711</a> | <a href="#">TC95398</a>  |
| 3874 | <a href="#">DY617715</a> | <a href="#">TC99725</a>  |
| 3876 | <a href="#">DY617717</a> | singleton                |
| 3881 | <a href="#">DY617720</a> | <a href="#">TC108777</a> |
| 3883 | <a href="#">DY617721</a> | <a href="#">TC106745</a> |
| 3884 | <a href="#">DY617722</a> | <a href="#">TC104024</a> |
| 3887 | <a href="#">DY617723</a> | singleton                |
| 3889 | <a href="#">DY617725</a> | <a href="#">TC108897</a> |
| 3890 | <a href="#">DY617726</a> | <a href="#">TC95696</a>  |
| 3893 | <a href="#">DY617727</a> | <a href="#">TC93936</a>  |
| 3895 | <a href="#">DY617729</a> | <a href="#">TC94812</a>  |
| 3898 | <a href="#">DY617731</a> | <a href="#">TC102622</a> |
| 3901 | <a href="#">DY617732</a> | <a href="#">TC96171</a>  |
| 3902 | <a href="#">DY617733</a> | <a href="#">TC94662</a>  |
| 3904 | <a href="#">DY617735</a> | <a href="#">TC106735</a> |
| 3906 | <a href="#">DY617737</a> | <a href="#">TC101493</a> |
| 3911 | <a href="#">DY617742</a> | <a href="#">TC108667</a> |
| 3916 | <a href="#">DY617747</a> | <a href="#">TC106840</a> |
| 3917 | <a href="#">DY617748</a> | <a href="#">TC107608</a> |
| 3918 | <a href="#">DY617749</a> | singleton                |
| 3919 | <a href="#">DY617750</a> | <a href="#">TC100166</a> |
| 3920 | <a href="#">DY617751</a> | <a href="#">TC109045</a> |
| 3921 | <a href="#">DY617752</a> | <a href="#">TC100432</a> |
| 3923 | <a href="#">DY617754</a> | <a href="#">TC108713</a> |
| 3924 | <a href="#">DY617755</a> | <a href="#">TC102451</a> |
| 3928 | <a href="#">DY617758</a> | singleton                |
| 3929 | <a href="#">DY617759</a> | <a href="#">TC103379</a> |
| 3931 | <a href="#">DY617761</a> | <a href="#">TC106542</a> |
| 3933 | <a href="#">DY617763</a> | singleton                |
| 3936 | <a href="#">DY617765</a> | <a href="#">TC101155</a> |
| 3937 | <a href="#">DY617766</a> | <a href="#">TC95710</a>  |
| 3938 | <a href="#">DY617767</a> | <a href="#">TC102079</a> |
| 3940 | <a href="#">DY617769</a> | <a href="#">TC107046</a> |
| 3948 | <a href="#">DY617772</a> | <a href="#">TC109834</a> |
| 3950 | <a href="#">DY617774</a> | singleton                |
| 3951 | <a href="#">DY617775</a> | <a href="#">TC100745</a> |
| 3953 | <a href="#">DY617777</a> | <a href="#">TC102051</a> |
| 3954 | <a href="#">DY617778</a> | <a href="#">TC109112</a> |
| 3955 | <a href="#">DY617779</a> | <a href="#">TC105121</a> |
| 3957 | <a href="#">DY617781</a> | singleton                |
| 3958 | <a href="#">DY617782</a> | singleton                |
| 3961 | <a href="#">DY617784</a> | <a href="#">TC103707</a> |
| 3962 | <a href="#">DY617785</a> | <a href="#">TC108168</a> |
| 3963 | <a href="#">DY617786</a> | <a href="#">TC95684</a>  |
| 3966 | <a href="#">DY617788</a> | singleton                |
| 3967 | <a href="#">DY617789</a> | <a href="#">TC111967</a> |
| 3969 | <a href="#">DY617791</a> | <a href="#">TC95240</a>  |

|      |                          |                          |
|------|--------------------------|--------------------------|
| 3974 | <a href="#">DY617793</a> | singleton                |
| 3976 | <a href="#">DY617795</a> | singleton                |
| 3979 | <a href="#">DY617797</a> | <a href="#">TC101430</a> |
| 3982 | <a href="#">DY617800</a> | <a href="#">TC106852</a> |
| 3983 | <a href="#">DY617801</a> | <a href="#">TC100687</a> |
| 3985 | <a href="#">DY617802</a> | <a href="#">TC103386</a> |
| 3986 | <a href="#">DY617803</a> | <a href="#">TC110678</a> |
| 3987 | <a href="#">DY617804</a> | <a href="#">TC95672</a>  |
| 3988 | <a href="#">DY617805</a> | <a href="#">TC101092</a> |
| 3990 | <a href="#">DY617807</a> | <a href="#">TC101021</a> |
| 3992 | <a href="#">DY617809</a> | <a href="#">TC107685</a> |
| 3998 | <a href="#">DY617814</a> | <a href="#">TC95177</a>  |
| 4000 | <a href="#">DY617815</a> | <a href="#">TC94805</a>  |
| 4002 | <a href="#">DY617817</a> | singleton                |
| 4004 | <a href="#">DY617819</a> | singleton                |
| 4005 | <a href="#">DY617820</a> | <a href="#">TC107880</a> |
| 4006 | <a href="#">DY617821</a> | singleton                |
| 4007 | <a href="#">DY617822</a> | <a href="#">TC106318</a> |
| 4009 | <a href="#">DY617824</a> | <a href="#">TC95486</a>  |
| 4011 | <a href="#">DY617826</a> | <a href="#">TC94783</a>  |
| 4012 | <a href="#">DY617827</a> | <a href="#">TC94731</a>  |
| 4013 | <a href="#">DY617828</a> | <a href="#">TC107261</a> |
| 4014 | <a href="#">DY617829</a> | <a href="#">TC94827</a>  |
| 4015 | <a href="#">DY617830</a> | <a href="#">TC100933</a> |
| 4016 | <a href="#">DY617831</a> | singleton                |
| 4017 | <a href="#">DY617832</a> | <a href="#">TC94061</a>  |
| 4018 | <a href="#">DY617833</a> | <a href="#">TC98964</a>  |
| 4019 | <a href="#">DY617834</a> | <a href="#">TC94605</a>  |
| 4023 | <a href="#">DY617836</a> | <a href="#">TC108307</a> |
| 4024 | <a href="#">DY617837</a> | singleton                |
| 4026 | <a href="#">DY617839</a> | <a href="#">TC106655</a> |
| 4028 | <a href="#">DY617840</a> | singleton                |
| 4031 | <a href="#">DY617841</a> | <a href="#">TC94961</a>  |
| 4033 | <a href="#">DY617843</a> | <a href="#">TC103381</a> |
| 4034 | <a href="#">DY617844</a> | <a href="#">TC109341</a> |
| 4035 | <a href="#">DY617845</a> | singleton                |
| 4037 | <a href="#">DY617846</a> | singleton                |
| 4038 | <a href="#">DY617847</a> | <a href="#">TC101712</a> |
| 4039 | <a href="#">DY617848</a> | <a href="#">TC97192</a>  |
| 4042 | <a href="#">DY617850</a> | <a href="#">TC94257</a>  |
| 4043 | <a href="#">DY617851</a> | <a href="#">TC95705</a>  |
| 4046 | <a href="#">DY617853</a> | <a href="#">TC106381</a> |
| 4049 | <a href="#">DY617854</a> | <a href="#">TC103935</a> |
| 4051 | <a href="#">DY617856</a> | <a href="#">TC96632</a>  |
| 4052 | <a href="#">DY617857</a> | <a href="#">TC110003</a> |
| 4056 | <a href="#">DY617859</a> | singleton                |
| 4057 | <a href="#">DY617860</a> | <a href="#">TC106676</a> |
| 4060 | <a href="#">DY617863</a> | <a href="#">TC108506</a> |
| 4064 | <a href="#">DY617867</a> | singleton                |
| 4065 | <a href="#">DY617868</a> | <a href="#">TC102358</a> |
| 4068 | <a href="#">DY617870</a> | <a href="#">TC95066</a>  |
| 4071 | <a href="#">DY617871</a> | <a href="#">TC95606</a>  |
| 4074 | <a href="#">DY617874</a> | <a href="#">TC95983</a>  |
| 4075 | <a href="#">DY617875</a> | singleton                |
| 4076 | <a href="#">DY617876</a> | <a href="#">TC96023</a>  |
| 4077 | <a href="#">DY617877</a> | <a href="#">TC95486</a>  |

|      |                          |                          |
|------|--------------------------|--------------------------|
| 4078 | <a href="#">DY617878</a> | singleton                |
| 4081 | <a href="#">DY617881</a> | <a href="#">TC101320</a> |
| 4084 | <a href="#">DY617884</a> | <a href="#">TC95669</a>  |
| 4085 | <a href="#">DY617885</a> | <a href="#">TC100434</a> |
| 4088 | <a href="#">DY617887</a> | <a href="#">TC95699</a>  |
| 4092 | <a href="#">DY617889</a> | <a href="#">TC107200</a> |
| 4095 | <a href="#">DY617891</a> | <a href="#">TC94683</a>  |
| 4096 | <a href="#">DY617892</a> | <a href="#">TC102234</a> |
| 4098 | <a href="#">DY617893</a> | singleton                |
| 4099 | <a href="#">DY617894</a> | <a href="#">TC95402</a>  |
| 4100 | <a href="#">DY617895</a> | singleton                |
| 4103 | <a href="#">DY617898</a> | <a href="#">TC98370</a>  |
| 4104 | <a href="#">DY617899</a> | <a href="#">TC101022</a> |
| 4105 | <a href="#">DY617900</a> | singleton                |
| 4106 | <a href="#">DY617901</a> | <a href="#">TC94526</a>  |
| 4107 | <a href="#">DY617902</a> | <a href="#">TC102728</a> |
| 4108 | <a href="#">DY617903</a> | <a href="#">TC94839</a>  |
| 4109 | <a href="#">DY617904</a> | <a href="#">TC94801</a>  |
| 4111 | <a href="#">DY617906</a> | singleton                |
| 4112 | <a href="#">DY617907</a> | <a href="#">TC107695</a> |
| 4114 | <a href="#">DY617908</a> | <a href="#">TC112456</a> |
| 4115 | <a href="#">DY617909</a> | singleton                |
| 4117 | <a href="#">DY617911</a> | <a href="#">TC111989</a> |
| 4118 | <a href="#">DY617912</a> | <a href="#">TC94683</a>  |
| 4121 | <a href="#">DY617914</a> | <a href="#">TC99937</a>  |
| 4122 | <a href="#">DY617915</a> | <a href="#">TC103781</a> |
| 4124 | <a href="#">DY617917</a> | <a href="#">TC94521</a>  |
| 4126 | <a href="#">DY617919</a> | singleton                |
| 4127 | <a href="#">DY617920</a> | singleton                |
| 4128 | <a href="#">DY617921</a> | <a href="#">TC101234</a> |
| 4130 | <a href="#">DY617922</a> | <a href="#">TC108143</a> |
| 4132 | <a href="#">DY617924</a> | <a href="#">TC94701</a>  |
| 4139 | <a href="#">DY617928</a> | <a href="#">TC101403</a> |
| 4141 | <a href="#">DY617930</a> | singleton                |
| 4142 | <a href="#">DY617931</a> | singleton                |
| 4143 | <a href="#">DY617932</a> | <a href="#">TC108902</a> |
| 4147 | <a href="#">DY617934</a> | <a href="#">TC101273</a> |
| 4150 | <a href="#">DY617936</a> | <a href="#">TC106537</a> |
| 4151 | <a href="#">DY617937</a> | <a href="#">TC96630</a>  |
| 4158 | <a href="#">DY617942</a> | <a href="#">TC112244</a> |
| 4159 | <a href="#">DY617943</a> | singleton                |
| 4161 | <a href="#">DY617944</a> | <a href="#">TC107457</a> |
| 4162 | <a href="#">DY617945</a> | <a href="#">TC99899</a>  |
| 4164 | <a href="#">DY617947</a> | <a href="#">TC100577</a> |
| 4165 | <a href="#">DY617948</a> | <a href="#">TC109389</a> |
| 4169 | <a href="#">DY617952</a> | <a href="#">TC103015</a> |
| 4170 | <a href="#">DY617953</a> | <a href="#">TC93981</a>  |
| 4171 | <a href="#">DY617954</a> | <a href="#">TC100215</a> |
| 4174 | <a href="#">DY617956</a> | <a href="#">TC95080</a>  |
| 4175 | <a href="#">DY617957</a> | singleton                |
| 4187 | <a href="#">DY617963</a> | <a href="#">TC102810</a> |
| 4191 | <a href="#">DY617965</a> | <a href="#">TC106705</a> |
| 4193 | <a href="#">DY617967</a> | <a href="#">TC104412</a> |
| 4197 | <a href="#">DY617971</a> | <a href="#">TC101912</a> |
| 4198 | <a href="#">DY617972</a> | <a href="#">TC111551</a> |
| 4199 | <a href="#">DY617973</a> | singleton                |

|      |                          |                          |
|------|--------------------------|--------------------------|
| 4200 | <a href="#">DY617974</a> | <a href="#">TC107109</a> |
| 4201 | <a href="#">DY617975</a> | singleton                |
| 4202 | <a href="#">DY617976</a> | <a href="#">TC107198</a> |
| 4203 | <a href="#">DY617977</a> | <a href="#">TC100750</a> |
| 4208 | <a href="#">DY617980</a> | <a href="#">TC95778</a>  |
| 4211 | <a href="#">DY617983</a> | <a href="#">TC104256</a> |
| 4212 | <a href="#">DY617984</a> | singleton                |
| 4214 | <a href="#">DY617985</a> | <a href="#">TC110269</a> |
| 4215 | <a href="#">DY617986</a> | <a href="#">TC93930</a>  |
| 4217 | <a href="#">DY617988</a> | <a href="#">TC94136</a>  |
| 4218 | <a href="#">DY617989</a> | <a href="#">TC94474</a>  |
| 4219 | <a href="#">DY617990</a> | singleton                |
| 4222 | <a href="#">DY617993</a> | <a href="#">TC93969</a>  |
| 4223 | <a href="#">DY617994</a> | <a href="#">TC94381</a>  |
| 4224 | <a href="#">DY617995</a> | singleton                |
| 4225 | <a href="#">DY617996</a> | <a href="#">TC94814</a>  |
| 4226 | <a href="#">DY617997</a> | <a href="#">TC106794</a> |
| 4227 | <a href="#">DY617998</a> | <a href="#">TC107104</a> |
| 4228 | <a href="#">DY617999</a> | <a href="#">TC109818</a> |
| 4231 | <a href="#">DY618002</a> | <a href="#">TC106673</a> |
| 4232 | <a href="#">DY618003</a> | <a href="#">TC106399</a> |
| 4234 | <a href="#">DY618005</a> | <a href="#">TC107511</a> |
| 4237 | <a href="#">DY618008</a> | singleton                |
| 4238 | <a href="#">DY618009</a> | <a href="#">TC94967</a>  |
| 4239 | <a href="#">DY618010</a> | <a href="#">TC101490</a> |
| 4240 | <a href="#">DY618011</a> | <a href="#">TC100802</a> |
| 4243 | <a href="#">DY618013</a> | <a href="#">TC105358</a> |
| 4244 | <a href="#">DY618014</a> | <a href="#">TC94614</a>  |
| 4245 | <a href="#">DY618015</a> | <a href="#">TC94676</a>  |
| 4249 | <a href="#">DY618018</a> | <a href="#">TC102273</a> |
| 4251 | <a href="#">DY618020</a> | <a href="#">TC101091</a> |
| 4256 | <a href="#">DY618022</a> | <a href="#">TC107199</a> |
| 4262 | <a href="#">DY618025</a> | <a href="#">TC97063</a>  |
| 4263 | <a href="#">DY618026</a> | <a href="#">TC99622</a>  |
| 4264 | <a href="#">DY618027</a> | <a href="#">TC100666</a> |
| 4265 | <a href="#">DY618028</a> | <a href="#">TC109087</a> |
| 4267 | <a href="#">DY618029</a> | singleton                |
| 4268 | <a href="#">DY618030</a> | <a href="#">TC100638</a> |
| 4272 | <a href="#">DY618034</a> | <a href="#">TC95272</a>  |
| 4276 | <a href="#">DY618038</a> | <a href="#">TC94844</a>  |
| 4277 | <a href="#">DY618039</a> | singleton                |
| 4282 | <a href="#">DY618043</a> | singleton                |
| 4283 | <a href="#">DY618044</a> | <a href="#">TC107556</a> |
| 4284 | <a href="#">DY618045</a> | <a href="#">TC106484</a> |
| 4286 | <a href="#">DY618046</a> | singleton                |
| 4287 | <a href="#">DY618047</a> | <a href="#">TC101498</a> |
| 4289 | <a href="#">DY618048</a> | <a href="#">TC108042</a> |
| 4291 | <a href="#">DY618050</a> | <a href="#">TC95311</a>  |
| 4292 | <a href="#">DY618051</a> | <a href="#">TC94347</a>  |
| 4293 | <a href="#">DY618052</a> | <a href="#">TC107166</a> |
| 4294 | <a href="#">DY618053</a> | singleton                |
| 4296 | <a href="#">DY618055</a> | singleton                |
| 4297 | <a href="#">DY618056</a> | <a href="#">TC94483</a>  |
| 4299 | <a href="#">DY618058</a> | <a href="#">TC109990</a> |
| 4300 | <a href="#">DY618059</a> | <a href="#">TC95049</a>  |
| 4301 | <a href="#">DY618060</a> | <a href="#">TC100231</a> |

|      |                          |                          |
|------|--------------------------|--------------------------|
| 4302 | <a href="#">DY618061</a> | <a href="#">TC94064</a>  |
| 4307 | <a href="#">DY618064</a> | <a href="#">TC93942</a>  |
| 4312 | <a href="#">DY618068</a> | <a href="#">TC107503</a> |
| 4313 | <a href="#">DY618069</a> | <a href="#">TC101632</a> |
| 4316 | <a href="#">DY618070</a> | <a href="#">TC108785</a> |
| 4317 | <a href="#">DY618071</a> | <a href="#">TC100441</a> |
| 4319 | <a href="#">DY618073</a> | <a href="#">TC109480</a> |
| 4321 | <a href="#">DY618075</a> | <a href="#">TC109273</a> |
| 4322 | <a href="#">DY618076</a> | <a href="#">TC97668</a>  |
| 4323 | <a href="#">DY618077</a> | <a href="#">TC107078</a> |
| 4324 | <a href="#">DY618078</a> | <a href="#">TC102375</a> |
| 4325 | <a href="#">DY618079</a> | <a href="#">TC107377</a> |
| 4328 | <a href="#">DY618081</a> | <a href="#">TC108419</a> |
| 4329 | <a href="#">DY618082</a> | <a href="#">TC109784</a> |
| 4331 | <a href="#">DY618084</a> | <a href="#">TC95737</a>  |
| 4333 | <a href="#">DY618086</a> | <a href="#">TC100436</a> |
| 4337 | <a href="#">DY618090</a> | <a href="#">TC101843</a> |
| 4338 | <a href="#">DY618091</a> | <a href="#">TC101140</a> |
| 4339 | <a href="#">DY618092</a> | <a href="#">TC96162</a>  |
| 4342 | <a href="#">DY618094</a> | <a href="#">TC94421</a>  |
| 4345 | <a href="#">DY618097</a> | <a href="#">TC106888</a> |
| 4348 | <a href="#">DY618099</a> | singleton                |
| 4352 | <a href="#">DY618102</a> | <a href="#">TC94869</a>  |
| 4353 | <a href="#">DY618103</a> | <a href="#">TC96056</a>  |
| 4360 | <a href="#">DY618106</a> | <a href="#">TC103203</a> |
| 4363 | <a href="#">DY618108</a> | <a href="#">TC111177</a> |
| 4364 | <a href="#">DY618109</a> | <a href="#">TC101758</a> |
| 4365 | <a href="#">DY618110</a> | <a href="#">TC101215</a> |
| 4366 | <a href="#">DY618111</a> | singleton                |
| 4367 | <a href="#">DY618112</a> | <a href="#">TC101659</a> |
| 4372 | <a href="#">DY618116</a> | singleton                |
| 4374 | <a href="#">DY618118</a> | <a href="#">TC100680</a> |
| 4377 | <a href="#">DY618121</a> | <a href="#">TC102842</a> |
| 4378 | <a href="#">DY618122</a> | <a href="#">TC96493</a>  |
| 4379 | <a href="#">DY618123</a> | <a href="#">TC97287</a>  |
| 4381 | <a href="#">DY618125</a> | <a href="#">TC112058</a> |
| 4382 | <a href="#">DY618126</a> | <a href="#">TC94744</a>  |
| 4384 | <a href="#">DY618128</a> | <a href="#">TC103385</a> |
| 4386 | <a href="#">DY618129</a> | <a href="#">TC102911</a> |
| 4387 | <a href="#">DY618130</a> | singleton                |
| 4388 | <a href="#">DY618131</a> | <a href="#">TC109549</a> |
| 4391 | <a href="#">DY618132</a> | singleton                |
| 4398 | <a href="#">DY618136</a> | <a href="#">TC110990</a> |
| 4399 | <a href="#">DY618137</a> | <a href="#">TC100798</a> |
| 4401 | <a href="#">DY618138</a> | <a href="#">TC100941</a> |
| 4403 | <a href="#">DY618139</a> | singleton                |
| 4406 | <a href="#">DY618141</a> | <a href="#">TC108014</a> |
| 4409 | <a href="#">DY618143</a> | <a href="#">TC101285</a> |
| 4414 | <a href="#">DY618147</a> | <a href="#">TC94641</a>  |
| 4415 | <a href="#">DY618148</a> | singleton                |
| 4416 | <a href="#">DY618149</a> | <a href="#">TC105901</a> |
| 4417 | <a href="#">DY618150</a> | singleton                |
| 4419 | <a href="#">DY618152</a> | <a href="#">TC98260</a>  |
| 4421 | <a href="#">DY618153</a> | singleton                |
| 4425 | <a href="#">DY618154</a> | <a href="#">TC96611</a>  |
| 4428 | <a href="#">DY618155</a> | singleton                |

|      |                          |                          |
|------|--------------------------|--------------------------|
| 4431 | <a href="#">DY618157</a> | <a href="#">TC101620</a> |
| 4432 | <a href="#">DY618158</a> | <a href="#">TC110374</a> |
| 4433 | <a href="#">DY618159</a> | <a href="#">TC94878</a>  |
| 4434 | <a href="#">DY618160</a> | <a href="#">TC107331</a> |
| 4435 | <a href="#">DY618161</a> | <a href="#">TC94228</a>  |
| 4438 | <a href="#">DY618163</a> | singleton                |
| 4439 | <a href="#">DY618164</a> | <a href="#">TC103017</a> |
| 4440 | <a href="#">DY618165</a> | <a href="#">TC104302</a> |
| 4441 | <a href="#">DY618166</a> | <a href="#">TC108654</a> |
| 4444 | <a href="#">DY618168</a> | <a href="#">TC95889</a>  |
| 4448 | <a href="#">DY618172</a> | <a href="#">TC100539</a> |
| 4450 | <a href="#">DY618173</a> | <a href="#">TC109802</a> |
| 4451 | <a href="#">DY618174</a> | <a href="#">TC102366</a> |
| 4452 | <a href="#">DY618175</a> | <a href="#">TC100552</a> |
| 4457 | <a href="#">DY618177</a> | <a href="#">TC101622</a> |
| 4461 | <a href="#">DY618180</a> | <a href="#">TC95840</a>  |
| 4465 | <a href="#">DY618183</a> | <a href="#">TC106476</a> |
| 4467 | <a href="#">DY618184</a> | <a href="#">TC108432</a> |
| 4468 | <a href="#">DY618185</a> | <a href="#">TC100760</a> |
| 4469 | <a href="#">DY618186</a> | <a href="#">TC102413</a> |
| 4472 | <a href="#">DY618189</a> | singleton                |
| 4473 | <a href="#">DY618190</a> | <a href="#">TC110997</a> |
| 4474 | <a href="#">DY618191</a> | singleton                |
| 4475 | <a href="#">DY618192</a> | singleton                |
| 4476 | <a href="#">DY618193</a> | <a href="#">TC100987</a> |
| 4480 | <a href="#">DY618194</a> | <a href="#">TC95480</a>  |
| 4481 | <a href="#">DY618195</a> | singleton                |
| 4482 | <a href="#">DY618196</a> | <a href="#">TC100662</a> |
| 4485 | <a href="#">DY618198</a> | singleton                |
| 4486 | <a href="#">DY618199</a> | <a href="#">TC98330</a>  |
| 4488 | <a href="#">DY618201</a> | singleton                |
| 4491 | <a href="#">DY618202</a> | <a href="#">TC106379</a> |
| 4493 | <a href="#">DY618203</a> | singleton                |
| 4494 | <a href="#">DY618204</a> | <a href="#">TC100885</a> |
| 4496 | <a href="#">DY618205</a> | singleton                |
| 4497 | <a href="#">DY618206</a> | <a href="#">TC108560</a> |
| 4498 | <a href="#">DY618207</a> | singleton                |
| 4501 | <a href="#">DY618210</a> | <a href="#">TC102950</a> |
| 4505 | <a href="#">DY618213</a> | <a href="#">TC97526</a>  |
| 4506 | <a href="#">DY618214</a> | singleton                |
| 4515 | <a href="#">DY618219</a> | singleton                |
| 4516 | <a href="#">DY618220</a> | <a href="#">TC98406</a>  |
| 4517 | <a href="#">DY618221</a> | singleton                |
| 4519 | <a href="#">DY618223</a> | <a href="#">TC95996</a>  |
| 4520 | <a href="#">DY618224</a> | singleton                |
| 4521 | <a href="#">DY618225</a> | <a href="#">TC100399</a> |
| 4523 | <a href="#">DY618227</a> | <a href="#">TC100485</a> |
| 4525 | <a href="#">DY618229</a> | <a href="#">TC96059</a>  |
| 4529 | <a href="#">DY618232</a> | <a href="#">TC101652</a> |
| 4532 | <a href="#">DY618233</a> | <a href="#">TC106619</a> |
| 4536 | <a href="#">DY618236</a> | singleton                |
| 4537 | <a href="#">DY618237</a> | <a href="#">TC100752</a> |
| 4540 | <a href="#">DY618240</a> | singleton                |
| 4542 | <a href="#">DY618242</a> | <a href="#">TC94650</a>  |
| 4545 | <a href="#">DY618245</a> | <a href="#">TC96994</a>  |
| 4546 | <a href="#">DY618246</a> | <a href="#">TC94857</a>  |



|      |                          |                          |
|------|--------------------------|--------------------------|
| 4547 | <a href="#">DY618247</a> | <a href="#">TC103660</a> |
| 4549 | <a href="#">DY618248</a> | singleton                |
| 4552 | <a href="#">DY618249</a> | singleton                |
| 4554 | <a href="#">DY618250</a> | singleton                |
| 4555 | <a href="#">DY618251</a> | <a href="#">TC93960</a>  |
| 4556 | <a href="#">DY618252</a> | singleton                |
| 4557 | <a href="#">DY618253</a> | <a href="#">TC94479</a>  |
| 4558 | <a href="#">DY618254</a> | <a href="#">TC95470</a>  |
| 4559 | <a href="#">DY618255</a> | <a href="#">TC100232</a> |
| 4562 | <a href="#">DY618257</a> | <a href="#">TC110202</a> |
| 4563 | <a href="#">DY618258</a> | singleton                |
| 4565 | <a href="#">DY618259</a> | <a href="#">TC94606</a>  |
| 4568 | <a href="#">DY618261</a> | <a href="#">TC100918</a> |
| 4573 | <a href="#">DY618263</a> | <a href="#">TC94357</a>  |
| 4577 | <a href="#">DY618266</a> | <a href="#">TC103210</a> |
| 4582 | <a href="#">DY618269</a> | <a href="#">TC94758</a>  |
| 4584 | <a href="#">DY618271</a> | singleton                |
| 4591 | <a href="#">DY618275</a> | <a href="#">TC97441</a>  |
| 4594 | <a href="#">DY618277</a> | <a href="#">TC102045</a> |
| 4595 | <a href="#">DY618278</a> | <a href="#">TC108633</a> |
| 4596 | <a href="#">DY618279</a> | singleton                |
| 4600 | <a href="#">DY618282</a> | <a href="#">TC102084</a> |
| 4605 | <a href="#">DY618287</a> | <a href="#">TC111017</a> |
| 4609 | <a href="#">DY618289</a> | <a href="#">TC94062</a>  |
| 4611 | <a href="#">DY618290</a> | <a href="#">TC102650</a> |
| 4613 | <a href="#">DY618291</a> | <a href="#">TC101525</a> |
| 4621 | <a href="#">DY618296</a> | <a href="#">TC97271</a>  |
| 4622 | <a href="#">DY618297</a> | <a href="#">TC107222</a> |
| 4623 | <a href="#">DY618298</a> | singleton                |
| 4624 | <a href="#">DY618299</a> | singleton                |
| 4626 | <a href="#">DY618300</a> | <a href="#">TC108069</a> |
| 4628 | <a href="#">DY618301</a> | <a href="#">TC101773</a> |
| 4630 | <a href="#">DY618303</a> | <a href="#">TC109748</a> |
| 4635 | <a href="#">DY618306</a> | <a href="#">TC101097</a> |
| 4636 | <a href="#">DY618307</a> | <a href="#">TC95787</a>  |
| 4638 | <a href="#">DY618309</a> | <a href="#">TC100216</a> |
| 4639 | <a href="#">DY618310</a> | <a href="#">TC100626</a> |
| 4641 | <a href="#">DY618311</a> | <a href="#">TC107139</a> |
| 4643 | <a href="#">DY618313</a> | <a href="#">TC97017</a>  |
| 4646 | <a href="#">DY618315</a> | <a href="#">TC110328</a> |
| 4650 | <a href="#">DY618318</a> | <a href="#">TC101205</a> |
| 4651 | <a href="#">DY618319</a> | <a href="#">TC107043</a> |
| 4652 | <a href="#">DY618320</a> | <a href="#">TC105164</a> |
| 4653 | <a href="#">DY618321</a> | singleton                |
| 4656 | <a href="#">DY618324</a> | singleton                |
| 4661 | <a href="#">DY618326</a> | <a href="#">TC107582</a> |
| 4662 | <a href="#">DY618327</a> | singleton                |
| 4675 | <a href="#">DY618337</a> | singleton                |
| 4683 | <a href="#">DY618343</a> | <a href="#">TC94014</a>  |
| 4685 | <a href="#">DY618344</a> | <a href="#">TC95489</a>  |
| 4686 | <a href="#">DY618345</a> | <a href="#">TC107333</a> |
| 4688 | <a href="#">DY618347</a> | <a href="#">TC102859</a> |
| 4691 | <a href="#">DY618350</a> | <a href="#">TC96290</a>  |
| 4692 | <a href="#">DY618351</a> | <a href="#">TC95234</a>  |
| 4693 | <a href="#">DY618352</a> | <a href="#">TC107519</a> |
| 4695 | <a href="#">DY618354</a> | <a href="#">TC111361</a> |

|      |                          |                          |
|------|--------------------------|--------------------------|
| 4701 | <a href="#">DY618359</a> | singleton                |
| 4702 | <a href="#">DY618360</a> | <a href="#">TC106348</a> |
| 4703 | <a href="#">DY618361</a> | singleton                |
| 4704 | <a href="#">DY618362</a> | <a href="#">TC95529</a>  |
| 4706 | <a href="#">DY618364</a> | <a href="#">TC95558</a>  |
| 4709 | <a href="#">DY618366</a> | singleton                |
| 4713 | <a href="#">DY618369</a> | <a href="#">TC94575</a>  |
| 4715 | <a href="#">DY618371</a> | <a href="#">TC94651</a>  |
| 4716 | <a href="#">DY618372</a> | <a href="#">TC106540</a> |
| 4718 | <a href="#">DY618374</a> | <a href="#">TC95016</a>  |
| 4722 | <a href="#">DY618377</a> | <a href="#">TC94757</a>  |
| 4723 | <a href="#">DY618378</a> | <a href="#">TC102449</a> |
| 4724 | <a href="#">DY618379</a> | <a href="#">TC96444</a>  |
| 4740 | <a href="#">DY618389</a> | <a href="#">TC100148</a> |
| 4742 | <a href="#">DY618391</a> | <a href="#">TC100673</a> |
| 4744 | <a href="#">DY618393</a> | <a href="#">TC95966</a>  |
| 4753 | <a href="#">DY618398</a> | <a href="#">TC109404</a> |
| 4756 | <a href="#">DY618401</a> | <a href="#">TC106930</a> |
| 4758 | <a href="#">DY618402</a> | singleton                |
| 4763 | <a href="#">DY618404</a> | <a href="#">TC107264</a> |
| 4764 | <a href="#">DY618405</a> | <a href="#">TC109813</a> |
| 4766 | <a href="#">DY618407</a> | <a href="#">TC104473</a> |
| 4767 | <a href="#">DY618408</a> | <a href="#">TC102099</a> |
| 4771 | <a href="#">DY618410</a> | singleton                |
| 4774 | <a href="#">DY618412</a> | <a href="#">TC109854</a> |
| 4777 | <a href="#">DY618413</a> | singleton                |
| 4779 | <a href="#">DY618414</a> | <a href="#">TC102399</a> |
| 4780 | <a href="#">DY618415</a> | <a href="#">TC102163</a> |
| 4781 | <a href="#">DY618416</a> | <a href="#">TC101356</a> |
| 4782 | <a href="#">DY618417</a> | <a href="#">TC100846</a> |
| 4783 | <a href="#">DY618418</a> | <a href="#">TC106621</a> |
| 4787 | <a href="#">DY618420</a> | <a href="#">TC108454</a> |
| 4788 | <a href="#">DY618421</a> | <a href="#">TC99597</a>  |
| 4791 | <a href="#">DY618424</a> | singleton                |
| 4794 | <a href="#">DY618427</a> | <a href="#">TC95125</a>  |
| 4796 | <a href="#">DY618428</a> | <a href="#">TC107164</a> |
| 4798 | <a href="#">DY618429</a> | <a href="#">TC100648</a> |
| 4802 | <a href="#">DY618433</a> | <a href="#">TC94066</a>  |
| 4806 | <a href="#">DY618436</a> | singleton                |
| 4807 | <a href="#">DY618437</a> | <a href="#">TC107956</a> |
| 4809 | <a href="#">DY618439</a> | <a href="#">TC112017</a> |
| 4811 | <a href="#">DY618441</a> | <a href="#">TC106798</a> |
| 4814 | <a href="#">DY618444</a> | <a href="#">TC109229</a> |
| 4817 | <a href="#">DY618447</a> | <a href="#">TC112175</a> |
| 4821 | <a href="#">DY618450</a> | <a href="#">TC97162</a>  |
| 4823 | <a href="#">DY618451</a> | <a href="#">TC105029</a> |
| 4824 | <a href="#">DY618452</a> | <a href="#">TC106356</a> |
| 4825 | <a href="#">DY618453</a> | <a href="#">TC98461</a>  |
| 4827 | <a href="#">DY618455</a> | <a href="#">TC94328</a>  |
| 4830 | <a href="#">DY618457</a> | singleton                |
| 4832 | <a href="#">DY618459</a> | <a href="#">TC93978</a>  |
| 4833 | <a href="#">DY618460</a> | <a href="#">TC93939</a>  |
| 4834 | <a href="#">DY618461</a> | <a href="#">TC95376</a>  |
| 4836 | <a href="#">DY618462</a> | <a href="#">TC100645</a> |
| 4837 | <a href="#">DY618463</a> | singleton                |
| 4839 | <a href="#">DY618464</a> | <a href="#">TC108117</a> |

|      |                          |                          |
|------|--------------------------|--------------------------|
| 4841 | <a href="#">DY618465</a> | <a href="#">TC94571</a>  |
| 4842 | <a href="#">DY618466</a> | <a href="#">TC106858</a> |
| 4843 | <a href="#">DY618467</a> | <a href="#">TC96873</a>  |
| 4844 | <a href="#">DY618468</a> | singleton                |
| 4847 | <a href="#">DY618470</a> | <a href="#">TC94664</a>  |
| 4848 | <a href="#">DY618471</a> | singleton                |
| 4852 | <a href="#">DY618472</a> | singleton                |
| 4853 | <a href="#">DY618473</a> | <a href="#">TC94958</a>  |
| 4854 | <a href="#">DY618474</a> | <a href="#">TC94259</a>  |
| 4855 | <a href="#">DY618475</a> | <a href="#">TC100637</a> |
| 4857 | <a href="#">DY618476</a> | <a href="#">TC103302</a> |
| 4859 | <a href="#">DY618477</a> | <a href="#">TC106368</a> |
| 4862 | <a href="#">DY618479</a> | <a href="#">TC94788</a>  |
| 4864 | <a href="#">DY618481</a> | <a href="#">TC94944</a>  |
| 4868 | <a href="#">DY618484</a> | <a href="#">TC102531</a> |
| 4872 | <a href="#">DY618488</a> | <a href="#">TC93958</a>  |
| 4879 | <a href="#">DY618494</a> | <a href="#">TC104549</a> |
| 4885 | <a href="#">DY618499</a> | <a href="#">TC93963</a>  |
