# Supplementary material for: Differentiation of Symbiotic Cells and Endosymbionts in Medicago truncatula Nodulation Are Coupled to Two Transcriptome-Switches
Source: PubMed Central journal article supplement (PMC2832008; doi:10.1371/journal.pone.0009519), 2010-03-04
Supplement: pone.0009519.s009.pdf [file pone.0009519.s009.pdf]

| cluster                  | sequence                                         | name                     | accession n° |
|--------------------------|--------------------------------------------------|--------------------------|--------------|
| <b>constitutive gene</b> |                                                  |                          |              |
|                          | CTTTGCTTGGTGCTGTTTAGATGG<br>ATTCCAAAGGCGGCTGCATA | H3-like_5<br>H3-like_3   | TC106487     |
| <b>cluster 1 genes</b>   |                                                  |                          |              |
|                          | GGACCAGCCGTTATCTTCAA<br>TTGCTCCTGAAGGATCCAAG     | AC4532_for<br>AC4532_rev | TC106619     |
|                          | GCTGAAGGAGATTGCAGAGG<br>TCAGTCAATGCCAGTCAAA      | AC0589_for<br>AC0589_rev | TC100398     |
|                          | CATCAACATGGACCCAACAA<br>CCGTTAGTCGCGAAAGAGTT     | AC1560_for<br>AC1560_rev | TC100746     |
| <b>cluster 2 genes</b>   |                                                  |                          |              |
|                          | TGGTTCGGTTCAGATTGTCA<br>ACGAACGCCTACACACATGA     | AC2044_for<br>AC2044_rev | TC106656     |
|                          | TGATTCTGCCTTGTTGACAAAT<br>TCACACCTTGTGACCCTGTC   | AC4494_for<br>AC4494_rev | TC100885     |
|                          | CTCCAAATGGTTGGATGGAC<br>CCATAAAAGCCAACCCATTG     | AC3440_for<br>AC3440_rev | TC106496     |
| <b>cluster 3 genes</b>   |                                                  |                          |              |
|                          | GACAAACCACTCCCCAACAC<br>ATACAGACACGTGGCAGACG     | AC3794_for<br>AC3794_rev | TC106600     |
|                          | AGCTCCAGCAGCAGAAGAAG<br>TTTTCAACCTCGACATGCAA     | AC3792_for<br>AC3792_rev | TC106608     |
|                          | AAAAACGCATTCCCAATGTC<br>GTCCTTCAAGGTTCCCATCA     | AC2351_for<br>AC2351_rev | TC107254     |
| <b>cluster 4 genes</b>   |                                                  |                          |              |
|                          | TGTCAGATTCAGCCCTAGCA<br>CCCACAGCAAAATAACACCA     | WD40_for<br>WD40_rev     | TC100539     |
|                          | CAAAGAGGTGTCCTTCATTCTG<br>GAGTCGAATCTCGCCTTGTC   | rip1_for<br>rip1_rev     | TC107261     |
|                          | TCCAATGATATGTTGGCCTTT<br>CAGCATTGTGTGCCAATTTT    | UDPGT_for<br>UDPGT_rev   | TC104645     |
|                          | TTGTTCACTCCATGCTTTG<br>CAAAGGACCCACATTCATT       | MtN3_for<br>MtN3_rev     | TC109032     |
| <b>cluster 5 genes</b>   |                                                  |                          |              |

|                                                     |                                |          |
|-----------------------------------------------------|--------------------------------|----------|
| TGCTAACTGCGTTGTGCTTC<br>TGCACTCCTGATTTTTGCAG        | MtN1-like_for<br>MtN1-like_rev | TC102163 |
| TTCAAAGGTCTGGGACTTGG<br>GCCAAGTTGATCACGGTCTT        | MtN9_for<br>MtN9_rev           | TC95584  |
| TCGATGATGGGATACATTTGGAC<br>GCAAGAAGATGTAGTCAACCAGAT | MtN6_5<br>MtN6_3               | TC96169  |
| AAAGGGCAGCACTGTGAAAT<br>AACAGCACATGGCTTAACGA        | AC2126_5<br>AC2126_3           | TC111120 |
| TGTTGGAGTGCCAAACAAAG<br>TCCAGCTCCCCTTTCTTGTA        | AC4482_5<br>AC4482_3           | TC100662 |
| GCTTCCAATGGAGTGGCTTA<br>ATTCATTTGCCAGCTCAACC        | AC1810_5<br>AC1810_3           | TC102486 |

**cluster 6 genes**

|                                                  |                          |          |
|--------------------------------------------------|--------------------------|----------|
| CCCTACACACTCTCCCTCCA<br>AGGAATCCATTGCCTTTTTGTG   | enod40_5<br>enod40_3     | TC94515  |
| AACTCGACATGCACTCACCCG<br>GGAAGAAAGTACGGGAGCTACC  | enod20_5<br>enod20_3     | TC100731 |
| GAAGACGATTGGTTTGAGCAG<br>CCGACTTGTTGGAGAAGGAG    | NAP1_5<br>NAP1_3         | TC102128 |
| CTTCACACATGCAACACCAA<br>AGCCATCAGCATCTCCAAAT     | lipase_for<br>lipase_rev | TC101756 |
| CACGGGTATGCCATGTAAGA<br>CACAGTAGATGAATGGAAACCGTA | Mt0102_5<br>Mt0102_3     | TC94567  |
| GCGGATGGTATGCTTTAAAG<br>CTTAAATATTGGGGTTGCT      | SPP5<br>SPP6             | TC95076  |

**cluster 7 genes**

|                                               |                                  |          |
|-----------------------------------------------|----------------------------------|----------|
| TGGTGGGCACATATTTCTTG<br>TGGAACCCTCCTTGTTGGTAG | nodulin26_for<br>nodulin26_rev   | TC100851 |
| CAGCTCTTGGGAGCAACACT<br>ATTGCAATTCCAGCCAACCTC | nodulin26a_for<br>nodulin26a_rev | TC100851 |
| TTTTGGCCATTATCCACCAT<br>ATTTGCAGAAAGGGCACATC  | enod2_for<br>enod2_rev           | TC94518  |
| GGCTGTGCAAAGCAATACAA<br>ATAGCCACAACATGCCACAA  | enod8_for<br>enod8_rev           | TC100432 |
| ATGCGTGCTGATCCCTCTAT<br>CGGGATGAGTATGAGGTCCA  | nodulin25_for<br>nodulin25_rev   | TC106696 |

|                      |       |          |
|----------------------|-------|----------|
| TCTCAACTTCGAGCAACAGG | Lb1_5 | TC106592 |
| TTCAGTTGCCAGTGCATCAT | Lb1_3 |          |

**cluster 8 genes**

|                      |        |          |
|----------------------|--------|----------|
| GGAAGGCATGATGTGTTTGA | NAP2_5 | TC108316 |
| GCCACGTTCACTTGTAAGCA | NAP2_3 |          |

|                      |               |         |
|----------------------|---------------|---------|
| TTGCTGGTGATGTGCTTGAT | basicblue_for | TC93931 |
| CTTCATCCCAGATTGGCAGT | basicblue_rev |         |

|                       |          |          |
|-----------------------|----------|----------|
| AACTGATTTCCGGCTTGATGG | Mt0344_5 | TC101807 |
| TCATAGGCAGGAGCAAACCT  | Mt0344_3 |          |

|                         |          |          |
|-------------------------|----------|----------|
| TGGCTCAGTTTCTTCTCTTTGTT | NCR001_5 | TC106577 |
| ATGTGATGTCCCCTGGTTTC    | Mt0068_3 |          |
